# Supplementary material
Source: PubMed Central journal article supplement (PMC5051943)
Supplement: supp_djw200_supplementary_figure_and_Tables.pdf [file supp_djw200_supplementary_figure_and_Tables.pdf]

# Suppl Fig 1

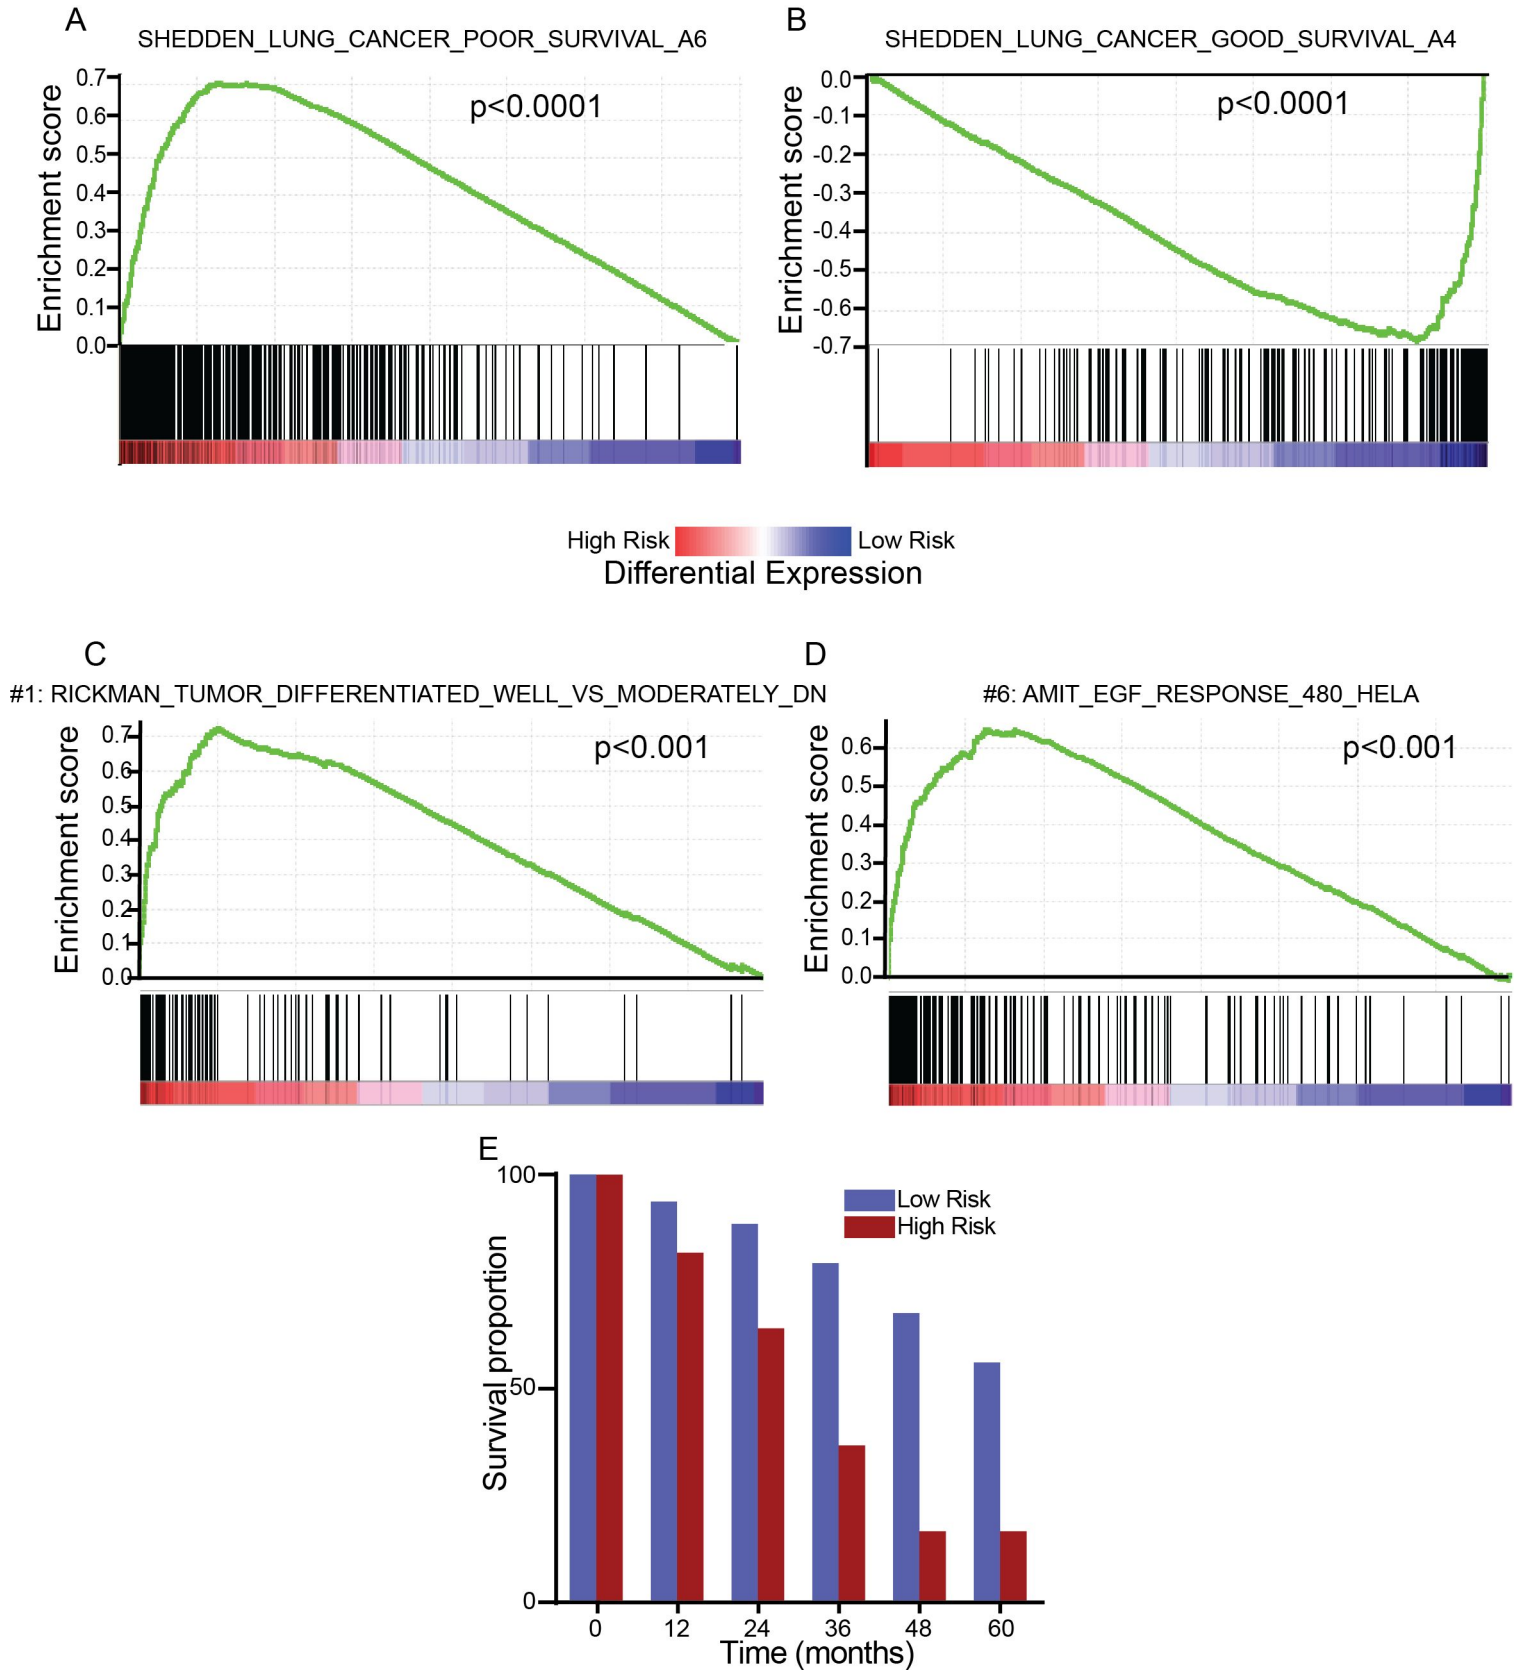

Supplemental Figure 1: GSEA results for High versus Low Risk differentially-expressed genes in TCGA Cohort I for lung cancer survival-related signatures SHEDDEN\_LUNG\_CANCER\_POOR\_SURVIVAL\_A6 (A) and SHEDDEN\_LUNG\_CANCER\_GOOD\_SURVIVAL\_A4 (B), as well as the top overall signature (RICKMAN\_TUMOR\_DIFFERENTIATED\_WELL\_VS\_MODERATELY\_DN) (C) and the top biological pathway signature (AMIT\_EGF\_RESPONSE\_480\_HELA) (D). Full results for all significant signatures can be found in supplemental table 8. Overall survival proportion time-course by 4-gene signature High and Low Risk in TCGA Cohort I (E).

## Suppl Fig 2

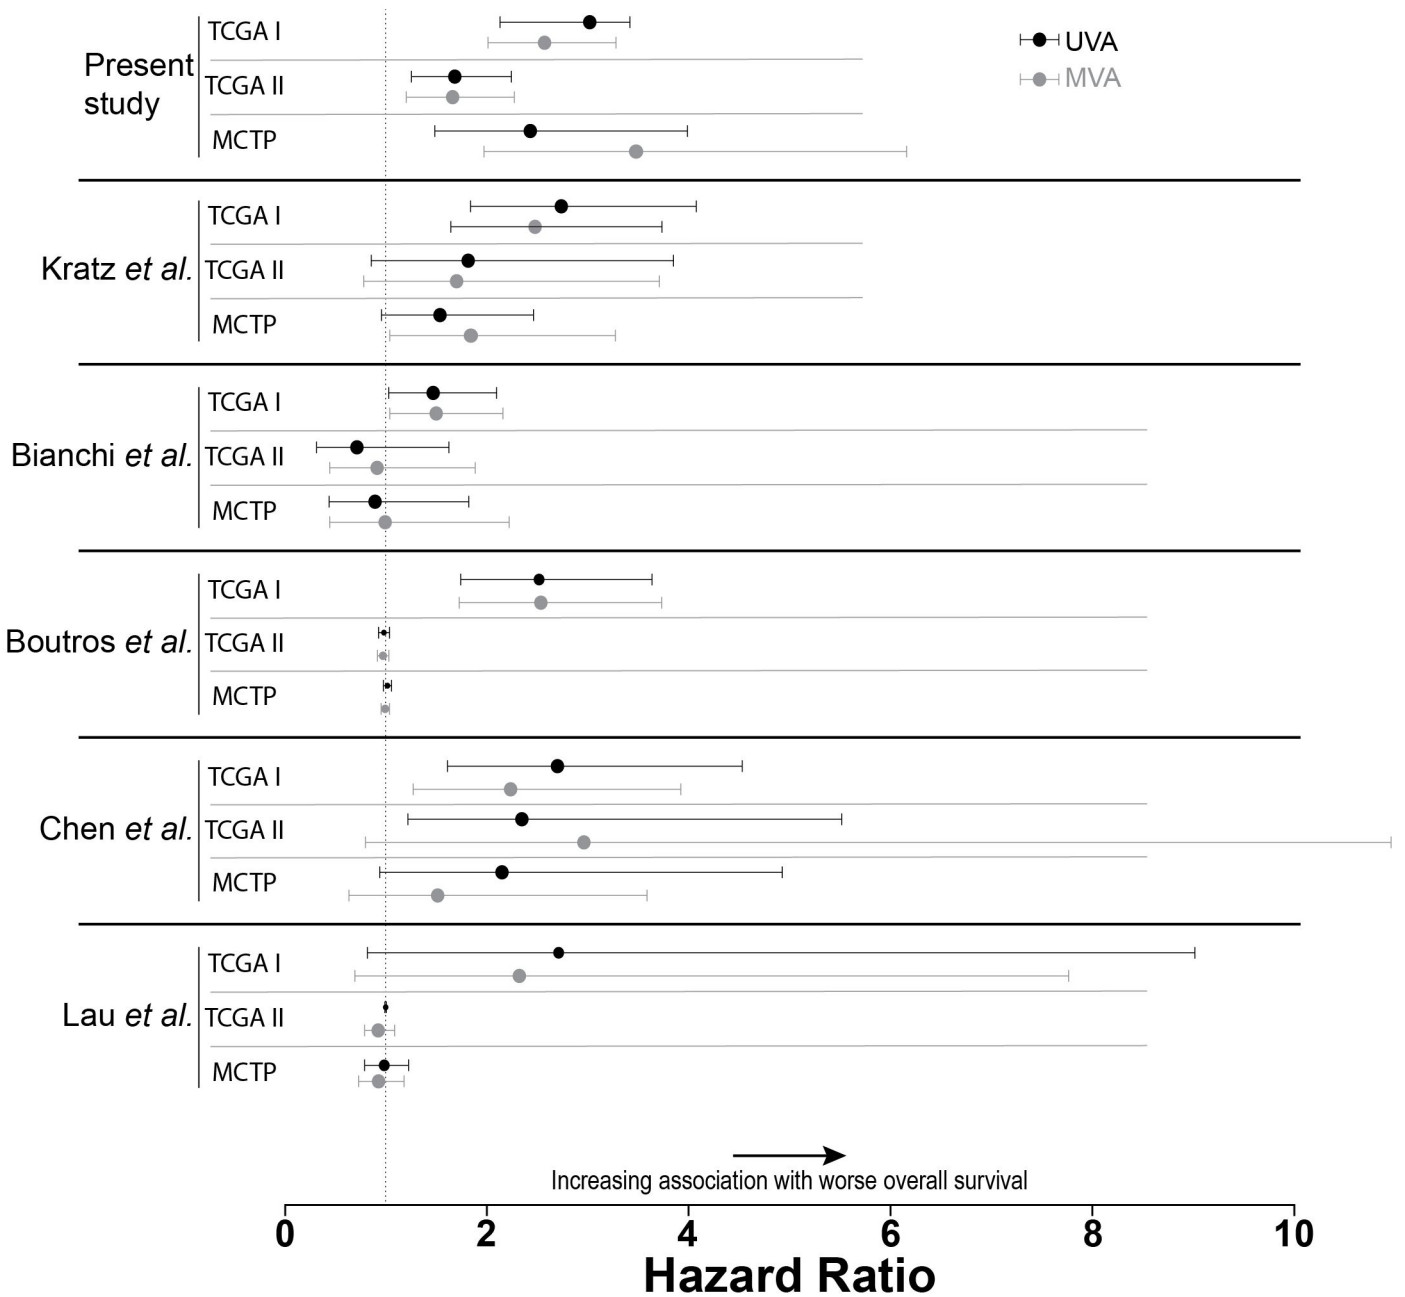

Supplemental Figure 2: Forest plot of Cox proportional hazards models of other published lung signatures in the RNA-seq datasets used in the present study. The signatures are noted at the far left, and divided by the 3 RNA-seq cohorts. For each of the other signatures, coefficients were derived from a multivariate Cox model in TCGA Cohort I, and used to generate a risk score, in the same manner as for the four-gene risk score. Within each cohort, the risk score for each of the other signatures was then evaluated by a univariate (UVA) Cox model, and a multivariate (MVA) Cox model also including the standard variables age, stage, and gender. Data is presented as the hazard ratio point estimate (circle), with 95% CIs (error bars). UVA=univariate Cox model results (black). MVA other=multivariate Cox model results. Point estimate circles were made smaller for visualization of narrow 95% CIs.

# Suppl Fig 3

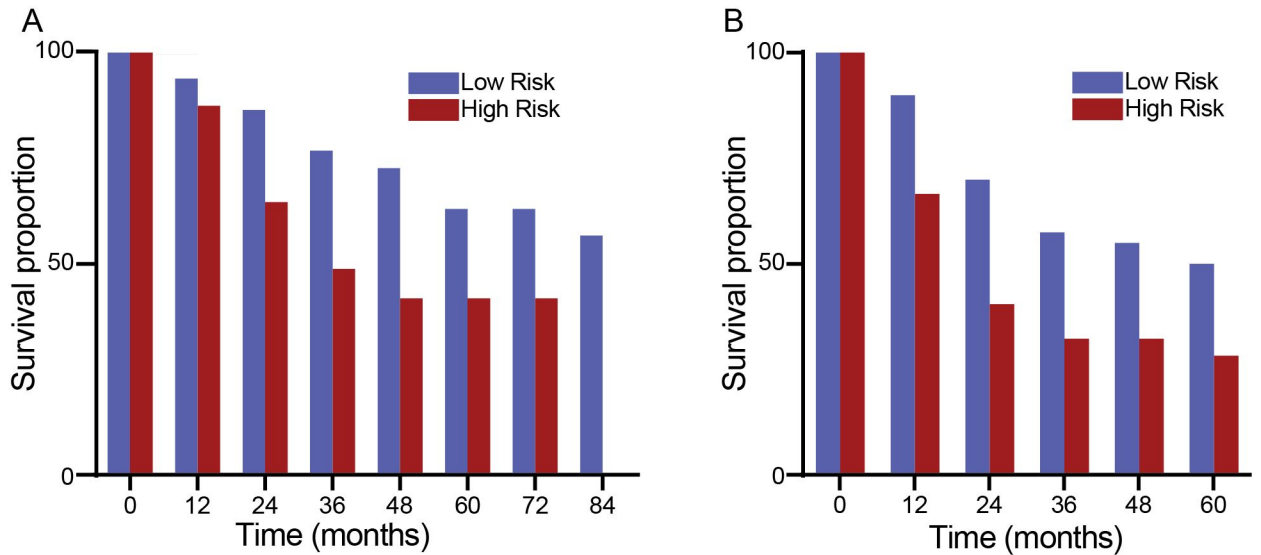

## TCGA Stage II

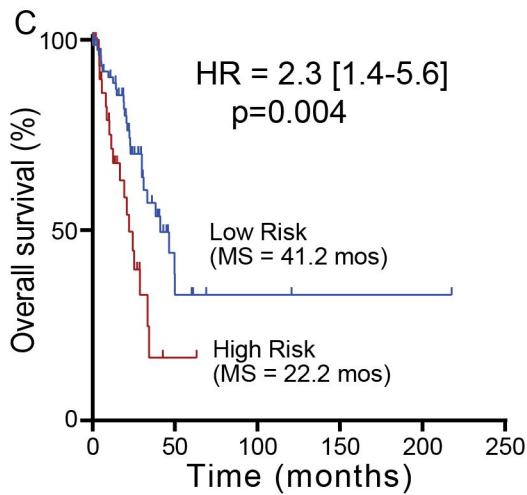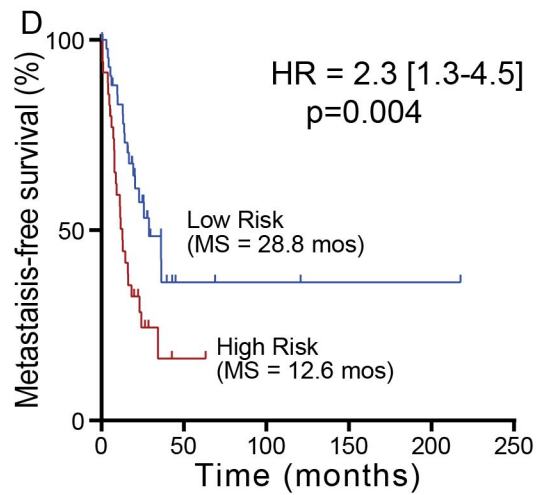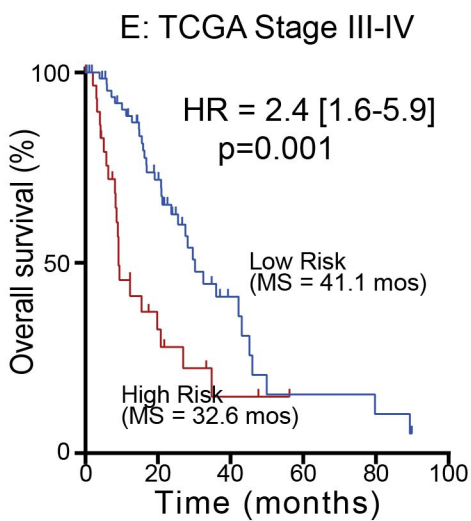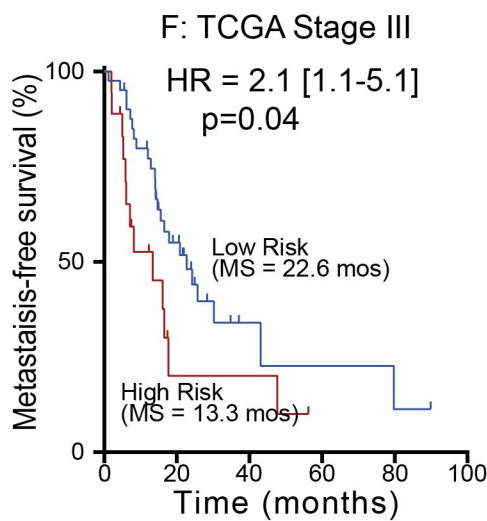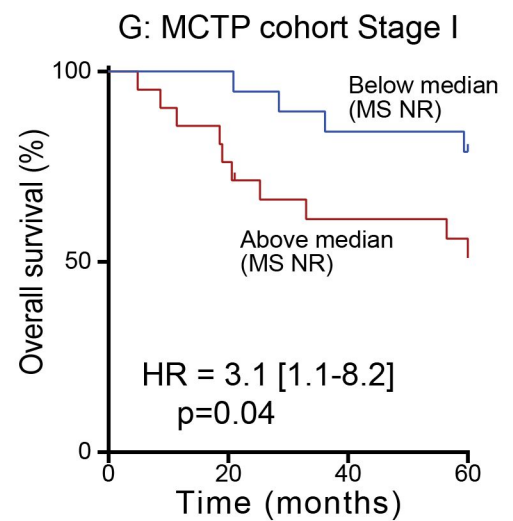

Supplemental Figure 3: Overall survival proportion time-course by 4-gene signature High and Low Risk in the TCGA Cohort II (A) and MCTP Cohort (B). Kaplan-Meier curves with log-rank hazard ratio (HR), 95% CI, and p-value, and median survival for overall survival (C, E, G) and metastasis-free survival (D, F) in Stage II (C, D), Stage III-IV (E) and Stage III (F) cases from TCGA Cohort I. Kaplan-Meier curve of overall survival (G) in the Stage I cases in the MCTP Cohort stratified by the risk score median of the 4-gene signature.

# Suppl Fig 4

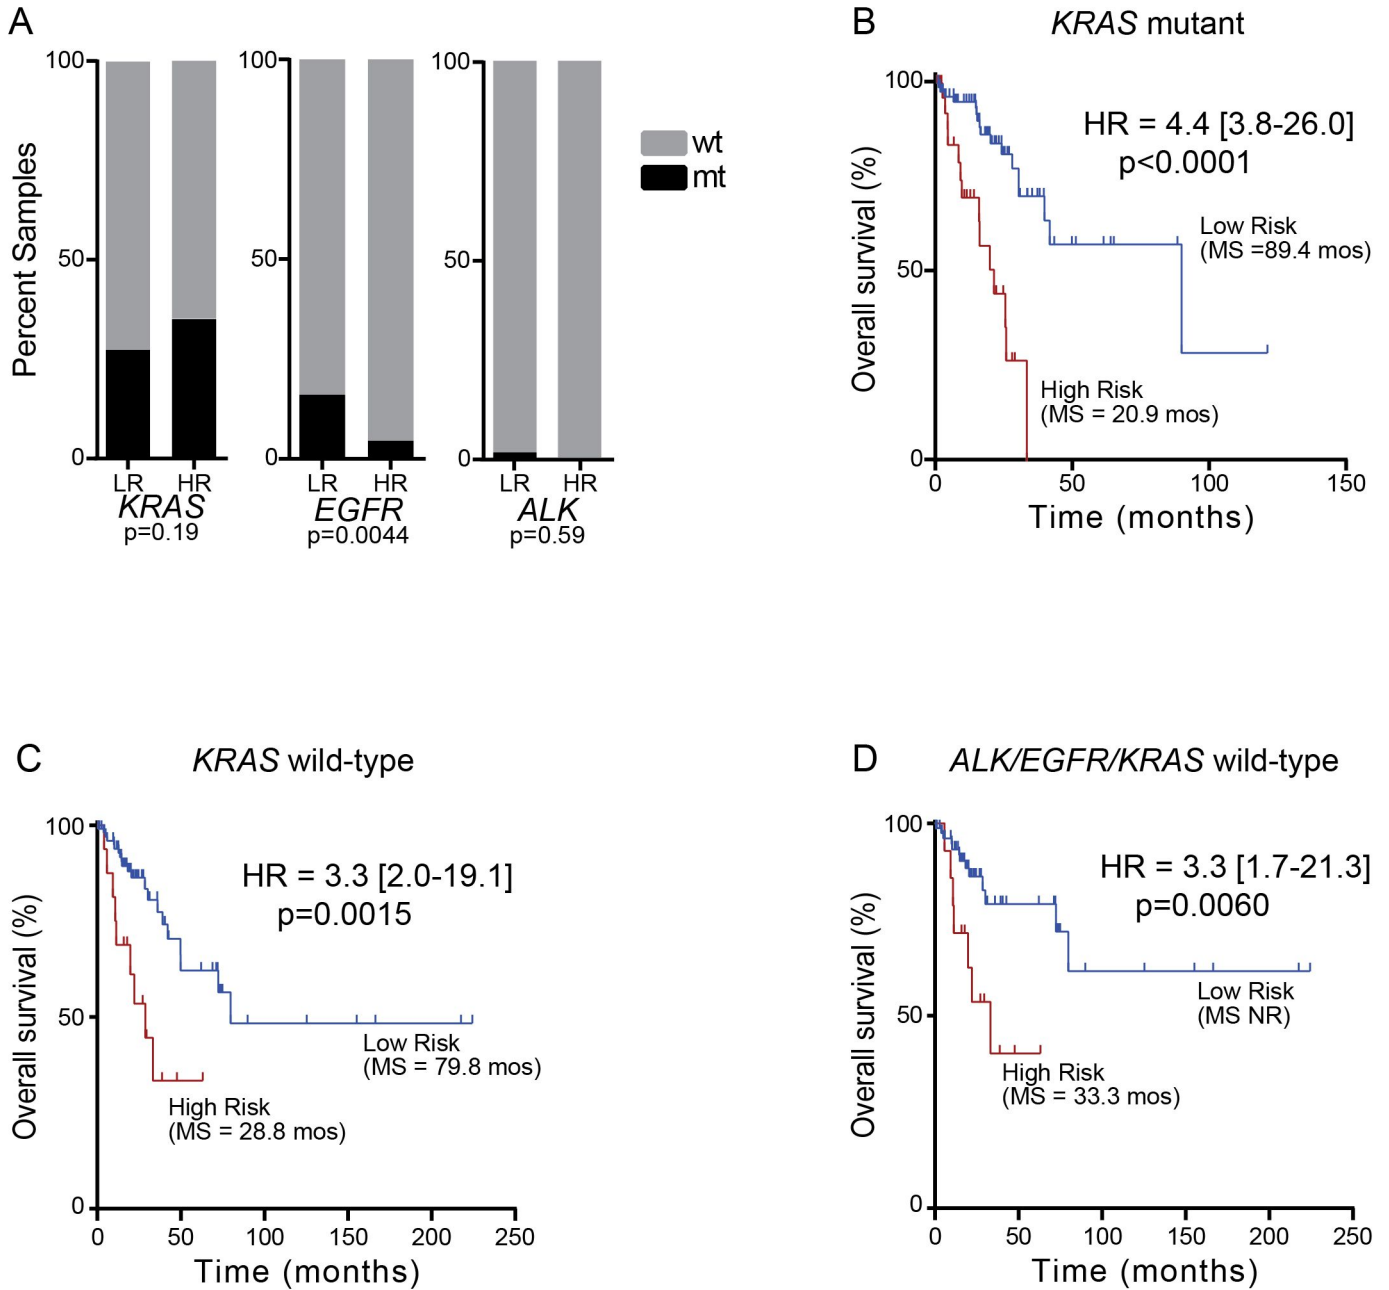

Supplemental Figure 4: (A) *KRAS*, *EGFR*, and *ALK* wild-type (wt) and mutation (mt) proportions by 4-gene prognostic signature Low Risk (LR) or High Risk (HR) in the full TCGA cohort; p-value computed by Fisher's exact test. Kaplan-Meier curves with log-rank hazard ratio (HR), 95% CI, and p-value, and median survival for overall survival of *KRAS* mutant cases from the full TCGA cohort (B), and *KRAS* wild-type (C) and *ALK*, *EGFR*, and *KRAS* wild-type (D) cases from TCGA Cohort II stratified by 4-gene signature High and Low Risk. HR=hazard ratio. mos=months.

**Supplemental Table 1:** Clinical characteristics, follow-up data, and four-gene prognostic signature data in TCGA Cohort I

| ID           | Age (y) | Gender | Smoking |            | ENSG00000104140 | ENSG00000156535 | ENSG00000235884 | ENSG00000156869 | Four-gene Risk Score | Four-gene Risk Group |
|--------------|---------|--------|---------|------------|-----------------|-----------------|-----------------|-----------------|----------------------|----------------------|
|              |         |        | History | Stage      | (RHOV)          | (CD109)         | (LINC00941)     | (FRRS1)         |                      |                      |
| TCGA-50-6597 | 79      | FEMALE | No      | Stage IB   | 1.73            | 0.48            | 0.04            | 0.45            | 0.09                 | Low                  |
| TCGA-49-4486 | 72      | MALE   | Yes     | Stage IA   | 1.92            | 0.14            | 0.13            | 0.56            | 0.09                 | Low                  |
| TCGA-64-1678 | 70      | FEMALE | Yes     | Stage IIA  | 1.38            | 0.58            | 0.16            | 0.23            | 0.10                 | Low                  |
| TCGA-53-7813 | 51      | FEMALE | Yes     | Stage IIIB | 3.69            | 0.35            | 0.07            | 0.36            | 0.10                 | Low                  |
| TCGA-49-4514 | 79      | FEMALE | Yes     | Stage IA   | 7.25            | 0.38            | 0.08            | 0.35            | 0.14                 | Low                  |
| TCGA-78-7167 | 77      | MALE   | Yes     | Stage IV   | 1.59            | 0.95            | 0.03            | 0.91            | 0.15                 | Low                  |
| TCGA-49-4510 | 51      | FEMALE | Yes     | Stage IIB  | 4.25            | 0.86            | 0.18            | 0.34            | 0.16                 | Low                  |
| TCGA-78-7152 | 65      | MALE   | Yes     | Stage IB   | 5.50            | 0.60            | 0.02            | 0.74            | 0.16                 | Low                  |
| TCGA-78-7539 | 75      | FEMALE | Yes     | Stage IIA  | 0.72            | 1.09            | 0.03            | 1.10            | 0.16                 | Low                  |
| TCGA-55-7910 | 50      | FEMALE | Yes     | Stage IIA  | 3.57            | 0.30            | 0.17            | 1.11            | 0.17                 | Low                  |
| TCGA-95-7948 | 42      | FEMALE | Yes     | Stage IB   | 2.14            | 0.37            | 0.18            | 1.31            | 0.17                 | Low                  |
| TCGA-73-4662 | 65      | FEMALE | Yes     | Stage IA   | 0.37            | 0.99            | 0.19            | 0.98            | 0.17                 | Low                  |
| TCGA-78-7163 | 60      | MALE   | Yes     | Stage IB   | 8.36            | 0.08            | 0.28            | 0.44            | 0.18                 | Low                  |
| TCGA-44-6776 | 60      | FEMALE | Yes     | Stage IA   | 2.12            | 0.46            | 0.11            | 1.56            | 0.18                 | Low                  |
| TCGA-44-2657 | 74      | FEMALE | Yes     | Stage IB   | 1.20            | 0.57            | 0.26            | 1.30            | 0.19                 | Low                  |
| TCGA-73-7498 | 58      | FEMALE | Yes     | Stage IA   | 2.34            | 1.01            | 0.22            | 0.87            | 0.19                 | Low                  |
| TCGA-67-3774 | 73      | FEMALE | Yes     | Stage IB   | 2.58            | 1.44            | 0.15            | 0.59            | 0.19                 | Low                  |
| TCGA-50-5935 | 86      | FEMALE | Unknown | Stage IA   | 5.11            | 1.08            | 0.03            | 0.89            | 0.20                 | Low                  |
| TCGA-64-5778 | 60      | MALE   | Yes     | Stage IB   | 7.02            | 0.98            | 0.08            | 0.60            | 0.20                 | Low                  |
| TCGA-78-7633 | 67      | MALE   | Yes     | Stage IA   | 0.81            | 0.93            | 0.01            | 1.76            | 0.20                 | Low                  |
| TCGA-64-1677 | 77      | FEMALE | Yes     | Stage IIIA | 4.43            | 0.97            | 0.21            | 0.71            | 0.20                 | Low                  |
| TCGA-69-8253 | 59      | FEMALE | Yes     | Stage IIA  | 5.96            | 1.24            | 0.11            | 0.53            | 0.20                 | Low                  |
| TCGA-64-1681 | 61      | FEMALE | Yes     | Stage IA   | 4.47            | 1.19            | 0.09            | 0.87            | 0.20                 | Low                  |
| TCGA-91-6849 | 75      | FEMALE | Yes     | Stage IIIA | 2.57            | 1.24            | 0.05            | 1.34            | 0.21                 | Low                  |
| TCGA-73-7499 | 81      | FEMALE | No      | Stage IB   | 4.90            | 0.62            | 0.23            | 1.14            | 0.22                 | Low                  |
| TCGA-44-5645 | 61      | FEMALE | Yes     | Stage IA   | 1.13            | 0.68            | 0.07            | 2.06            | 0.22                 | Low                  |
| TCGA-78-7153 | 65      | FEMALE | Yes     | Stage IB   | 10.32           | 0.37            | 0.23            | 0.59            | 0.22                 | Low                  |
| TCGA-95-7567 | 61      | MALE   | Yes     | Stage IIB  | 9.89            | 0.56            | 0.03            | 0.97            | 0.22                 | Low                  |
| TCGA-35-3615 | 57      | MALE   | No      | Stage IB   | 4.51            | 0.43            | 0.11            | 1.77            | 0.22                 | Low                  |
| TCGA-64-5779 | 61      | MALE   | Yes     | Stage IIIA | 1.31            | 1.58            | 0.18            | 1.07            | 0.22                 | Low                  |
| TCGA-55-6968 | 61      | MALE   | Yes     | Stage IV   | 1.50            | 0.77            | 0.06            | 2.13            | 0.23                 | Low                  |
| TCGA-78-7156 | 62      | MALE   | Yes     | Stage IV   | 0.27            | 0.79            | 0.14            | 2.17            | 0.23                 | Low                  |
| TCGA-50-5932 | 75      | MALE   | Unknown | Stage IIB  | 4.48            | 1.55            | 0.07            | 1.07            | 0.24                 | Low                  |
| TCGA-64-5774 | 60      | MALE   | Yes     | Stage IB   | 2.36            | 1.27            | 0.23            | 1.30            | 0.24                 | Low                  |
| TCGA-05-4432 | 66      | MALE   | Yes     | Stage IIB  | 7.67            | 0.90            | 0.24            | 0.85            | 0.24                 | Low                  |
| TCGA-44-2661 | 69      | FEMALE | No      | Stage IA   | 1.08            | 1.10            | 0.19            | 1.82            | 0.25                 | Low                  |
| TCGA-67-3770 | 70      | FEMALE | Yes     | Stage IA   | 0.66            | 0.63            | 0.04            | 2.69            | 0.25                 | Low                  |
| TCGA-55-8206 | 56      | MALE   | No      | Stage IA   | 1.24            | 1.25            | 0.06            | 2.06            | 0.25                 | Low                  |

|              |    |        |         |            |       |      |      |      |      |     |
|--------------|----|--------|---------|------------|-------|------|------|------|------|-----|
| TCGA-55-7725 | 68 | FEMALE | Yes     | Stage IA   | 4.61  | 1.03 | 0.00 | 1.88 | 0.25 | Low |
| TCGA-50-5055 | 79 | FEMALE | Unknown | Stage IIA  | 3.35  | 1.71 | 0.16 | 1.12 | 0.26 | Low |
| TCGA-67-6217 | 73 | FEMALE | Yes     | Stage IIA  | 0.95  | 0.59 | 0.09 | 2.71 | 0.26 | Low |
| TCGA-86-8279 | 46 | MALE   | No      | Stage IIA  | 5.99  | 1.00 | 0.09 | 1.64 | 0.26 | Low |
| TCGA-49-4501 | 67 | FEMALE | No      | Stage IB   | 1.57  | 1.25 | 0.10 | 2.09 | 0.27 | Low |
| TCGA-55-6969 | 52 | MALE   | Yes     | Stage IB   | 0.64  | 1.34 | 0.30 | 1.70 | 0.27 | Low |
| TCGA-78-7162 | 75 | MALE   | Yes     | Stage IA   | 1.68  | 1.70 | 0.17 | 1.53 | 0.27 | Low |
| TCGA-55-7281 | 70 | FEMALE | Yes     | Stage IA   | 2.78  | 1.76 | 0.24 | 1.14 | 0.27 | Low |
| TCGA-55-8085 | 64 | MALE   | Yes     | Stage IA   | 8.84  | 0.75 | 0.16 | 1.36 | 0.27 | Low |
| TCGA-05-4417 | 51 | FEMALE | Yes     | Stage IB   | 1.02  | 1.61 | 0.34 | 1.39 | 0.27 | Low |
| TCGA-97-8174 | 67 | MALE   | Yes     | Stage IIA  | 0.27  | 1.48 | 0.19 | 1.96 | 0.27 | Low |
| TCGA-67-3772 | 82 | FEMALE | No      | Stage IB   | 1.42  | 1.44 | 0.32 | 1.54 | 0.27 | Low |
| TCGA-44-7659 | 70 | MALE   | Yes     | Stage IA   | 7.13  | 0.73 | 0.14 | 1.75 | 0.27 | Low |
| TCGA-50-5942 | 67 | FEMALE | Yes     | Stage IA   | 1.24  | 0.82 | 0.09 | 2.70 | 0.28 | Low |
| TCGA-55-8301 | 58 | MALE   | Yes     | Stage IB   | 2.72  | 1.74 | 0.22 | 1.40 | 0.28 | Low |
| TCGA-91-6828 | 70 | MALE   | Yes     | Stage IA   | 0.31  | 2.08 | 0.16 | 1.59 | 0.28 | Low |
| TCGA-55-7911 | 70 | FEMALE | Yes     | Stage IA   | 6.99  | 1.73 | 0.07 | 1.11 | 0.28 | Low |
| TCGA-73-4677 | 74 | MALE   | Yes     | Stage IA   | 9.47  | 1.13 | 0.15 | 1.18 | 0.29 | Low |
| TCGA-44-6148 | 60 | MALE   | Yes     | Stage IA   | 4.71  | 0.84 | 0.16 | 2.16 | 0.29 | Low |
| TCGA-05-5423 | 65 | MALE   | Yes     | Stage IIB  | 1.83  | 1.37 | 0.05 | 2.35 | 0.29 | Low |
| TCGA-73-4675 | 59 | MALE   | Yes     | Stage IIIA | 6.33  | 0.83 | 0.20 | 1.92 | 0.29 | Low |
| TCGA-78-7537 | 72 | MALE   | Yes     | Stage IB   | 4.33  | 0.70 | 0.20 | 2.36 | 0.30 | Low |
| TCGA-44-2659 | 65 | FEMALE | Yes     | Stage IIB  | 0.62  | 1.10 | 0.09 | 2.83 | 0.30 | Low |
| TCGA-50-5068 | 59 | FEMALE | Unknown | Stage IIB  | 3.36  | 1.22 | 0.17 | 2.15 | 0.30 | Low |
| TCGA-86-7701 | 66 | MALE   | No      | Stage IV   | 3.53  | 1.02 | 0.67 | 1.19 | 0.30 | Low |
| TCGA-44-2655 | 65 | FEMALE | Yes     | Stage IA   | 11.70 | 0.86 | 0.15 | 1.28 | 0.30 | Low |
| TCGA-38-7271 | 72 | FEMALE | Yes     | Stage IA   | 9.79  | 1.62 | 0.16 | 0.87 | 0.30 | Low |
| TCGA-05-4390 | 58 | FEMALE | Yes     | Stage IB   | 1.84  | 1.12 | 0.33 | 2.18 | 0.30 | Low |
| TCGA-05-4420 | 41 | MALE   | Yes     | Stage IB   | 6.22  | 0.47 | 0.31 | 2.17 | 0.31 | Low |
| TCGA-55-7914 | 71 | FEMALE | Yes     | Stage IIA  | 4.70  | 0.41 | 0.25 | 2.72 | 0.31 | Low |
| TCGA-55-6983 | 81 | MALE   | Yes     | Stage IIB  | 14.55 | 0.74 | 0.27 | 0.89 | 0.32 | Low |
| TCGA-86-8280 | 54 | FEMALE | No      | Stage IIA  | 6.40  | 1.32 | 0.22 | 1.71 | 0.32 | Low |
| TCGA-44-7667 | 49 | FEMALE | Yes     | Stage IIB  | 3.71  | 1.73 | 0.59 | 0.90 | 0.32 | Low |
| TCGA-55-6986 | 74 | FEMALE | No      | Stage IB   | 7.85  | 0.96 | 0.54 | 1.09 | 0.32 | Low |
| TCGA-99-8028 | 50 | FEMALE | Yes     | Stage IA   | 9.92  | 1.41 | 0.30 | 0.93 | 0.32 | Low |
| TCGA-50-5944 | 69 | FEMALE | Unknown | Stage IA   | 1.09  | 1.55 | 0.05 | 2.73 | 0.32 | Low |
| TCGA-97-7546 | 76 | FEMALE | Yes     | Stage IA   | 0.56  | 1.68 | 0.08 | 2.66 | 0.32 | Low |
| TCGA-78-7143 | 62 | FEMALE | No      | Stage IB   | 2.95  | 2.27 | 0.11 | 1.68 | 0.32 | Low |
| TCGA-64-1680 | 63 | MALE   | Yes     | Stage IV   | 4.90  | 0.38 | 0.25 | 2.85 | 0.33 | Low |
| TCGA-91-6840 | 59 | FEMALE | Yes     | Stage IA   | 3.37  | 0.82 | 0.79 | 1.48 | 0.33 | Low |
| TCGA-78-7536 | 69 | MALE   | Yes     | Stage IIIA | 4.99  | 0.39 | 0.06 | 3.31 | 0.33 | Low |
| TCGA-44-5644 | 51 | FEMALE | Yes     | Stage IB   | 2.50  | 1.82 | 0.93 | 0.41 | 0.33 | Low |
| TCGA-50-6591 | 63 | FEMALE | No      | Stage IV   | 0.71  | 2.54 | 0.51 | 1.03 | 0.33 | Low |

|              |    |        |         |            |       |      |      |      |      |     |
|--------------|----|--------|---------|------------|-------|------|------|------|------|-----|
| TCGA-67-3773 | 84 | FEMALE | Yes     | Stage IB   | 2.47  | 0.51 | 0.27 | 3.17 | 0.33 | Low |
| TCGA-05-4430 | 59 | FEMALE | Yes     | Stage IB   | 3.36  | 2.33 | 0.22 | 1.53 | 0.34 | Low |
| TCGA-05-4405 | 74 | FEMALE | Yes     | Stage IB   | 5.03  | 2.25 | 0.06 | 1.80 | 0.34 | Low |
| TCGA-91-7771 | 62 | MALE   | Yes     | Stage IIB  | 2.27  | 1.73 | 0.16 | 2.46 | 0.34 | Low |
| TCGA-64-1676 | 58 | MALE   | Yes     | Stage IA   | 6.56  | 3.21 | 0.06 | 0.72 | 0.35 | Low |
| TCGA-69-7973 | 42 | FEMALE | Yes     | Stage IB   | 5.99  | 1.03 | 0.64 | 1.51 | 0.35 | Low |
| TCGA-91-6831 | 66 | MALE   | Yes     | Stage IB   | 4.14  | 1.95 | 0.37 | 1.58 | 0.35 | Low |
| TCGA-69-7764 | 75 | MALE   | Yes     | Stage IA   | 1.89  | 1.97 | 0.30 | 2.11 | 0.35 | Low |
| TCGA-93-7348 | 75 | FEMALE | Yes     | Stage IA   | 6.94  | 2.03 | 0.16 | 1.63 | 0.35 | Low |
| TCGA-69-7763 | 69 | MALE   | Yes     | Stage IA   | 11.24 | 1.99 | 0.28 | 0.78 | 0.36 | Low |
| TCGA-55-7574 | 64 | FEMALE | Yes     | Stage IB   | 2.82  | 2.09 | 0.69 | 1.07 | 0.36 | Low |
| TCGA-38-4630 | 75 | FEMALE | No      | Stage IB   | 3.10  | 1.28 | 0.31 | 2.76 | 0.37 | Low |
| TCGA-86-8054 | 61 | MALE   | Yes     | Stage IIB  | 2.03  | 1.23 | 0.69 | 2.17 | 0.37 | Low |
| TCGA-73-4659 | 66 | MALE   | Yes     | Stage IIIA | 11.89 | 1.39 | 0.37 | 1.27 | 0.37 | Low |
| TCGA-97-7547 | 67 | FEMALE | Yes     | Stage IB   | 1.96  | 3.21 | 0.23 | 1.44 | 0.37 | Low |
| TCGA-38-4626 | 57 | FEMALE | Yes     | Stage IIA  | 0.93  | 2.65 | 0.38 | 1.81 | 0.38 | Low |
| TCGA-78-7159 | 60 | FEMALE | Yes     | Stage IA   | 6.64  | 1.09 | 0.80 | 1.50 | 0.38 | Low |
| TCGA-44-7671 | 64 | MALE   | Yes     | Stage IB   | 6.08  | 2.07 | 0.09 | 2.30 | 0.38 | Low |
| TCGA-78-7149 | 71 | MALE   | Yes     | Stage IIIB | 20.91 | 1.04 | 0.13 | 0.94 | 0.39 | Low |
| TCGA-73-4658 | 80 | FEMALE | Yes     | Stage IB   | 3.40  | 3.56 | 0.17 | 1.31 | 0.39 | Low |
| TCGA-44-6147 | 67 | FEMALE | Yes     | Stage IA   | 10.82 | 1.99 | 0.16 | 1.65 | 0.40 | Low |
| TCGA-05-4249 | 67 | MALE   | Yes     | Stage IB   | 4.43  | 3.07 | 0.07 | 1.96 | 0.40 | Low |
| TCGA-99-8025 | 72 | FEMALE | Yes     | Stage IIIA | 16.29 | 1.64 | 0.34 | 0.84 | 0.40 | Low |
| TCGA-50-5049 | 70 | MALE   | Unknown | Stage IA   | 1.37  | 1.41 | 0.16 | 3.77 | 0.40 | Low |
| TCGA-38-6178 | 70 | FEMALE | No      | Stage IIIA | 1.38  | 2.47 | 0.16 | 2.79 | 0.41 | Low |
| TCGA-49-6744 | 64 | FEMALE | Yes     | Stage IIA  | 2.56  | 3.23 | 0.18 | 1.88 | 0.41 | Low |
| TCGA-69-7980 | 69 | FEMALE | Yes     | Stage I    | 0.76  | 4.25 | 0.25 | 1.11 | 0.41 | Low |
| TCGA-53-7626 | 76 | FEMALE | Yes     | Stage IIA  | 7.94  | 2.07 | 0.19 | 2.17 | 0.41 | Low |
| TCGA-97-8177 | 59 | FEMALE | No      | Stage IB   | 1.26  | 2.28 | 0.17 | 3.07 | 0.41 | Low |
| TCGA-49-4505 | 61 | FEMALE | Yes     | Stage IIB  | 11.10 | 2.53 | 0.05 | 1.69 | 0.42 | Low |
| TCGA-50-5941 | 55 | FEMALE | Yes     | Stage IIIA | 12.09 | 2.14 | 0.17 | 1.66 | 0.42 | Low |
| TCGA-86-7713 | 70 | MALE   | No      | Stage IIA  | 11.57 | 0.94 | 0.18 | 2.84 | 0.42 | Low |
| TCGA-55-6971 | 59 | FEMALE | Yes     | Stage IB   | 3.49  | 2.41 | 0.53 | 1.97 | 0.42 | Low |
| TCGA-55-1595 | 74 | FEMALE | Yes     | Stage IA   | 13.10 | 2.20 | 0.25 | 1.33 | 0.43 | Low |
| TCGA-97-7938 | 76 | FEMALE | Yes     | Stage IA   | 7.09  | 1.63 | 0.28 | 2.73 | 0.43 | Low |
| TCGA-05-4389 | 70 | MALE   | Yes     | Stage IA   | 3.19  | 2.51 | 0.17 | 2.80 | 0.43 | Low |
| TCGA-67-3771 | 77 | FEMALE | Yes     | Stage IA   | 8.24  | 0.69 | 0.18 | 3.68 | 0.43 | Low |
| TCGA-50-6593 | 49 | FEMALE | Yes     | Stage IIIA | 12.72 | 3.13 | 0.02 | 1.17 | 0.43 | Low |
| TCGA-55-6642 | 63 | MALE   | Yes     | Stage IB   | 5.15  | 2.78 | 0.50 | 1.56 | 0.43 | Low |
| TCGA-44-7660 | 72 | MALE   | Yes     | Stage IB   | 10.60 | 0.76 | 0.28 | 3.14 | 0.44 | Low |
| TCGA-44-3918 | 60 | FEMALE | Yes     | Stage IA   | 9.16  | 3.07 | 0.16 | 1.70 | 0.45 | Low |
| TCGA-35-5375 | 61 | MALE   | Yes     | Stage IIIA | 3.39  | 1.28 | 0.21 | 4.11 | 0.45 | Low |
| TCGA-55-7903 | 64 | MALE   | Yes     | Stage IA   | 4.94  | 4.05 | 0.05 | 1.72 | 0.45 | Low |

|              |    |        |     |            |       |      |      |      |      |     |
|--------------|----|--------|-----|------------|-------|------|------|------|------|-----|
| TCGA-69-7760 | 73 | MALE   | No  | Stage IIB  | 9.81  | 3.67 | 0.10 | 1.24 | 0.46 | Low |
| TCGA-91-6836 | 52 | FEMALE | Yes | Stage IB   | 1.57  | 5.32 | 0.08 | 1.05 | 0.46 | Low |
| TCGA-78-7147 | 67 | FEMALE | Yes | Stage IIB  | 1.45  | 1.89 | 0.05 | 4.27 | 0.46 | Low |
| TCGA-55-7995 | 73 | FEMALE | Yes | Stage IA   | 8.29  | 2.19 | 0.18 | 2.82 | 0.47 | Low |
| TCGA-55-7815 | 76 | MALE   | No  | Stage IB   | 1.50  | 2.26 | 0.11 | 3.98 | 0.47 | Low |
| TCGA-55-8207 | 73 | MALE   | Yes | Stage IB   | 3.39  | 4.00 | 0.03 | 2.41 | 0.48 | Low |
| TCGA-05-4424 | 70 | MALE   | Yes | Stage IIB  | 4.21  | 3.03 | 0.12 | 2.99 | 0.48 | Low |
| TCGA-99-8032 | 61 | MALE   | Yes | Stage IA   | 9.36  | 1.58 | 1.25 | 0.96 | 0.48 | Low |
| TCGA-55-1594 | 68 | MALE   | Yes | Stage IIIA | 3.93  | 2.66 | 0.93 | 1.67 | 0.49 | Low |
| TCGA-86-7953 | 69 | FEMALE | No  | Stage IA   | 2.69  | 2.62 | 0.45 | 3.03 | 0.49 | Low |
| TCGA-55-1596 | 55 | MALE   | Yes | Stage IIB  | 13.65 | 0.81 | 0.15 | 3.75 | 0.50 | Low |
| TCGA-86-8076 | 42 | MALE   | No  | Stage IA   | 25.54 | 1.33 | 0.15 | 1.52 | 0.50 | Low |
| TCGA-44-8120 | 58 | MALE   | Yes | Stage IB   | 7.31  | 3.39 | 0.05 | 2.74 | 0.51 | Low |
| TCGA-49-6761 | 68 | FEMALE | Yes | Stage IIIA | 6.68  | 3.74 | 0.56 | 1.40 | 0.51 | Low |
| TCGA-44-7669 | 59 | MALE   | Yes | Stage IIA  | 2.33  | 2.45 | 1.00 | 2.26 | 0.51 | Low |
| TCGA-50-5066 | 72 | MALE   | No  | Stage IB   | 0.29  | 3.37 | 1.19 | 1.31 | 0.51 | Low |
| TCGA-05-5428 | 57 | MALE   | Yes | Stage IIA  | 7.75  | 3.04 | 0.20 | 2.76 | 0.52 | Low |
| TCGA-55-8091 | 74 | MALE   | Yes | Stage IB   | 15.62 | 3.08 | 0.24 | 1.45 | 0.52 | Low |
| TCGA-55-7227 | 77 | MALE   | Yes | Stage IIIA | 21.97 | 2.39 | 0.16 | 1.33 | 0.52 | Low |
| TCGA-44-3919 | 71 | FEMALE | No  | Stage IA   | 7.96  | 3.99 | 0.08 | 2.20 | 0.52 | Low |
| TCGA-55-6982 | 79 | FEMALE | No  | Stage IIB  | 11.40 | 2.63 | 0.26 | 2.53 | 0.52 | Low |
| TCGA-44-4112 | 60 | FEMALE | Yes | Stage IB   | 3.70  | 4.24 | 0.50 | 1.70 | 0.52 | Low |
| TCGA-38-4631 | 72 | FEMALE | Yes | Stage IB   | 8.17  | 1.55 | 0.42 | 3.94 | 0.55 | Low |
| TCGA-67-6216 | 57 | FEMALE | No  | Stage IA   | 23.57 | 1.14 | 0.32 | 2.26 | 0.55 | Low |
| TCGA-69-7765 | 56 | MALE   | Yes | Stage IV   | 2.29  | 5.04 | 0.24 | 2.32 | 0.56 | Low |
| TCGA-86-7714 | 61 | FEMALE | Yes | Stage IIIA | 13.84 | 2.27 | 0.21 | 3.32 | 0.57 | Low |
| TCGA-50-5946 | 62 | MALE   | Yes | Stage IA   | 14.90 | 1.60 | 0.20 | 4.15 | 0.60 | Low |
| TCGA-55-7907 | 77 | MALE   | Yes | Stage IIA  | 7.36  | 6.66 | 0.25 | 1.01 | 0.63 | Low |
| TCGA-44-2656 | 59 | MALE   | Yes | Stage IB   | 5.47  | 5.98 | 0.20 | 2.16 | 0.64 | Low |
| TCGA-97-7552 | 70 | MALE   | Yes | Stage IB   | 7.61  | 1.75 | 1.25 | 3.35 | 0.64 | Low |
| TCGA-55-6980 | 56 | MALE   | No  | Stage IA   | 7.77  | 6.38 | 0.06 | 1.92 | 0.65 | Low |
| TCGA-55-5899 | 58 | MALE   | Yes | Stage IA   | 0.42  | 4.86 | 0.56 | 3.35 | 0.66 | Low |
| TCGA-95-7947 | 67 | MALE   | Yes | Stage IA   | 26.64 | 1.89 | 0.09 | 3.13 | 0.66 | Low |
| TCGA-05-4403 | 76 | MALE   | Yes | Stage IB   | 4.22  | 5.16 | 0.43 | 2.79 | 0.66 | Low |
| TCGA-44-6774 | 56 | FEMALE | Yes | Stage IIIA | 2.24  | 5.86 | 0.74 | 1.75 | 0.66 | Low |
| TCGA-55-7570 | 60 | MALE   | Yes | Stage IA   | 14.47 | 1.14 | 0.34 | 5.17 | 0.66 | Low |
| TCGA-05-4384 | 66 | MALE   | Yes | Stage IIIA | 21.16 | 4.17 | 0.10 | 1.97 | 0.67 | Low |
| TCGA-55-6543 | 60 | FEMALE | Yes | Stage IA   | 38.08 | 2.20 | 0.11 | 1.21 | 0.67 | Low |
| TCGA-73-4668 | 66 | FEMALE | Yes | Stage IIB  | 3.33  | 6.51 | 0.32 | 2.15 | 0.67 | Low |
| TCGA-44-2666 | 43 | MALE   | Yes | Stage IB   | 12.32 | 3.60 | 0.82 | 2.32 | 0.67 | Low |
| TCGA-55-6981 | 53 | FEMALE | Yes | Stage IIIA | 13.97 | 3.92 | 0.21 | 3.17 | 0.67 | Low |
| TCGA-86-8075 | 66 | FEMALE | No  | Stage IB   | 1.45  | 4.22 | 0.31 | 4.58 | 0.68 | Low |
| TCGA-78-7145 | 52 | FEMALE | Yes | Stage IV   | 8.92  | 7.20 | 0.07 | 1.31 | 0.68 | Low |



|              |    |        |     |            |       |       |      |      |      |      |
|--------------|----|--------|-----|------------|-------|-------|------|------|------|------|
| TCGA-55-7994 | 81 | MALE   | Yes | Stage IIB  | 12.85 | 4.10  | 0.16 | 3.83 | 0.71 | Low  |
| TCGA-55-7727 | 70 | MALE   | Yes | Stage IIIA | 9.93  | 7.45  | 0.03 | 1.84 | 0.74 | Low  |
| TCGA-55-7728 | 64 | FEMALE | Yes | Stage IB   | 6.08  | 2.79  | 2.13 | 1.96 | 0.74 | Low  |
| TCGA-38-4632 | 42 | MALE   | Yes | Stage IV   | 7.85  | 8.46  | 0.11 | 1.09 | 0.74 | Low  |
| TCGA-05-4396 | 76 | MALE   | Yes | Stage IIIB | 17.39 | 0.97  | 0.08 | 6.72 | 0.75 | Low  |
| TCGA-78-7535 | 45 | MALE   | Yes | Stage IB   | 53.86 | 1.26  | 0.05 | 1.06 | 0.76 | Low  |
| TCGA-05-5425 | 68 | MALE   | Yes | Stage IIB  | 13.85 | 2.24  | 0.06 | 6.58 | 0.78 | Low  |
| TCGA-78-7160 | 61 | MALE   | Yes | Stage IV   | 10.57 | 7.34  | 0.22 | 2.11 | 0.79 | Low  |
| TCGA-05-5420 | 67 | MALE   | Yes | Stage IIIA | 14.49 | 2.10  | 0.29 | 6.19 | 0.79 | Low  |
| TCGA-69-7974 | 54 | FEMALE | Yes | Stage IIIA | 7.59  | 5.82  | 1.00 | 2.34 | 0.80 | Low  |
| TCGA-49-4488 | 74 | FEMALE | Yes | Stage IA   | 15.92 | 8.34  | 0.10 | 0.89 | 0.81 | Low  |
| TCGA-91-6847 | 62 | FEMALE | Yes | Stage IB   | 6.20  | 5.34  | 1.39 | 2.50 | 0.83 | Low  |
| TCGA-55-8090 | 80 | MALE   | Yes | Stage IA   | 21.36 | 6.48  | 0.70 | 1.03 | 0.85 | Low  |
| TCGA-55-1592 | 65 | MALE   | Yes | Stage IA   | 6.91  | 2.09  | 0.10 | 8.73 | 0.86 | Low  |
| TCGA-38-4627 | 64 | FEMALE | Yes | Stage IIA  | 3.06  | 6.97  | 0.65 | 3.68 | 0.86 | Low  |
| TCGA-44-7672 | 52 | FEMALE | Yes | Stage IA   | 4.28  | 11.49 | 0.22 | 0.74 | 0.90 | Low  |
| TCGA-35-4123 | 38 | MALE   | Yes | Stage IA   | 5.83  | 5.99  | 1.53 | 2.63 | 0.90 | Low  |
| TCGA-55-8096 | 67 | FEMALE | Yes | Stage IB   | 3.63  | 5.26  | 0.25 | 6.56 | 0.90 | Low  |
| TCGA-44-8117 | 54 | FEMALE | Yes | Stage IB   | 71.27 | 0.65  | 0.22 | 0.78 | 0.92 | Low  |
| TCGA-35-4122 | 69 | MALE   | Yes | Stage IA   | 1.91  | 5.42  | 2.42 | 2.27 | 0.94 | Low  |
| TCGA-44-3396 | 74 | FEMALE | Yes | Stage IIIA | 35.62 | 5.08  | 0.37 | 2.24 | 0.95 | Low  |
| TCGA-78-7540 | 66 | FEMALE | No  | Stage IB   | 8.38  | 1.47  | 2.70 | 4.64 | 0.96 | Low  |
| TCGA-05-4402 | 57 | FEMALE | No  | Stage IV   | 16.13 | 5.15  | 0.17 | 6.00 | 0.98 | Low  |
| TCGA-64-1679 | 58 | FEMALE | Yes | Stage IIIA | 6.85  | 9.96  | 0.39 | 2.63 | 0.99 | High |
| TCGA-44-6777 | 85 | FEMALE | Yes | Stage IB   | 2.06  | 7.19  | 0.20 | 6.48 | 1.00 | High |
| TCGA-05-4426 | 71 | MALE   | Yes | Stage IB   | 20.09 | 7.87  | 0.29 | 3.02 | 1.00 | High |
| TCGA-44-6146 | 64 | MALE   | Yes | Stage IIB  | 2.62  | 1.08  | 3.98 | 3.58 | 1.01 | High |
| TCGA-55-8094 | 51 | MALE   | Yes | Stage IV   | 3.13  | 4.15  | 3.89 | 1.01 | 1.02 | High |
| TCGA-44-7670 | 47 | FEMALE | Yes | Stage IIA  | 6.94  | 2.53  | 2.93 | 4.41 | 1.04 | High |
| TCGA-71-6725 | 48 | FEMALE | Yes | Stage IB   | 89.36 | 0.59  | 0.03 | 0.65 | 1.07 | High |
| TCGA-86-6562 | 52 | MALE   | No  | Stage IIA  | 37.96 | 7.89  | 0.23 | 1.47 | 1.08 | High |
| TCGA-55-6712 | 71 | MALE   | Yes | Stage IIA  | 3.53  | 0.01  | 4.95 | 3.59 | 1.10 | High |
| TCGA-44-6775 | 72 | FEMALE | Yes | Stage IB   | 1.88  | 10.12 | 0.48 | 4.76 | 1.11 | High |
| TCGA-05-5715 | 69 | FEMALE | No  | Stage IB   | 50.23 | 5.36  | 0.04 | 2.88 | 1.12 | High |
| TCGA-78-7148 | 71 | MALE   | Yes | Stage IIB  | 18.55 | 12.69 | 0.07 | 1.44 | 1.16 | High |
| TCGA-50-6594 | 79 | FEMALE | Yes | Stage IIIA | 19.66 | 11.59 | 0.19 | 2.23 | 1.17 | High |
| TCGA-97-7941 | 72 | FEMALE | Yes | Stage IA   | 21.33 | 3.05  | 3.21 | 3.12 | 1.18 | High |
| TCGA-91-6829 | 78 | MALE   | Yes | Stage IB   | 0.36  | 11.84 | 0.67 | 4.80 | 1.24 | High |
| TCGA-05-4397 | 65 | MALE   | Yes | Stage IIB  | 4.15  | 7.50  | 0.20 | 9.42 | 1.25 | High |
| TCGA-44-2665 | 55 | FEMALE | No  | Stage IIB  | 30.27 | 9.08  | 1.02 | 2.16 | 1.25 | High |
| TCGA-69-7978 | 59 | MALE   | Yes | Stage IIB  | 20.36 | 9.41  | 1.11 | 3.23 | 1.26 | High |
| TCGA-44-6145 | 62 | FEMALE | Yes | Stage IA   | 40.35 | 8.68  | 0.16 | 3.17 | 1.27 | High |
| TCGA-69-7761 | 84 | MALE   | Yes | Stage IB   | 12.00 | 3.05  | 2.11 | 8.35 | 1.28 | High |

|              |    |        |         |            |        |       |       |       |      |      |
|--------------|----|--------|---------|------------|--------|-------|-------|-------|------|------|
| TCGA-93-8067 | 77 | MALE   | Yes     | Stage IB   | 7.59   | 16.43 | 0.22  | 1.26  | 1.29 | High |
| TCGA-55-7284 | 74 | MALE   | Yes     | Stage IIB  | 7.15   | 2.34  | 4.80  | 3.88  | 1.29 | High |
| TCGA-49-6742 | 70 | MALE   | Yes     | Stage IIB  | 94.05  | 1.49  | 0.04  | 4.31  | 1.45 | High |
| TCGA-55-8205 | 76 | FEMALE | Yes     | Stage IIB  | 5.06   | 9.92  | 3.75  | 1.88  | 1.46 | High |
| TCGA-49-4507 | 73 | FEMALE | Yes     | Stage IIIA | 104.01 | 1.29  | 1.17  | 0.76  | 1.47 | High |
| TCGA-55-6970 | 67 | FEMALE | Yes     | Stage IIIA | 66.80  | 7.29  | 0.09  | 3.43  | 1.48 | High |
| TCGA-91-6848 | 59 | MALE   | Yes     | Stage IIIA | 1.02   | 10.27 | 3.47  | 3.20  | 1.49 | High |
| TCGA-50-6590 | 72 | FEMALE | Yes     | Stage IB   | 16.32  | 4.39  | 5.59  | 2.16  | 1.54 | High |
| TCGA-44-7662 | 61 | MALE   | Yes     | Stage IB   | 2.74   | 17.92 | 1.17  | 1.95  | 1.54 | High |
| TCGA-55-7576 | 54 | MALE   | Yes     | Stage IB   | 4.89   | 20.09 | 0.23  | 2.23  | 1.58 | High |
| TCGA-64-5815 | 74 | MALE   | Yes     | Stage IIB  | 25.29  | 14.33 | 1.30  | 2.19  | 1.59 | High |
| TCGA-78-7220 | 53 | FEMALE | Yes     | Stage IIIA | 94.29  | 1.26  | 1.78  | 3.86  | 1.69 | High |
| TCGA-64-5781 | 55 | FEMALE | Yes     | Stage IB   | 67.58  | 4.33  | 2.68  | 3.89  | 1.75 | High |
| TCGA-44-5643 | 53 | MALE   | Yes     | Stage IIIA | 68.52  | 6.24  | 1.35  | 5.29  | 1.77 | High |
| TCGA-97-8175 | 55 | FEMALE | Yes     | Stage IB   | 31.01  | 12.48 | 2.53  | 3.36  | 1.82 | High |
| TCGA-49-6743 | 81 | FEMALE | Yes     | Stage IIIA | 52.09  | 15.51 | 0.19  | 3.28  | 1.86 | High |
| TCGA-91-6830 | 65 | FEMALE | Yes     | Stage IIA  | 41.46  | 17.77 | 0.21  | 2.93  | 1.87 | High |
| TCGA-73-4676 | 45 | MALE   | Yes     | Stage IIA  | 8.17   | 22.76 | 0.20  | 3.67  | 1.89 | High |
| TCGA-05-4250 | 79 | FEMALE | Yes     | Stage IIIA | 14.34  | 13.63 | 4.76  | 2.21  | 1.99 | High |
| TCGA-50-6592 | 71 | FEMALE | Yes     | Stage IB   | 9.76   | 1.21  | 6.84  | 9.94  | 2.02 | High |
| TCGA-55-6978 | 81 | MALE   | No      | Stage IIA  | 7.33   | 12.52 | 6.23  | 1.45  | 2.03 | High |
| TCGA-05-4433 | 82 | MALE   | Yes     | Stage IB   | 1.53   | 8.80  | 7.39  | 3.49  | 2.05 | High |
| TCGA-49-6767 | 46 | FEMALE | Yes     | Stage IIB  | 12.27  | 14.88 | 4.91  | 2.25  | 2.08 | High |
| TCGA-44-2668 | 51 | MALE   | Yes     | Stage IB   | 10.16  | 12.77 | 5.98  | 2.17  | 2.09 | High |
| TCGA-53-7624 | 40 | FEMALE | Yes     | Stage IV   | 114.02 | 6.72  | 0.10  | 5.78  | 2.13 | High |
| TCGA-86-7711 | 70 | MALE   | Yes     | Stage IIA  | 120.34 | 1.05  | 0.29  | 10.15 | 2.17 | High |
| TCGA-49-6745 | 82 | MALE   | Yes     | Stage IIIA | 7.27   | 17.14 | 5.59  | 1.96  | 2.26 | High |
| TCGA-55-7724 | 76 | FEMALE | Yes     | Stage IB   | 10.39  | 25.22 | 0.33  | 6.49  | 2.30 | High |
| TCGA-50-5044 | 72 | FEMALE | Unknown | Stage IIIB | 3.14   | 8.96  | 10.47 | 0.38  | 2.36 | High |
| TCGA-55-6984 | 71 | FEMALE | Unknown | Stage IIB  | 21.07  | 3.06  | 10.18 | 4.36  | 2.41 | High |
| TCGA-83-5908 | 59 | FEMALE | Yes     | Stage IA   | 21.39  | 22.83 | 3.15  | 2.58  | 2.44 | High |
| TCGA-50-5936 | 58 | MALE   | Unknown | Stage IIIA | 141.28 | 5.33  | 0.80  | 7.04  | 2.54 | High |
| TCGA-44-6779 | 50 | FEMALE | Yes     | Stage IIB  | 27.41  | 16.91 | 5.71  | 5.97  | 2.78 | High |
| TCGA-55-6975 | 61 | MALE   | Yes     | Stage IIB  | 127.99 | 14.02 | 1.57  | 2.72  | 2.78 | High |
| TCGA-50-6673 | 84 | FEMALE | No      | Stage I    | 7.55   | 33.13 | 2.70  | 2.45  | 2.89 | High |
| TCGA-50-6595 | 74 | FEMALE | Yes     | Stage IIIA | 5.92   | 26.06 | 7.05  | 2.52  | 3.12 | High |
| TCGA-50-5939 | 85 | MALE   | Yes     | Stage IB   | 20.03  | 14.92 | 8.25  | 8.04  | 3.13 | High |
| TCGA-50-5072 | 74 | MALE   | Yes     | Stage IIIA | 194.86 | 4.82  | 0.75  | 7.98  | 3.16 | High |
| TCGA-05-4418 | 69 | MALE   | Yes     | Stage IIIA | 214.46 | 4.89  | 1.41  | 4.56  | 3.24 | High |
| TCGA-78-7166 | 84 | MALE   | Yes     | Stage IIB  | 281.34 | 2.51  | 0.12  | 0.65  | 3.33 | High |
| TCGA-73-4670 | 69 | FEMALE | Yes     | Stage IV   | 250.71 | 3.79  | 1.16  | 2.04  | 3.34 | High |
| TCGA-64-5775 | 71 | MALE   | Yes     | Stage IIIA | 0.61   | 22.75 | 11.74 | 0.89  | 3.49 | High |
| TCGA-05-5429 | 60 | MALE   | No      | Stage IIIA | 11.08  | 0.95  | 6.75  | 32.22 | 3.60 | High |

|              |    |        |     |            |        |       |       |      |      |      |
|--------------|----|--------|-----|------------|--------|-------|-------|------|------|------|
| TCGA-55-7726 | 72 | FEMALE | Yes | Stage IA   | 22.70  | 26.81 | 13.16 | 3.68 | 4.43 | High |
| TCGA-05-4415 | 57 | MALE   | Yes | Stage IIIB | 217.57 | 37.45 | 2.95  | 6.18 | 5.79 | High |

**Supplemental Table 2:** Clinical characteristics, follow-up data, and four-gene prognostic signature data in TCGA Cohort II

| ID           | Age (y) | Gender | Smoking History |      | ENSG000001041 | ENSG000001565 | ENSG00000235884   | ENSG00000156869 | Four-gene Risk Score | Four-gene Risk Group |
|--------------|---------|--------|-----------------|------|---------------|---------------|-------------------|-----------------|----------------------|----------------------|
|              |         |        |                 |      | 40 (RHOV)     | 35 (CD109)    | 35884 (LINC00941) | 0156869 (FRRS1) |                      |                      |
| TCGA-55-A492 | 70      | FEMALE | Yes             | IA   | 3.36          | 0.41          | 0.01              | 0.16            | 0.08                 | Low                  |
| TCGA-MP-A5C7 | 76      | FEMALE | Yes             | IB   | 3.03          | 0.26          | 0.04              | 0.35            | 0.08                 | Low                  |
| TCGA-95-A4VP | 66      | FEMALE | Yes             | IIIA | 3.06          | 0.67          | 0.09              | 0.15            | 0.10                 | Low                  |
| TCGA-55-8097 | 60      | FEMALE | Yes             | IA   | 0.38          | 0.71          | 0.07              | 0.63            | 0.11                 | Low                  |
| TCGA-78-7155 | 68      | MALE   | Yes             | IB   | 1.70          | 0.83          | 0.11              | 0.33            | 0.12                 | Low                  |
| TCGA-86-8669 | 64      | MALE   | Yes             | IA   | 2.14          | 0.66          | 0.12              | 0.49            | 0.12                 | Low                  |
| TCGA-91-A4BC | 59      | MALE   | Yes             | IIA  | 1.09          | 0.55          | 0.24              | 0.51            | 0.13                 | Low                  |
| TCGA-MP-A4TH | 70      | FEMALE | Yes             | IA   | 3.49          | 0.56          | 0.04              | 0.61            | 0.13                 | Low                  |
| TCGA-91-8497 | 75      | FEMALE | No              | IA   | 0.90          | 1.08          | 0.05              | 0.54            | 0.13                 | Low                  |
| TCGA-50-5051 | 42      | FEMALE | Yes             | IIIA | 5.97          | 0.47          | 0.04              | 0.37            | 0.13                 | Low                  |
| TCGA-62-8397 | 70      | FEMALE | No              | IIB  | 0.79          | 0.59          | 0.09              | 1.00            | 0.13                 | Low                  |
| TCGA-49-AAR0 | 57      | MALE   | Yes             | IA   | 6.27          | 0.54          | 0.04              | 0.37            | 0.14                 | Low                  |
| TCGA-97-A4M0 | 60      | FEMALE | Yes             | IB   | 3.49          | 0.59          | 0.02              | 0.79            | 0.14                 | Low                  |
| TCGA-L9-A7SV | 69      | MALE   | Yes             | IIA  | 0.60          | 0.98          | 0.03              | 0.90            | 0.14                 | Low                  |
| TCGA-J2-A4AG | 66      | FEMALE | Yes             | IA   | 0.99          | 0.95          | 0.03              | 0.85            | 0.14                 | Low                  |
| TCGA-J2-A4AE | 77      | FEMALE | No              | IA   | 2.63          | 0.69          | 0.01              | 0.97            | 0.15                 | Low                  |
| TCGA-97-A4M1 | 52      | FEMALE | Yes             | IA   | 1.20          | 1.18          | 0.03              | 0.71            | 0.15                 | Low                  |
| TCGA-55-8087 | 59      | FEMALE | No              | IB   | 4.50          | 0.82          | 0.01              | 0.60            | 0.15                 | Low                  |
| TCGA-86-A4D0 | 48      | MALE   | Yes             | IIA  | 2.03          | 1.49          | 0.03              | 0.33            | 0.15                 | Low                  |
| TCGA-97-8172 | 75      | FEMALE | Yes             | IB   | 1.77          | 1.11          | 0.04              | 0.73            | 0.15                 | Low                  |
| TCGA-L9-A50W | 75      | MALE   | Yes             | IIA  | 6.56          | 0.59          | 0.04              | 0.48            | 0.15                 | Low                  |
| TCGA-50-8460 | 74      | MALE   | Unknown         | IA   | 1.13          | 0.68          | 0.13              | 1.03            | 0.15                 | Low                  |
| TCGA-62-8395 | 80      | FEMALE | No              | IIB  | 2.13          | 0.99          | 0.09              | 0.86            | 0.17                 | Low                  |
| TCGA-62-8399 | 62      | MALE   | Yes             | IIIA | 3.27          | 1.17          | 0.07              | 0.57            | 0.17                 | Low                  |
| TCGA-44-A47B | 79      | MALE   | Yes             | IB   | 3.94          | 1.37          | 0.02              | 0.41            | 0.17                 | Low                  |
| TCGA-97-A4M3 | 69      | FEMALE | Yes             | IA   | 9.29          | 0.66          | 0.00              | 0.37            | 0.17                 | Low                  |
| TCGA-50-7109 | 60      | MALE   | Yes             | IA   | 4.49          | 1.16          | 0.09              | 0.45            | 0.17                 | Low                  |
| TCGA-49-AARQ | 41      | FEMALE | Yes             | I    | 10.46         | 0.33          | 0.10              | 0.35            | 0.18                 | Low                  |
| TCGA-50-8457 | 63      | FEMALE | Yes             | IA   | 1.07          | 1.44          | 0.04              | 0.91            | 0.18                 | Low                  |
| TCGA-97-8552 | 55      | FEMALE | No              | I    | 7.61          | 0.82          | 0.05              | 0.51            | 0.18                 | Low                  |
| TCGA-78-7161 | 69      | FEMALE | Yes             | IIB  | 4.31          | 0.59          | 0.48              | 0.26            | 0.18                 | Low                  |
| TCGA-86-A456 | 78      | FEMALE | Yes             | IA   | 1.41          | 1.86          | 0.02              | 0.59            | 0.18                 | Low                  |
| TCGA-91-A4BD | 78      | MALE   | Yes             | IIA  | 11.52         | 0.68          | 0.00              | 0.18            | 0.18                 | Low                  |
| TCGA-49-4512 | 69      | FEMALE | No              | IIIA | 5.22          | 1.28          | 0.12              | 0.40            | 0.19                 | Low                  |
| TCGA-86-8668 | 61      | FEMALE | No              | IA   | 0.81          | 1.38          | 0.00              | 1.27            | 0.19                 | Low                  |
| TCGA-55-A48X | 63      | FEMALE | Yes             | IIA  | 5.20          | 0.89          | 0.07              | 0.95            | 0.20                 | Low                  |
| TCGA-97-A4M7 | 74      | MALE   | Yes             | IA   | 5.90          | 0.95          | 0.02              | 0.92            | 0.20                 | Low                  |
| TCGA-97-8171 | 81      | MALE   | Yes             | IV   | 1.98          | 0.57          | 0.05              | 1.82            | 0.20                 | Low                  |
| TCGA-78-7158 | 59      | FEMALE | Yes             | IIIB | 3.05          | 0.74          | 0.02              | 1.61            | 0.20                 | Low                  |
| TCGA-69-8255 | 71      | MALE   | Yes             | IA   | 1.39          | 0.42          | 0.02              | 2.21            | 0.21                 | Low                  |
| TCGA-NJ-A4YG | 65      | MALE   | Yes             | IB   | 9.74          | 0.86          | 0.05              | 0.46            | 0.21                 | Low                  |
| TCGA-86-8671 | 72      | FEMALE | No              | IIB  | 2.08          | 1.82          | 0.07              | 0.73            | 0.21                 | Low                  |
| TCGA-86-8073 | 58      | MALE   | Yes             | IB   | 2.82          | 1.12          | 0.05              | 1.32            | 0.21                 | Low                  |
| TCGA-97-A4M2 | 66      | MALE   | Yes             | IA   | 4.96          | 1.60          | 0.04              | 0.58            | 0.21                 | Low                  |
| TCGA-91-8496 | 63      | FEMALE | No              | IB   | 0.82          | 1.56          | 0.00              | 1.45            | 0.22                 | Low                  |
| TCGA-97-8179 | 72      | MALE   | Yes             | IA   | 3.28          | 1.91          | 0.10              | 0.53            | 0.22                 | Low                  |
| TCGA-86-7954 | 68      | FEMALE | Yes             | IB   | 5.96          | 1.03          | 0.15              | 0.83            | 0.22                 | Low                  |
| TCGA-4B-A93V | 52      | FEMALE | Yes             | IA   | 13.93         | 0.13          | 0.22              | 0.28            | 0.22                 | Low                  |
| TCGA-62-8402 | 73      | FEMALE | No              | IIIA | 10.48         | 0.64          | 0.12              | 0.60            | 0.22                 | Low                  |
| TCGA-49-AAR2 | 64      | MALE   | Yes             | IB   | 12.77         | 0.37          | 0.08              | 0.64            | 0.22                 | Low                  |
| TCGA-93-7347 | 76      | FEMALE | Yes             | IA   | 2.16          | 1.76          | 0.11              | 0.92            | 0.22                 | Low                  |

|              |    |        |         |           |       |      |      |      |      |     |
|--------------|----|--------|---------|-----------|-------|------|------|------|------|-----|
| TCGA-44-A47A | 78 | FEMALE | Yes     | IB        | 4.63  | 1.01 | 0.01 | 1.48 | 0.23 | Low |
| TCGA-44-A479 | 73 | FEMALE | Yes     | IB        | 3.69  | 1.00 | 0.26 | 1.06 | 0.23 | Low |
| TCGA-97-A4LX | 81 | MALE   | Yes     | IB        | 3.48  | 1.65 | 0.12 | 0.88 | 0.23 | Low |
| TCGA-55-8092 | 75 | MALE   | Yes     | IIB       | 4.06  | 0.50 | 0.12 | 1.94 | 0.24 | Low |
| TCGA-97-A4M6 | 45 | FEMALE | No      | IA        | 13.87 | 0.73 | 0.04 | 0.42 | 0.24 | Low |
| TCGA-86-A4P8 | 59 | FEMALE | No      | IIIA      | 0.43  | 2.10 | 0.02 | 1.27 | 0.24 | Low |
| TCGA-J2-8194 | 69 | FEMALE | Yes     | IIB       | 2.29  | 2.36 | 0.12 | 0.54 | 0.24 | Low |
| TCGA-62-A46V | 78 | FEMALE | Yes     | IB        | 6.87  | 1.77 | 0.08 | 0.54 | 0.24 | Low |
| TCGA-NJ-A7XG | 49 | MALE   | Yes     | IIIA      | 12.14 | 1.10 | 0.05 | 0.53 | 0.25 | Low |
| TCGA-86-A4P7 | 63 | FEMALE | No      | IB        | 7.95  | 1.37 | 0.04 | 0.94 | 0.25 | Low |
| TCGA-55-A57B | 80 | FEMALE | No      | IA        | 1.74  | 1.16 | 0.06 | 2.09 | 0.26 | Low |
| TCGA-NJ-A55R | 67 | MALE   | Yes     | IA        | 2.35  | 2.75 | 0.18 | 0.37 | 0.26 | Low |
| TCGA-44-A4SU | 67 | FEMALE | Yes     | IA        | 7.76  | 1.65 | 0.05 | 0.87 | 0.26 | Low |
| TCGA-86-8673 | 61 | MALE   | Yes     | IB        | 10.34 | 1.46 | 0.05 | 0.66 | 0.26 | Low |
| TCGA-93-A4JN | 71 | MALE   | Yes     | IV        | 1.48  | 2.24 | 0.31 | 0.70 | 0.27 | Low |
| TCGA-L4-A4E5 | 48 | FEMALE | Yes     | I         | 9.77  | 1.63 | 0.03 | 0.65 | 0.27 | Low |
| TCGA-NJ-A55O | 56 | FEMALE | Yes     | IIA       | 5.91  | 2.01 | 0.04 | 0.93 | 0.27 | Low |
| TCGA-38-4628 | 65 | FEMALE | No      | IIB       | 4.92  | 1.53 | 0.02 | 1.65 | 0.28 | Low |
| TCGA-44-6778 | 59 | MALE   | Yes     | IA        | 0.61  | 1.96 | 0.03 | 2.12 | 0.29 | Low |
| TCGA-97-7554 | 83 | FEMALE | Yes     | IIIA      | 2.59  | 2.68 | 0.08 | 1.08 | 0.30 | Low |
| TCGA-55-A491 | 81 | FEMALE | Yes     | IA        | 8.06  | 1.32 | 0.08 | 1.50 | 0.30 | Low |
| TCGA-55-A4DG | 71 | MALE   | Yes     | IA        | 0.61  | 3.52 | 0.04 | 0.80 | 0.30 | Low |
| TCGA-MP-A4TE | 56 | MALE   | Yes     | IIA       | 16.96 | 1.49 | 0.08 | 0.11 | 0.31 | Low |
| TCGA-55-8203 | 69 | FEMALE | Yes     | IB        | 18.48 | 0.82 | 0.17 | 0.33 | 0.31 | Low |
| TCGA-97-A4M5 | 83 | MALE   | Yes     | IA        | 10.05 | 2.24 | 0.03 | 0.71 | 0.31 | Low |
| TCGA-55-8621 | 75 | FEMALE | Yes     | IA        | 4.62  | 2.34 | 0.11 | 1.29 | 0.32 | Low |
| TCGA-55-A4DF | 88 | MALE   | Yes     | IA        | 8.99  | 2.16 | 0.02 | 1.13 | 0.33 | Low |
| TCGA-55-A494 | 61 | FEMALE | Yes     | IB        | 9.82  | 1.34 | 0.76 | 0.20 | 0.33 | Low |
| TCGA-49-AARR | 68 | MALE   | Yes     | IA        | 12.85 | 1.64 | 0.04 | 1.09 | 0.34 | Low |
| TCGA-55-8510 | 55 | FEMALE | Yes     | IB        | 4.25  | 3.17 | 0.05 | 1.09 | 0.34 | Low |
| TCGA-95-7562 | 71 | MALE   | Yes     | IIA       | 17.17 | 1.44 | 0.02 | 0.84 | 0.35 | Low |
| TCGA-99-AA5R | 70 | FEMALE | Yes     | IA        | 3.87  | 3.54 | 0.04 | 0.92 | 0.35 | Low |
| TCGA-86-8358 | 44 | MALE   | Yes     | IB        | 1.28  | 2.84 | 0.06 | 1.96 | 0.35 | Low |
| TCGA-L4-A4E6 | 67 | MALE   | Yes     | IA        | 0.93  | 3.26 | 0.17 | 1.43 | 0.36 | Low |
| TCGA-62-A472 | 70 | MALE   | Yes     | IIB       | 10.06 | 2.60 | 0.28 | 0.52 | 0.37 | Low |
| TCGA-91-6835 | 81 | FEMALE | Yes     | IA        | 2.04  | 3.29 | 0.02 | 1.75 | 0.37 | Low |
| TCGA-MN-A4N1 | 60 | MALE   | Yes     | IIA       | 4.03  | 3.73 | 0.34 | 0.36 | 0.37 | Low |
| TCGA-62-A46U | 71 | FEMALE | No      | IIB       | 12.67 | 1.91 | 0.07 | 1.38 | 0.38 | Low |
| TCGA-55-A48Y | 69 | MALE   | Yes     | IIA       | 13.80 | 1.70 | 0.25 | 1.00 | 0.38 | Low |
| TCGA-91-8499 | 76 | FEMALE | Yes     | IA        | 1.82  | 2.36 | 0.07 | 2.64 | 0.38 | Low |
| TCGA-S2-AA1A | 68 | FEMALE | Yes     | IA        | 4.37  | 0.52 | 1.39 | 0.97 | 0.38 | Low |
| TCGA-86-6851 | 73 | FEMALE | Yes     | IIA       | 0.73  | 3.63 | 0.11 | 1.62 | 0.38 | Low |
| TCGA-49-4490 | 45 | FEMALE | Yes     | IIIA      | 5.79  | 2.29 | 0.06 | 2.29 | 0.39 | Low |
| TCGA-50-5045 | 57 | FEMALE | Unknown | IA        | 6.29  | 3.18 | 0.33 | 0.83 | 0.39 | Low |
| TCGA-95-A4VN | 62 | FEMALE | Yes     | IIA       | 10.67 | 3.51 | 0.05 | 0.73 | 0.41 | Low |
| TCGA-55-8208 | 73 | FEMALE | Yes     | IA        | 9.99  | 3.04 | 0.10 | 1.22 | 0.41 | Low |
| TCGA-67-6215 | 52 | FEMALE | No      | IB        | 19.90 | 1.04 | 0.05 | 1.69 | 0.42 | Low |
| TCGA-49-4487 | 72 | FEMALE | Yes     | IA        | 24.67 | 1.24 | 0.23 | 0.48 | 0.42 | Low |
| TCGA-55-A48Z | 60 | FEMALE | Yes     | IIIB      | 9.97  | 4.22 | 0.07 | 0.81 | 0.46 | Low |
| TCGA-44-3917 | 33 | FEMALE | Yes     | IB        | 1.46  | 1.71 | 0.18 | 4.18 | 0.46 | Low |
| TCGA-95-7043 | 63 | FEMALE | Yes     | IA        | 28.13 | 1.43 | 0.02 | 0.74 | 0.46 | Low |
| TCGA-95-8039 | 72 | MALE   | No      | IA        | 14.34 | 4.01 | 0.05 | 0.51 | 0.47 | Low |
| TCGA-78-8640 | 59 | MALE   | Yes     | IIA       | 12.63 | 0.74 | 0.03 | 3.88 | 0.47 | Low |
| TCGA-49-AARO | 39 | FEMALE | Yes     | IA        | 11.02 | 4.17 | 0.35 | 0.53 | 0.49 | Low |
| TCGA-55-6987 | 77 | MALE   | Yes     | IA        | 18.26 | 3.05 | 0.13 | 1.08 | 0.50 | Low |
| TCGA-69-8254 | 85 | MALE   | Yes     | Available | 10.32 | 4.20 | 0.02 | 1.50 | 0.50 | Low |
| TCGA-93-A4JP | 64 | MALE   | No      | IV        | 6.73  | 5.40 | 0.01 | 1.02 | 0.50 | Low |
| TCGA-86-A4JF | 56 | MALE   | Yes     | IIB       | 36.46 | 0.77 | 0.04 | 0.79 | 0.52 | Low |
| TCGA-MN-A4N4 | 57 | MALE   | Yes     | IA        | 15.96 | 4.35 | 0.17 | 0.42 | 0.52 | Low |

|              |    |        |         |      |        |       |      |      |      |      |
|--------------|----|--------|---------|------|--------|-------|------|------|------|------|
| TCGA-97-8547 | 78 | FEMALE | No      | IIIA | 19.42  | 3.85  | 0.14 | 0.49 | 0.53 | Low  |
| TCGA-93-A4JQ | 49 | MALE   | Yes     | IA   | 7.80   | 4.61  | 0.34 | 1.35 | 0.54 | Low  |
| TCGA-NJ-A4YF | 50 | FEMALE | Yes     | IA   | 44.86  | 0.67  | 0.00 | 0.17 | 0.55 | Low  |
| TCGA-86-8056 | 63 | FEMALE | Yes     | IIIA | 0.78   | 5.41  | 0.08 | 2.44 | 0.55 | Low  |
| TCGA-44-A47G | 73 | FEMALE | Yes     | IA   | 3.38   | 7.21  | 0.07 | 0.63 | 0.57 | Low  |
| TCGA-05-4427 | 65 | FEMALE | Yes     | IIB  | 5.27   | 6.94  | 0.18 | 0.92 | 0.61 | Low  |
| TCGA-L9-A743 | 56 | MALE   | Yes     | IIA  | 11.90  | 6.29  | 0.15 | 0.70 | 0.62 | Low  |
| TCGA-J2-A4AD | 61 | FEMALE | Yes     | IA   | 13.43  | 5.35  | 0.04 | 1.78 | 0.64 | Low  |
| TCGA-50-5931 | 75 | FEMALE | Yes     | IB   | 14.47  | 5.15  | 0.18 | 1.53 | 0.64 | Low  |
| TCGA-44-A4SS | 73 | MALE   | Yes     | IA   | 9.84   | 1.99  | 0.60 | 4.34 | 0.65 | Low  |
| TCGA-97-8176 | 63 | MALE   | Yes     | IIIA | 43.36  | 1.33  | 0.04 | 1.21 | 0.66 | Low  |
| TCGA-95-7039 | 54 | FEMALE | Yes     | IIB  | 9.67   | 7.95  | 0.00 | 0.39 | 0.66 | Low  |
| TCGA-86-8672 | 59 | MALE   | No      | IIB  | 28.18  | 1.09  | 1.23 | 1.41 | 0.68 | Low  |
| TCGA-L9-A8F4 | 64 | FEMALE | Yes     | IB   | 52.08  | 1.26  | 0.04 | 0.58 | 0.70 | Low  |
| TCGA-95-8494 | 67 | MALE   | Yes     | IIA  | 15.05  | 7.18  | 0.04 | 0.99 | 0.72 | Low  |
| TCGA-99-7458 | 74 | FEMALE | Yes     | IIIA | 4.01   | 8.52  | 0.01 | 2.10 | 0.76 | Low  |
| TCGA-J2-8192 | 65 | FEMALE | No      | IIA  | 18.16  | 5.74  | 0.20 | 2.12 | 0.76 | Low  |
| TCGA-73-4666 | 52 | FEMALE | Yes     | IV   | 10.27  | 5.88  | 0.93 | 2.38 | 0.82 | Low  |
| TCGA-86-8359 | 52 | MALE   | Yes     | IIIA | 55.82  | 2.26  | 0.28 | 0.57 | 0.85 | Low  |
| TCGA-49-4494 | 77 | MALE   | Yes     | IIIA | 38.14  | 2.65  | 1.13 | 1.10 | 0.86 | Low  |
| TCGA-95-7944 | 71 | MALE   | Yes     | IA   | 5.72   | 2.95  | 3.31 | 0.88 | 0.86 | Low  |
| TCGA-MP-A4T9 | 54 | FEMALE | Yes     | IIIA | 10.83  | 10.30 | 0.12 | 0.81 | 0.88 | Low  |
| TCGA-50-5933 | 72 | MALE   | Unknown | IIB  | 3.38   | 11.31 | 0.07 | 2.02 | 0.94 | Low  |
| TCGA-44-2662 | 65 | MALE   | Yes     | IB   | 0.44   | 8.55  | 0.63 | 3.84 | 0.95 | Low  |
| TCGA-55-8614 | 76 | MALE   | Yes     | IB   | 24.01  | 5.54  | 1.20 | 2.30 | 0.99 | High |
| TCGA-05-4398 | 47 | FEMALE | Yes     | IIIB | 30.24  | 9.03  | 0.07 | 0.74 | 0.99 | High |
| TCGA-69-8453 | 77 | MALE   | Yes     | IIB  | 5.52   | 7.33  | 2.27 | 1.13 | 1.00 | High |
| TCGA-95-A4VK | 74 | FEMALE | Yes     | IIIA | 82.59  | 1.83  | 0.11 | 0.91 | 1.11 | High |
| TCGA-86-8055 | 79 | MALE   | Yes     | IIA  | 3.58   | 12.72 | 0.25 | 3.43 | 1.17 | High |
| TCGA-NJ-A4YP | 52 | MALE   | Yes     | IB   | 85.08  | 2.18  | 0.13 | 1.05 | 1.18 | High |
| TCGA-73-A9RS | 41 | MALE   | Yes     | IIB  | 87.41  | 0.77  | 0.05 | 2.17 | 1.18 | High |
| TCGA-MP-A4TK | 56 | FEMALE | Yes     | IIB  | 3.37   | 14.52 | 1.08 | 0.56 | 1.21 | High |
| TCGA-MN-A4N5 | 63 | MALE   | Yes     | IA   | 64.24  | 4.54  | 0.98 | 0.65 | 1.21 | High |
| TCGA-86-8674 | 50 | MALE   | Yes     | IIA  | 105.23 | 0.18  | 0.07 | 1.32 | 1.28 | High |
| TCGA-49-AAR3 | 69 | MALE   | Unknown | IIB  | 2.37   | 8.52  | 3.89 | 0.78 | 1.28 | High |
| TCGA-86-8278 | 63 | FEMALE | No      | IIB  | 82.28  | 4.37  | 0.44 | 1.23 | 1.35 | High |
| TCGA-50-5930 | 47 | MALE   | Unknown | IIIA | 74.34  | 5.88  | 0.20 | 1.74 | 1.36 | High |
| TCGA-44-3398 | 77 | FEMALE | Yes     | IA   | 36.65  | 10.58 | 1.16 | 2.64 | 1.48 | High |
| TCGA-38-4629 | 68 | MALE   | Yes     | IIB  | 8.01   | 12.03 | 2.61 | 2.99 | 1.52 | High |
| TCGA-NJ-A4YQ | 69 | FEMALE | Yes     | IA   | 82.52  | 7.91  | 0.02 | 2.39 | 1.61 | High |
| TCGA-78-7146 | 71 | FEMALE | Yes     | IIIA | 15.99  | 17.22 | 1.72 | 1.79 | 1.72 | High |
| TCGA-78-7154 | 72 | MALE   | Yes     | IIIA | 3.16   | 11.50 | 4.81 | 7.03 | 2.08 | High |
| TCGA-55-8299 | 61 | FEMALE | Yes     | IA   | 165.71 | 2.77  | 0.16 | 2.21 | 2.19 | High |
| TCGA-78-7542 | 56 | MALE   | Yes     | IB   | 15.49  | 24.15 | 3.64 | 2.68 | 2.55 | High |
| TCGA-44-7661 | 69 | FEMALE | Yes     | IB   | 13.62  | 17.20 | 7.03 | 1.81 | 2.56 | High |
| TCGA-78-7150 | 59 | MALE   | Yes     | IIB  | 173.64 | 5.31  | 0.40 | 4.90 | 2.68 | High |
| TCGA-49-4506 | 68 | FEMALE | Yes     | IIB  | 328.54 | 0.92  | 3.93 | 2.01 | 4.46 | High |

**Supplemental Table 3:** Clinical characteristics, follow-up data, and four-gene prognostic signature data in the MCTP CoI

| ID   | Age (y) | Gender |     | ENSG00  | ENSG00  | ENSG0000   | ENSG0000 | Four- | Four-gene Risk |
|------|---------|--------|-----|---------|---------|------------|----------|-------|----------------|
|      |         |        |     | 0001041 | 0001565 | 0235884    |          |       |                |
|      |         |        |     | 40      | 35      | (LINC00941 | (FRRS1)  | Score | Group          |
|      |         |        |     | (RHOV)  | (CD109) | )          |          |       |                |
| A67  | 62      | FEMALE | I   | 0.74    | 0.21    | 0.02       | 0.11     | 0.03  | Low            |
| A49  | 65      | MALE   | I   | 2.76    | 0.13    | 0.03       | 0.30     | 0.06  | Low            |
| A07  | 65      | FEMALE | I   | 4.13    | 0.14    | 0.00       | 0.34     | 0.08  | Low            |
| C052 | 68      | FEMALE | I   | 0.09    | 0.66    | 0.03       | 0.65     | 0.10  | Low            |
| C004 | 72      | MALE   | III | 0.92    | 0.25    | 0.18       | 0.62     | 0.10  | Low            |
| C084 | 55      | FEMALE | II  | 1.07    | 0.54    | 0.18       | 0.52     | 0.11  | Low            |
| C016 | 80      | FEMALE | I   | 3.57    | 0.42    | 0.14       | 0.54     | 0.13  | Low            |
| A75  | 85      | FEMALE | I   | 4.38    | 0.48    | 0.12       | 0.44     | 0.13  | Low            |
| C056 | 69      | FEMALE | I   | 0.41    | 0.89    | 0.02       | 0.94     | 0.13  | Low            |
| C026 | 77      | MALE   | I   | 1.93    | 0.71    | 0.26       | 0.51     | 0.15  | Low            |
| A65  | 69      | MALE   | III | 4.98    | 0.64    | 0.05       | 0.72     | 0.16  | Low            |
| C051 | 64      | MALE   | I   | 0.71    | 1.09    | 0.21       | 0.75     | 0.17  | Low            |
| A34  | 78      | FEMALE | III | 4.27    | 0.59    | 0.29       | 0.50     | 0.17  | Low            |
| C045 | 79      | FEMALE | I   | 2.10    | 0.76    | 0.16       | 1.03     | 0.17  | Low            |
| C030 | 60      | MALE   | I   | 10.50   | 0.38    | 0.08       | 0.27     | 0.17  | Low            |
| C062 | 60      | FEMALE | III | 0.30    | 1.24    | 0.28       | 0.65     | 0.18  | Low            |
| L63  | 39      | FEMALE | III | 4.02    | 1.00    | 0.22       | 0.57     | 0.19  | Low            |
| C041 | 81      | MALE   | I   | 0.52    | 0.50    | 0.14       | 1.76     | 0.19  | Low            |
| C002 | 72      | MALE   | I   | 1.22    | 1.47    | 0.14       | 0.79     | 0.19  | Low            |
| C111 | 77      | FEMALE | II  | 2.06    | 1.10    | 0.18       | 1.11     | 0.20  | Low            |
| C042 | 78      | MALE   | I   | 10.70   | 0.23    | 0.07       | 0.88     | 0.21  | Low            |
| C116 | 59      | FEMALE | I   | 3.84    | 1.29    | 0.01       | 1.08     | 0.21  | Low            |
| C038 | 62      | FEMALE | II  | 1.31    | 1.13    | 0.38       | 0.80     | 0.21  | Low            |
| C017 | 76      | MALE   | II  | 0.94    | 0.92    | 0.00       | 2.04     | 0.22  | Low            |
| C023 | 78      | MALE   | I   | 0.09    | 1.32    | 0.30       | 1.16     | 0.22  | Low            |
| C089 | 75      | MALE   | I   | 2.65    | 1.94    | 0.26       | 0.35     | 0.23  | Low            |
| C046 | 73      | FEMALE | I   | 12.69   | 0.22    | 0.17       | 0.78     | 0.24  | Low            |
| C040 | 71      | FEMALE | I   | 5.41    | 1.22    | 0.40       | 0.65     | 0.25  | Low            |
| C028 | 76      | MALE   | I   | 2.52    | 2.26    | 0.19       | 0.93     | 0.27  | Low            |
| A63  | 40      | FEMALE | I   | 5.04    | 1.13    | 0.54       | 0.83     | 0.28  | Low            |
| A41  | 63      | FEMALE | I   | 6.38    | 2.86    | 0.14       | 0.41     | 0.31  | Low            |
| C037 | 73      | MALE   | I   | 3.73    | 3.82    | 0.11       | 0.86     | 0.37  | Low            |
| C031 | 85      | FEMALE | II  | 3.67    | 2.34    | 0.42       | 1.54     | 0.37  | Low            |
| A85  | 68      | MALE   | II  | 13.14   | 1.69    | 0.06       | 1.57     | 0.38  | Low            |
| C011 | 73      | MALE   | I   | 12.46   | 1.38    | 0.56       | 1.28     | 0.41  | Low            |
| C055 | 63      | FEMALE | III | 18.63   | 0.94    | 0.31       | 1.53     | 0.43  | Low            |
| A17  | 61      | FEMALE | I   | 9.53    | 3.00    | 0.05       | 1.70     | 0.43  | Low            |
| C117 | 83      | MALE   | I   | 12.08   | 1.75    | 0.82       | 0.80     | 0.44  | Low            |
| A29  | 74      | FEMALE | III | 30.89   | 0.58    | 0.15       | 0.94     | 0.47  | Low            |
| C071 | 63      | FEMALE | I   | 4.50    | 2.19    | 1.24       | 1.09     | 0.47  | Low            |
| C103 | 71      | FEMALE | II  | 23.44   | 1.70    | 0.38       | 0.66     | 0.48  | Low            |
| A28  | 63      | MALE   | III | 2.78    | 3.74    | 0.34       | 2.33     | 0.50  | Low            |
| C115 | 52      | MALE   | I   | 3.34    | 4.33    | 0.87       | 0.55     | 0.50  | Low            |
| A52  | 72      | MALE   | I   | 2.65    | 3.17    | 1.36       | 0.67     | 0.51  | Low            |
| A39  | 73      | MALE   | I   | 1.54    | 0.96    | 1.87       | 1.98     | 0.53  | Low            |
| C059 | 74      | FEMALE | II  | 5.13    | 4.14    | 0.52       | 1.67     | 0.53  | Low            |
| A47  | 62      | MALE   | III | 3.81    | 6.61    | 0.32       | 0.39     | 0.56  | Low            |
| D1   | 31      | FEMALE | I   | 45.10   | 0.22    | 0.11       | 0.59     | 0.57  | Low            |
| A76  | 60      | FEMALE | II  | 25.59   | 1.69    | 0.12       | 2.21     | 0.57  | Low            |
| C020 | 73      | MALE   | I   | 0.79    | 5.07    | 0.24       | 2.86     | 0.59  | Low            |
| A70  | 77      | MALE   | III | 6.04    | 6.52    | 0.16       | 1.49     | 0.63  | Low            |

|      |    |        |     |        |       |       |      |      |      |
|------|----|--------|-----|--------|-------|-------|------|------|------|
| A25  | 72 | FEMALE | III | 45.12  | 0.65  | 0.48  | 0.70 | 0.67 | Low  |
| A35  | 81 | MALE   | I   | 5.50   | 1.61  | 1.24  | 4.20 | 0.67 | Low  |
| C033 | 85 | MALE   | I   | 4.10   | 3.38  | 2.33  | 1.48 | 0.75 | Low  |
| A93  | 54 | MALE   | II  | 57.72  | 1.23  | 0.12  | 2.01 | 0.88 | Low  |
| C074 | 58 | FEMALE | II  | 46.52  | 3.48  | 0.92  | 1.04 | 0.97 | Low  |
| A21  | 60 | FEMALE | I   | 90.94  | 0.35  | 0.08  | 0.41 | 1.07 | High |
| C083 | 48 | FEMALE | I   | 5.88   | 6.59  | 2.96  | 1.48 | 1.09 | High |
| A06  | 59 | FEMALE | I   | 2.99   | 2.32  | 4.72  | 3.28 | 1.19 | High |
| A61  | 48 | FEMALE | I   | 3.03   | 15.45 | 0.14  | 1.86 | 1.21 | High |
| C010 | 76 | MALE   | III | 80.08  | 3.40  | 1.08  | 2.51 | 1.46 | High |
| A19  | 48 | FEMALE | I   | 37.23  | 9.80  | 1.35  | 3.39 | 1.52 | High |
| C081 | 64 | MALE   | II  | 61.21  | 6.45  | 3.15  | 2.57 | 1.80 | High |
| C085 | 56 | MALE   | II  | 26.30  | 6.65  | 6.68  | 0.98 | 1.89 | High |
| C057 | 73 | MALE   | III | 165.07 | 0.98  | 0.23  | 2.85 | 2.12 | High |
| C058 | 52 | FEMALE | I   | 3.63   | 17.91 | 6.45  | 0.94 | 2.34 | High |
| C047 | 80 | FEMALE | III | 18.34  | 3.74  | 12.80 | 3.91 | 2.82 | High |



port

**Supplemental Table 4:** Individual gene univariate Cox proportional hazards models in TCGA Cohort I for genes with FDR  $\leq 0.05$ 

The top 13 genes that were used in stepwise regression are highlighted.

| <b>p-value</b> | <b>FDR</b> | <b>Hazard Ratio</b> | <b>Ensembl ID</b> | <b>Gene Symbol</b> | <b>Gene Type</b> |
|----------------|------------|---------------------|-------------------|--------------------|------------------|
| < 1e-07        | < 1e-07    | 1.012               | ENSG00000104140   | RHOV               | protein_coding   |
| < 1e-07        | < 1e-07    | 1.001               | ENSG00000134333   | LDHA               | protein_coding   |
| < 1e-07        | < 1e-07    | 1.106               | ENSG00000156535   | CD109              | protein_coding   |
| < 1e-07        | < 1e-07    | 1.331               | ENSG00000189362   | TMEM194B           | protein_coding   |
| < 1e-07        | 0.000213   | 1.32                | ENSG00000121621   | KIF18A             | protein_coding   |
| < 1e-07        | 0.000213   | 1.123               | ENSG00000088386   | SLC15A1            | protein_coding   |
| < 1e-07        | 0.000213   | 1.255               | ENSG00000235884   | Linc00941 (RP11-   | lincRNA          |
| 2E-07          | 0.000373   | 1.007               | ENSG00000117394   | SLC2A1             | protein_coding   |
| 3E-07          | 0.000448   | 1.012               | ENSG00000107984   | DKK1               | protein_coding   |
| 3E-07          | 0.000448   | 1.017               | ENSG00000139725   | RHOF               | protein_coding   |
| 4E-07          | 0.000543   | 1.154               | ENSG00000156687   | UNC5D              | protein_coding   |
| 5E-07          | 0.000622   | 1.047               | ENSG00000163814   | CDCP1              | protein_coding   |
| 6E-07          | 0.000689   | 1.115               | ENSG00000156869   | FRRS1              | protein_coding   |
| 1.2E-06        | 0.00112    | 1.086               | ENSG00000152056   | AP1S3              | protein_coding   |
| 1.2E-06        | 0.00112    | 1.02                | ENSG00000198517   | MAFK               | protein_coding   |
| 1.2E-06        | 0.00112    | 1.013               | ENSG00000137767   | SQRDL              | protein_coding   |
| 1.5E-06        | 0.00132    | 1.122               | ENSG00000196850   | PPTC7              | protein_coding   |
| 1.7E-06        | 0.00136    | 1.116               | ENSG00000159217   | IGF2BP1            | protein_coding   |
| 1.8E-06        | 0.00136    | 1.003               | ENSG00000150093   | ITGB1              | protein_coding   |
| 0.000002       | 0.00136    | 1.051               | ENSG00000188735   | TMEM120B           | protein_coding   |
| 0.000002       | 0.00136    | 1.011               | ENSG00000163735   | CXCL5              | protein_coding   |
| 2.1E-06        | 0.00136    | 1.197               | ENSG00000229656   | RP11-462L8.1       | lincRNA          |
| 2.1E-06        | 0.00136    | 1.019               | ENSG00000131746   | TNS4               | protein_coding   |
| 2.3E-06        | 0.00143    | 1.007               | ENSG00000197930   | ERO1L              | protein_coding   |
| 2.8E-06        | 0.00165    | 1.068               | ENSG00000091436   | AC013461.1         | protein_coding   |
| 0.000003       | 0.00165    | 1.031               | ENSG00000011426   | ANLN               | protein_coding   |
| 0.000003       | 0.00165    | 1.007               | ENSG00000075618   | FSCN1              | protein_coding   |
| 3.1E-06        | 0.00165    | 1.054               | ENSG00000147408   | CSGALNACT1         | protein_coding   |
| 3.4E-06        | 0.00175    | 1.019               | ENSG00000100558   | PLEK2              | protein_coding   |
| 3.6E-06        | 0.00178    | 1.042               | ENSG00000029153   | ARNTL2             | protein_coding   |

|          |         |       |                 |              |                |
|----------|---------|-------|-----------------|--------------|----------------|
| 3.7E-06  | 0.00178 | 1.051 | ENSG00000198752 | CDC42BPB     | protein_coding |
| 3.9E-06  | 0.00182 | 1.167 | ENSG00000112186 | CAP2         | protein_coding |
| 4.8E-06  | 0.00217 | 1.168 | ENSG00000116641 | DOCK7        | protein_coding |
| 5.7E-06  | 0.0025  | 1.131 | ENSG00000151572 | ANO4         | protein_coding |
| 5.9E-06  | 0.00252 | 1     | ENSG00000111640 | GAPDH        | protein_coding |
| 6.4E-06  | 0.00262 | 1.162 | ENSG00000179241 | LDLRAD3      | protein_coding |
| 6.5E-06  | 0.00262 | 1.039 | ENSG00000125733 | TRIP10       | protein_coding |
| 7.5E-06  | 0.00295 | 1.067 | ENSG00000163364 | AC017048.3   | lincRNA        |
| 8.3E-06  | 0.00318 | 1.127 | ENSG00000166206 | GABRB3       | protein_coding |
| 1.02E-05 | 0.00381 | 1.022 | ENSG00000143641 | GALNT2       | protein_coding |
| 1.07E-05 | 0.0039  | 1.017 | ENSG00000176014 | TUBB6        | protein_coding |
| 1.27E-05 | 0.00452 | 1.039 | ENSG00000153234 | NR4A2        | protein_coding |
| 1.31E-05 | 0.00455 | 1.178 | ENSG00000099139 | PCSK5        | protein_coding |
| 1.39E-05 | 0.00472 | 1.157 | ENSG00000157111 | TMEM171      | protein_coding |
| 1.43E-05 | 0.00475 | 1.029 | ENSG00000019549 | SNAI2        | protein_coding |
| 1.69E-05 | 0.00549 | 1.061 | ENSG00000132429 | POPDC3       | protein_coding |
| 1.74E-05 | 0.00551 | 1.114 | ENSG00000113249 | HAVCR1       | protein_coding |
| 1.77E-05 | 0.00551 | 1.035 | ENSG00000224407 | RP5-956O18.3 | antisense      |
| 1.83E-05 | 0.00558 | 1.005 | ENSG00000115919 | KYNU         | protein_coding |
| 1.99E-05 | 0.00595 | 1.053 | ENSG00000213281 | NRAS         | protein_coding |
| 2.41E-05 | 0.00688 | 1.021 | ENSG00000100522 | GNPNAT1      | protein_coding |
| 2.43E-05 | 0.00688 | 1.138 | ENSG00000147509 | RGS20        | protein_coding |
| 2.48E-05 | 0.00688 | 1.019 | ENSG00000178209 | PLEC         | protein_coding |
| 2.55E-05 | 0.00688 | 1.026 | ENSG00000163110 | PDLIM5       | protein_coding |
| 0.000026 | 0.00688 | 1.113 | ENSG00000221988 | PPT2         | protein_coding |
| 2.64E-05 | 0.00688 | 1.072 | ENSG00000102743 | SLC25A15     | protein_coding |
| 2.64E-05 | 0.00688 | 1.084 | ENSG00000127666 | TICAM1       | protein_coding |
| 2.67E-05 | 0.00688 | 1.04  | ENSG00000152377 | SPOCK1       | protein_coding |
| 2.82E-05 | 0.00714 | 1.021 | ENSG00000163975 | MFI2         | protein_coding |
| 2.96E-05 | 0.00737 | 1.134 | ENSG00000095752 | IL11         | protein_coding |
| 3.07E-05 | 0.00752 | 1.004 | ENSG00000141526 | SLC16A3      | protein_coding |
| 3.34E-05 | 0.00805 | 1.303 | ENSG00000186073 | C15orf41     | protein_coding |
| 3.57E-05 | 0.00834 | 1.032 | ENSG00000155254 | MARVELD1     | protein_coding |
| 0.000036 | 0.00834 | 1.402 | ENSG00000165891 | E2F7         | protein_coding |
| 3.63E-05 | 0.00834 | 1.188 | ENSG00000237523 | RP11-40F6.2  | lincRNA        |
| 4.08E-05 | 0.00923 | 1.007 | ENSG00000106366 | SERPINE1     | protein_coding |

|          |         |         |                 |              |                |
|----------|---------|---------|-----------------|--------------|----------------|
| 4.17E-05 | 0.0093  | 1.057   | ENSG00000169174 | PCSK9        | protein_coding |
| 4.31E-05 | 0.00947 | 1.117   | ENSG00000121236 | TRIM6        | protein_coding |
| 4.41E-05 | 0.00955 | 1.037   | ENSG00000133466 | C1QTNF6      | protein_coding |
| 4.59E-05 | 0.0098  | 1.167   | ENSG00000173218 | VANGL1       | protein_coding |
| 4.81E-05 | 0.01    | 1.193   | ENSG00000151835 | SACS         | protein_coding |
| 0.000049 | 0.01    | 1.276   | ENSG00000196935 | SRGAP1       | protein_coding |
| 4.91E-05 | 0.01    | 1.013   | ENSG00000125753 | VASP         | protein_coding |
| 5.33E-05 | 0.0106  | 1.015   | ENSG00000091136 | LAMB1        | protein_coding |
| 5.36E-05 | 0.0106  | 1.073   | ENSG00000169299 | PGM2         | protein_coding |
| 5.41E-05 | 0.0106  | 1.442   | ENSG00000138685 | FGF2         | protein_coding |
| 5.65E-05 | 0.011   | 1.011   | ENSG00000142864 | SERBP1       | protein_coding |
| 5.84E-05 | 0.0112  | 1.035   | ENSG00000167601 | AXL          | protein_coding |
| 0.000059 | 0.0112  | 1.008   | ENSG00000165637 | VDAC2        | protein_coding |
| 0.000063 | 0.0117  | 1.09    | ENSG00000087053 | MTMR2        | protein_coding |
| 6.34E-05 | 0.0117  | 1.071   | ENSG00000165801 | ARHGEF40     | protein_coding |
| 6.54E-05 | 0.0119  | 1       | ENSG00000135480 | KRT7         | protein_coding |
| 7.04E-05 | 0.0127  | 1.005   | ENSG00000147689 | FAM83A       | protein_coding |
| 7.15E-05 | 0.0127  | 1.019   | ENSG00000089159 | PXN          | protein_coding |
| 7.34E-05 | 0.0129  | 1.032   | ENSG00000065882 | TBC1D1       | protein_coding |
| 7.42E-05 | 0.0129  | 1.057   | ENSG00000131459 | GFPT2        | protein_coding |
| 7.52E-05 | 0.0129  | 1.02    | ENSG00000170035 | UBE2E3       | protein_coding |
| 7.58E-05 | 0.0129  | 1.001   | ENSG00000067225 | PKM          | protein_coding |
| 8.26E-05 | 0.0139  | 1.007   | ENSG00000067057 | PFKP         | protein_coding |
| 8.61E-05 | 0.0143  | 1.054   | ENSG00000115365 | LANCL1       | protein_coding |
| 9.07E-05 | 0.0149  | 1.142   | ENSG00000157766 | ACAN         | protein_coding |
| 0.000092 | 0.0149  | 1.049   | ENSG00000205642 | VCX3B        | protein_coding |
| 9.33E-05 | 0.0149  | 1.071   | ENSG00000065613 | SLK          | protein_coding |
| 9.36E-05 | 0.0149  | 1.093   | ENSG00000093000 | NUP50        | protein_coding |
| 9.68E-05 | 0.0152  | 1.039   | ENSG00000150630 | VEGFC        | protein_coding |
| 9.96E-05 | 0.0155  | 1.102   | ENSG00000135074 | ADAM19       | protein_coding |
| 0.000103 | 0.0157  | 1.007   | ENSG00000232527 | RP11-14N7.2  | lincRNA        |
| 0.000103 | 0.0157  | 1.022   | ENSG00000175592 | FOSL1        | protein_coding |
| 0.00011  | 0.0166  | 388.099 | ENSG00000230176 | RP4-779E11.3 | antisense      |
| 0.000112 | 0.0166  | 1.008   | ENSG00000153048 | CARHSP1      | protein_coding |
| 0.000114 | 0.0166  | 1.025   | ENSG00000188910 | GJB3         | protein_coding |
| 0.000114 | 0.0166  | 1.052   | ENSG00000110841 | PPFIBP1      | protein_coding |

|          |        |       |                 |          |                |
|----------|--------|-------|-----------------|----------|----------------|
| 0.000115 | 0.0166 | 1.084 | ENSG00000140406 | MESDC1   | protein_coding |
| 0.000117 | 0.0168 | 1.018 | ENSG00000100504 | PYGL     | protein_coding |
| 0.000118 | 0.0168 | 1.348 | ENSG00000169509 | CRCT1    | protein_coding |
| 0.000121 | 0.0171 | 1.001 | ENSG00000111669 | TPI1     | protein_coding |
| 0.000124 | 0.0173 | 1.028 | ENSG00000121005 | CRISPLD1 | protein_coding |
| 0.000128 | 0.0175 | 1.007 | ENSG00000171314 | PGAM1    | protein_coding |
| 0.000128 | 0.0175 | 1.055 | ENSG00000134548 | C12orf39 | protein_coding |
| 0.000134 | 0.0183 | 1.111 | ENSG00000160208 | RRP1B    | protein_coding |
| 0.000137 | 0.0184 | 1.209 | ENSG00000134830 | GPR77    | protein_coding |
| 0.000139 | 0.0184 | 1.003 | ENSG00000137309 | HMGA1    | protein_coding |
| 0.000139 | 0.0184 | 1.109 | ENSG00000146054 | TRIM7    | protein_coding |
| 0.000145 | 0.0191 | 1.275 | ENSG00000164418 | GRIK2    | protein_coding |
| 0.000148 | 0.0192 | 1.023 | ENSG00000164251 | F2RL1    | protein_coding |
| 0.000159 | 0.0204 | 1.014 | ENSG00000167755 | KLK6     | protein_coding |
| 0.000161 | 0.0204 | 1.053 | ENSG00000120437 | ACAT2    | protein_coding |
| 0.000162 | 0.0204 | 1.049 | ENSG00000120254 | MTHFD1L  | protein_coding |
| 0.000163 | 0.0204 | 1.041 | ENSG00000137936 | BCAR3    | protein_coding |
| 0.000164 | 0.0204 | 1.256 | ENSG00000157680 | DGKI     | protein_coding |
| 0.000165 | 0.0204 | 1.17  | ENSG00000139734 | DIAPH3   | protein_coding |
| 0.000168 | 0.0206 | 1.122 | ENSG00000160193 | WDR4     | protein_coding |
| 0.000172 | 0.0208 | 1.028 | ENSG00000170485 | NPAS2    | protein_coding |
| 0.000172 | 0.0208 | 1.04  | ENSG00000100347 | SAMM50   | protein_coding |
| 0.000177 | 0.0208 | 1.039 | ENSG00000164466 | SFXN1    | protein_coding |
| 0.000177 | 0.0208 | 1.108 | ENSG00000018510 | AGPS     | protein_coding |
| 0.000179 | 0.0208 | 1.013 | ENSG00000213923 | CSNK1E   | protein_coding |
| 0.000179 | 0.0208 | 1.037 | ENSG00000112299 | VNN1     | protein_coding |
| 0.000181 | 0.0208 | 1.063 | ENSG00000104320 | NBN      | protein_coding |
| 0.000182 | 0.0208 | 1.03  | ENSG00000147394 | ZNF185   | protein_coding |
| 0.000182 | 0.0208 | 1.028 | ENSG00000035403 | VCL      | protein_coding |
| 0.000184 | 0.0208 | 1.085 | ENSG00000104142 | VPS18    | protein_coding |
| 0.000187 | 0.0208 | 1.078 | ENSG00000213694 | S1PR3    | protein_coding |
| 0.000187 | 0.0208 | 1.005 | ENSG00000134871 | COL4A2   | protein_coding |
| 0.000193 | 0.0213 | 1.108 | ENSG00000205809 | KLRC2    | protein_coding |
| 0.000197 | 0.0216 | 1.05  | ENSG00000197905 | TEAD4    | protein_coding |
| 0.000198 | 0.0216 | 1.02  | ENSG00000173744 | AGFG1    | protein_coding |
| 0.000201 | 0.0217 | 1.081 | ENSG00000196588 | MKL1     | protein_coding |

|          |        |       |                 |               |                |
|----------|--------|-------|-----------------|---------------|----------------|
| 0.00021  | 0.0225 | 1.059 | ENSG00000094916 | CBX5          | protein_coding |
| 0.000211 | 0.0225 | 1.045 | ENSG00000176597 | B3GNT5        | protein_coding |
| 0.000228 | 0.0241 | 1.012 | ENSG00000102172 | SMS           | protein_coding |
| 0.000229 | 0.0241 | 1.007 | ENSG00000009307 | CSDE1         | protein_coding |
| 0.000232 | 0.0242 | 1     | ENSG00000170421 | KRT8          | protein_coding |
| 0.000251 | 0.026  | 1.005 | ENSG00000157227 | MMP14         | protein_coding |
| 0.000256 | 0.0264 | 1.007 | ENSG00000100380 | ST13          | protein_coding |
| 0.00026  | 0.0266 | 1.009 | ENSG00000185567 | AHNAK2        | protein_coding |
| 0.000266 | 0.0271 | 1.095 | ENSG00000143476 | DTL           | protein_coding |
| 0.000273 | 0.0274 | 1.004 | ENSG00000100342 | APOL1         | protein_coding |
| 0.000274 | 0.0274 | 1.115 | ENSG00000089902 | RCOR1         | protein_coding |
| 0.00028  | 0.0279 | 1.02  | ENSG00000079739 | PGM1          | protein_coding |
| 0.000283 | 0.028  | 1.028 | ENSG00000138594 | TMOD3         | protein_coding |
| 0.000287 | 0.0282 | 1.134 | ENSG00000057704 | TMCC3         | protein_coding |
| 0.000292 | 0.0285 | 1.013 | ENSG00000105355 | PLIN3         | protein_coding |
| 0.000298 | 0.0288 | 1.402 | ENSG00000141096 | DPEP3         | protein_coding |
| 0.000299 | 0.0288 | 1.066 | ENSG00000076067 | RBMS2         | protein_coding |
| 0.000317 | 0.0304 | 1.146 | ENSG00000105137 | SYDE1         | protein_coding |
| 0.000333 | 0.0317 | 1.013 | ENSG00000079246 | XRCC5         | protein_coding |
| 0.000341 | 0.0321 | 1.009 | ENSG00000148344 | PTGES         | protein_coding |
| 0.000347 | 0.0321 | 1.124 | ENSG00000040275 | CCDC99        | protein_coding |
| 0.00035  | 0.0321 | 1.015 | ENSG00000091409 | ITGA6         | protein_coding |
| 0.000351 | 0.0321 | 1.006 | ENSG00000213585 | VDAC1         | protein_coding |
| 0.000353 | 0.0321 | 1.176 | ENSG00000175874 | CREG2         | protein_coding |
| 0.000353 | 0.0321 | 0.765 | ENSG00000228340 | RP5-1043L13.1 | lincRNA        |
| 0.000354 | 0.0321 | 1.011 | ENSG00000177426 | TGIF1         | protein_coding |
| 0.000355 | 0.0321 | 1.047 | ENSG00000160256 | FAM207A       | protein_coding |
| 0.000361 | 0.0324 | 1.102 | ENSG00000179431 | FJX1          | protein_coding |
| 0.000367 | 0.0328 | 1.051 | ENSG00000171862 | PTEN          | protein_coding |
| 0.000369 | 0.0328 | 1.006 | ENSG00000082153 | BZW1          | protein_coding |
| 0.000387 | 0.0342 | 1.056 | ENSG00000137996 | RTCA          | protein_coding |
| 0.000399 | 0.035  | 1.03  | ENSG00000075223 | SEMA3C        | protein_coding |
| 0.000403 | 0.035  | 1.001 | ENSG00000074800 | ENO1          | protein_coding |
| 0.000403 | 0.035  | 1.036 | ENSG00000083312 | TNPO1         | protein_coding |
| 0.00041  | 0.0354 | 1.229 | ENSG00000130363 | RSPH3         | protein_coding |
| 0.000435 | 0.0372 | 1.086 | ENSG00000162688 | AGL           | protein_coding |

|          |        |       |                 |           |                |
|----------|--------|-------|-----------------|-----------|----------------|
| 0.000437 | 0.0372 | 1.009 | ENSG00000053747 | LAMA3     | protein_coding |
| 0.000438 | 0.0372 | 1.048 | ENSG00000205795 | CYS1      | protein_coding |
| 0.000443 | 0.0374 | 1.02  | ENSG00000233532 | LINC00460 | lincRNA        |
| 0.00046  | 0.0386 | 1.012 | ENSG00000196923 | PDLIM7    | protein_coding |
| 0.000462 | 0.0386 | 1.05  | ENSG00000139926 | FRMD6     | protein_coding |
| 0.000473 | 0.0392 | 1     | ENSG00000111057 | KRT18     | protein_coding |
| 0.000506 | 0.0418 | 1.04  | ENSG00000125266 | EFNB2     | protein_coding |
| 0.000537 | 0.0441 | 1.123 | ENSG00000165118 | C9orf64   | protein_coding |
| 0.000543 | 0.0443 | 1.001 | ENSG00000125148 | MT2A      | protein_coding |
| 0.000561 | 0.0455 | 1.084 | ENSG00000163697 | APBB2     | protein_coding |
| 0.000568 | 0.0456 | 1.062 | ENSG00000198826 | ARHGAP11A | protein_coding |
| 0.000568 | 0.0456 | 1.024 | ENSG00000206527 | PTPLB     | protein_coding |
| 0.000574 | 0.0458 | 1.038 | ENSG00000128591 | FLNC      | protein_coding |
| 0.000588 | 0.0467 | 1.005 | ENSG00000161203 | AP2M1     | protein_coding |
| 0.000595 | 0.047  | 1.047 | ENSG00000100003 | SEC14L2   | protein_coding |
| 0.000599 | 0.0471 | 1.078 | ENSG00000036549 | ZZZ3      | protein_coding |
| 0.000603 | 0.0471 | 1.055 | ENSG00000187079 | TEAD1     | protein_coding |
| 0.000648 | 0.0503 | 1.036 | ENSG00000165416 | SUGT1     | protein_coding |
| 0.00065  | 0.0503 | 1.034 | ENSG00000114279 | FGF12     | protein_coding |
| 0.000659 | 0.0506 | 1.107 | ENSG00000066084 | DIP2B     | protein_coding |
| 0.00066  | 0.0506 | 1.006 | ENSG00000187498 | COL4A1    | protein_coding |
| 0.000675 | 0.0514 | 1.102 | ENSG00000169410 | PTPN9     | protein_coding |
| 0.000678 | 0.0514 | 1.165 | ENSG00000163132 | MSX1      | protein_coding |
| 0.00069  | 0.0519 | 1.051 | ENSG00000174371 | EXO1      | protein_coding |
| 0.000692 | 0.0519 | 1.09  | ENSG00000134897 | BIVM      | protein_coding |
| 0.000697 | 0.052  | 1.094 | ENSG00000171262 | FAM98B    | protein_coding |
| 0.000699 | 0.052  | 1.041 | ENSG00000162607 | USP1      | protein_coding |
| 0.000708 | 0.0523 | 1.018 | ENSG00000087128 | TMPRSS11E | protein_coding |
| 0.000714 | 0.0523 | 1.05  | ENSG00000109572 | CLCN3     | protein_coding |
| 0.000714 | 0.0523 | 0.989 | ENSG00000051108 | HERPUD1   | protein_coding |
| 0.000722 | 0.0524 | 1.133 | ENSG00000047932 | GOPC      | protein_coding |
| 0.000727 | 0.0524 | 1.13  | ENSG00000071205 | ARHGAP10  | protein_coding |
| 0.000728 | 0.0524 | 0.898 | ENSG00000130413 | STK33     | protein_coding |
| 0.00073  | 0.0524 | 1.616 | ENSG00000214107 | MAGEB1    | protein_coding |
| 0.000746 | 0.0532 | 1.278 | ENSG00000123360 | PDE1B     | protein_coding |
| 0.000749 | 0.0532 | 1.054 | ENSG00000066697 | MSANTD3   | protein_coding |

|          |        |       |                 |               |                |
|----------|--------|-------|-----------------|---------------|----------------|
| 0.000767 | 0.0543 | 1.043 | ENSG00000123684 | LPGAT1        | protein_coding |
| 0.000776 | 0.0547 | 1.027 | ENSG00000145907 | G3BP1         | protein_coding |
| 0.00078  | 0.0547 | 1.01  | ENSG00000023445 | BIRC3         | protein_coding |
| 0.000812 | 0.0567 | 1.052 | ENSG00000160867 | FGFR4         | protein_coding |
| 0.000819 | 0.0567 | 1.023 | ENSG00000138166 | DUSP5         | protein_coding |
| 0.000823 | 0.0567 | 1.081 | ENSG00000090889 | KIF4A         | protein_coding |
| 0.000829 | 0.0567 | 1.107 | ENSG00000204949 | RP11-539E17.4 | antisense      |
| 0.000829 | 0.0567 | 1.057 | ENSG00000145220 | LYAR          | protein_coding |
| 0.000831 | 0.0567 | 1.002 | ENSG00000198431 | TXNRD1        | protein_coding |
| 0.000836 | 0.0567 | 1.025 | ENSG00000070961 | ATP2B1        | protein_coding |
| 0.000839 | 0.0567 | 0.973 | ENSG00000021300 | PLEKHB1       | protein_coding |
| 0.000848 | 0.0567 | 1.723 | ENSG00000205683 | DPF3          | protein_coding |
| 0.000849 | 0.0567 | 0.98  | ENSG00000153066 | TXNDC11       | protein_coding |
| 0.00085  | 0.0567 | 1.049 | ENSG00000168917 | SLC35G2       | protein_coding |
| 0.000868 | 0.0576 | 1.231 | ENSG00000100578 | KIAA0586      | protein_coding |
| 0.000877 | 0.058  | 1.011 | ENSG00000157483 | MYO1E         | protein_coding |
| 0.00089  | 0.058  | 1.024 | ENSG00000166949 | SMAD3         | protein_coding |
| 0.00089  | 0.058  | 1.021 | ENSG00000061676 | NCKAP1        | protein_coding |
| 0.000894 | 0.058  | 1.098 | ENSG00000146409 | SLC18B1       | protein_coding |
| 0.000896 | 0.058  | 1.141 | ENSG00000141655 | TNFRSF11A     | protein_coding |
| 0.000898 | 0.058  | 1.006 | ENSG00000010438 | PRSS3         | protein_coding |
| 0.000901 | 0.058  | 1.002 | ENSG00000155366 | RHOC          | protein_coding |
| 0.000909 | 0.0582 | 1.115 | ENSG00000165480 | SKA3          | protein_coding |
| 0.000914 | 0.0582 | 1.021 | ENSG00000131941 | RHPN2         | protein_coding |
| 0.000917 | 0.0582 | 1.014 | ENSG00000149948 | HMGA2         | protein_coding |
| 0.00092  | 0.0582 | 1.006 | ENSG00000161091 | MFSD12        | protein_coding |
| 0.000923 | 0.0582 | 1.051 | ENSG00000074211 | PPP2R2C       | protein_coding |
| 0.000931 | 0.0582 | 1.005 | ENSG00000159166 | LAD1          | protein_coding |
| 0.000933 | 0.0582 | 1.01  | ENSG00000197614 | MFAP5         | protein_coding |
| 0.000938 | 0.0582 | 1.035 | ENSG00000101311 | FERMT1        | protein_coding |
| 0.000941 | 0.0582 | 1.08  | ENSG00000187720 | THSD4         | protein_coding |
| 0.000946 | 0.0582 | 1.028 | ENSG00000166851 | PLK1          | protein_coding |
| 0.000947 | 0.0582 | 3.012 | ENSG00000233997 | AP000475.2    | lincRNA        |
| 0.000998 | 0.0611 | 1.104 | ENSG00000062650 | WAPAL         | protein_coding |
| 0.001011 | 0.0614 | 1.004 | ENSG00000105971 | CAV2          | protein_coding |
| 0.001012 | 0.0614 | 1.152 | ENSG00000135502 | SLC26A10      | protein_coding |



|          |        |       |                 |              |                |
|----------|--------|-------|-----------------|--------------|----------------|
| 0.001027 | 0.0619 | 1.028 | ENSG00000068366 | ACSL4        | protein_coding |
| 0.001027 | 0.0619 | 1.029 | ENSG00000114270 | COL7A1       | protein_coding |
| 0.001041 | 0.0624 | 1.037 | ENSG00000023171 | GRAMD1B      | protein_coding |
| 0.00105  | 0.0627 | 1.038 | ENSG00000107566 | ERLIN1       | protein_coding |
| 0.001058 | 0.063  | 1.195 | ENSG00000113356 | POLR3G       | protein_coding |
| 0.001076 | 0.0638 | 1.045 | ENSG00000128298 | BAIAP2L2     | protein_coding |
| 0.001093 | 0.0645 | 1.157 | ENSG00000179546 | HTR1D        | protein_coding |
| 0.0011   | 0.0645 | 1.1   | ENSG00000153885 | KCTD15       | protein_coding |
| 0.001102 | 0.0645 | 1.264 | ENSG00000120868 | APAF1        | protein_coding |
| 0.001107 | 0.0646 | 1.027 | ENSG00000128335 | APOL2        | protein_coding |
| 0.001117 | 0.0649 | 1.017 | ENSG00000137710 | RDX          | protein_coding |
| 0.001132 | 0.0654 | 1.61  | ENSG00000123560 | PLP1         | protein_coding |
| 0.001134 | 0.0654 | 0.982 | ENSG00000008283 | CYB561       | protein_coding |
| 0.001145 | 0.0658 | 1.21  | ENSG00000164045 | CDC25A       | protein_coding |
| 0.001151 | 0.0659 | 1.009 | ENSG00000086696 | HSD17B2      | protein_coding |
| 0.00116  | 0.0659 | 1.282 | ENSG00000230387 | RP4-737E23.2 | lincRNA        |
| 0.001161 | 0.0659 | 1.369 | ENSG00000074047 | GLI2         | protein_coding |
| 0.001165 | 0.0659 | 0.94  | ENSG00000177191 | B3GNT8       | protein_coding |
| 0.001173 | 0.0661 | 1.079 | ENSG00000128578 | FAM40B       | protein_coding |
| 0.001183 | 0.0663 | 1.044 | ENSG00000176170 | SPHK1        | protein_coding |
| 0.001193 | 0.0663 | 1.07  | ENSG00000164850 | GPER         | protein_coding |
| 0.001194 | 0.0663 | 1.608 | ENSG00000184258 | CDR1         | protein_coding |
| 0.001194 | 0.0663 | 1.012 | ENSG00000096060 | FKBP5        | protein_coding |
| 0.001223 | 0.0677 | 1.167 | ENSG00000186767 | SPIN4        | protein_coding |
| 0.001253 | 0.069  | 1.041 | ENSG00000140157 | NIPA2        | protein_coding |
| 0.001297 | 0.0711 | 1.003 | ENSG00000058085 | LAMC2        | protein_coding |
| 0.001299 | 0.0711 | 1.165 | ENSG00000248690 | HAS2-AS1     | antisense      |
| 0.001315 | 0.0717 | 1.05  | ENSG00000228716 | DHFR         | protein_coding |
| 0.001323 | 0.0719 | 1.062 | ENSG00000170961 | HAS2         | protein_coding |
| 0.001351 | 0.0731 | 1.024 | ENSG00000102038 | SMARCA1      | protein_coding |
| 0.001359 | 0.0733 | 1.062 | ENSG00000149798 | CDC42EP2     | protein_coding |
| 0.001372 | 0.0737 | 1.08  | ENSG00000104756 | KCTD9        | protein_coding |
| 0.001383 | 0.0741 | 1.002 | ENSG00000188643 | S100A16      | protein_coding |
| 0.00139  | 0.0741 | 1.006 | ENSG00000160014 | CALM3        | protein_coding |
| 0.001404 | 0.0746 | 1.043 | ENSG00000140263 | SORD         | protein_coding |
| 0.001417 | 0.075  | 1.044 | ENSG00000160190 | SLC37A1      | protein_coding |

|          |        |       |                 |             |                |
|----------|--------|-------|-----------------|-------------|----------------|
| 0.001428 | 0.0752 | 1.049 | ENSG00000116017 | ARID3A      | protein_coding |
| 0.001435 | 0.0752 | 1.062 | ENSG00000213918 | DNASE1      | protein_coding |
| 0.001435 | 0.0752 | 1.004 | ENSG00000198467 | TPM2        | protein_coding |
| 0.001449 | 0.0757 | 1.025 | ENSG00000172819 | RARG        | protein_coding |
| 0.001457 | 0.0759 | 1.139 | ENSG00000158402 | CDC25C      | protein_coding |
| 0.001463 | 0.0759 | 1.041 | ENSG00000065135 | GNAI3       | protein_coding |
| 0.001474 | 0.0762 | 1.005 | ENSG00000110958 | PTGES3      | protein_coding |
| 0.001487 | 0.0766 | 1.026 | ENSG00000145107 | TM4SF19     | protein_coding |
| 0.001505 | 0.077  | 1.041 | ENSG00000187288 | CIDEC       | protein_coding |
| 0.001506 | 0.077  | 1.218 | ENSG00000137812 | CASC5       | protein_coding |
| 0.001512 | 0.0771 | 1.002 | ENSG0000013588  | GPRC5A      | protein_coding |
| 0.001533 | 0.0779 | 1.081 | ENSG00000082805 | ERC1        | protein_coding |
| 0.00154  | 0.078  | 1.169 | ENSG00000184208 | C22orf46    | protein_coding |
| 0.001555 | 0.0782 | 1.202 | ENSG00000138134 | STAMBPL1    | protein_coding |
| 0.001557 | 0.0782 | 1.029 | ENSG00000153815 | CMIP        | protein_coding |
| 0.001561 | 0.0782 | 1.062 | ENSG00000077713 | SLC25A43    | protein_coding |
| 0.00158  | 0.0788 | 1.001 | ENSG00000102265 | TIMP1       | protein_coding |
| 0.001584 | 0.0788 | 1.02  | ENSG00000121774 | KHDRBS1     | protein_coding |
| 0.0016   | 0.0794 | 1.032 | ENSG00000224081 | RP11-86H7.1 | lincRNA        |
| 0.001629 | 0.0805 | 1.002 | ENSG00000021826 | CPS1        | protein_coding |
| 0.001632 | 0.0805 | 1.128 | ENSG00000163535 | SGOL2       | protein_coding |
| 0.00164  | 0.0806 | 1.088 | ENSG00000140950 | KIAA1609    | protein_coding |
| 0.001667 | 0.0815 | 1.015 | ENSG00000138071 | ACTR2       | protein_coding |
| 0.001673 | 0.0815 | 1.009 | ENSG00000121316 | PLBD1       | protein_coding |
| 0.001674 | 0.0815 | 1.033 | ENSG00000111145 | ELK3        | protein_coding |
| 0.00169  | 0.0818 | 1.37  | ENSG00000203926 | SPANXA2     | protein_coding |
| 0.001692 | 0.0818 | 1.078 | ENSG00000204540 | PSORS1C1    | protein_coding |
| 0.001701 | 0.082  | 1.048 | ENSG00000068489 | PRR11       | protein_coding |
| 0.001714 | 0.0823 | 1.015 | ENSG00000101000 | PROCR       | protein_coding |
| 0.001718 | 0.0823 | 1.025 | ENSG00000079112 | CDH17       | protein_coding |
| 0.001727 | 0.0824 | 1.368 | ENSG00000198021 | SPANXA1     | protein_coding |
| 0.001734 | 0.0825 | 1.002 | ENSG00000112096 | SOD2        | protein_coding |
| 0.00177  | 0.0839 | 1.022 | ENSG00000175183 | CSRP2       | protein_coding |
| 0.001789 | 0.0846 | 1.073 | ENSG00000173210 | ABLIM3      | protein_coding |
| 0.001807 | 0.0851 | 1.017 | ENSG00000170248 | PDCD6IP     | protein_coding |
| 0.001811 | 0.0851 | 1.004 | ENSG00000175166 | PSMD2       | protein_coding |

|          |        |       |                 |           |                |
|----------|--------|-------|-----------------|-----------|----------------|
| 0.001819 | 0.0852 | 0.911 | ENSG00000121104 | FAM117A   | protein_coding |
| 0.00183  | 0.0854 | 1.017 | ENSG00000155115 | GTF3C6    | protein_coding |
| 0.001844 | 0.0855 | 1.394 | ENSG00000119042 | SATB2     | protein_coding |
| 0.001848 | 0.0855 | 1.046 | ENSG00000170779 | CDCA4     | protein_coding |
| 0.001849 | 0.0855 | 1.021 | ENSG00000143179 | UCK2      | protein_coding |
| 0.001863 | 0.0855 | 1.093 | ENSG00000180263 | FGD6      | protein_coding |
| 0.001865 | 0.0855 | 1.026 | ENSG00000168175 | MAPK1IP1L | protein_coding |
| 0.001867 | 0.0855 | 0.977 | ENSG00000245694 | CRNDE     | lincRNA        |
| 0.001885 | 0.0861 | 1.145 | ENSG00000131969 | ABHD12B   | protein_coding |
| 0.001892 | 0.0861 | 1.03  | ENSG00000100714 | MTHFD1    | protein_coding |
| 0.001902 | 0.0861 | 1.041 | ENSG00000145386 | CCNA2     | protein_coding |
| 0.001904 | 0.0861 | 1.011 | ENSG00000103335 | PIEZO1    | protein_coding |
| 0.001908 | 0.0861 | 1.006 | ENSG00000152952 | PLOD2     | protein_coding |
| 0.001958 | 0.0876 | 0.828 | ENSG00000135951 | TSGA10    | protein_coding |
| 0.001962 | 0.0876 | 1.072 | ENSG00000180287 | PLD5      | protein_coding |
| 0.001963 | 0.0876 | 1.006 | ENSG00000196419 | XRCC6     | protein_coding |
| 0.001964 | 0.0876 | 1.018 | ENSG00000183386 | FHL3      | protein_coding |
| 0.001981 | 0.088  | 1.042 | ENSG00000185551 | NR2F2     | protein_coding |
| 0.001994 | 0.0884 | 1.076 | ENSG00000053524 | MCF2L2    | protein_coding |
| 0.002029 | 0.0894 | 1.099 | ENSG00000102786 | INTS6     | protein_coding |
| 0.00203  | 0.0894 | 1.056 | ENSG00000112984 | KIF20A    | protein_coding |
| 0.002043 | 0.0895 | 1.142 | ENSG00000012174 | MBTPS2    | protein_coding |
| 0.002049 | 0.0895 | 1.024 | ENSG00000100412 | ACO2      | protein_coding |
| 0.00205  | 0.0895 | 1.108 | ENSG00000171241 | SHCBP1    | protein_coding |
| 0.002059 | 0.0896 | 1.122 | ENSG00000132297 | HHLA1     | protein_coding |
| 0.002067 | 0.0896 | 1.06  | ENSG00000156273 | BACH1     | protein_coding |
| 0.002081 | 0.0896 | 1.129 | ENSG00000139132 | FGD4      | protein_coding |
| 0.002087 | 0.0896 | 1.142 | ENSG00000196406 | SPANXD    | protein_coding |
| 0.002095 | 0.0896 | 1.029 | ENSG00000104312 | RIPK2     | protein_coding |
| 0.002098 | 0.0896 | 1.145 | ENSG00000077092 | RARB      | protein_coding |
| 0.002099 | 0.0896 | 1.018 | ENSG00000101144 | BMP7      | protein_coding |
| 0.002101 | 0.0896 | 1.069 | ENSG00000169752 | NRG4      | protein_coding |
| 0.002154 | 0.0917 | 1.065 | ENSG00000187634 | SAMD11    | protein_coding |
| 0.002177 | 0.0924 | 0.888 | ENSG00000105516 | DBP       | protein_coding |
| 0.002206 | 0.0932 | 1.055 | ENSG00000087303 | NID2      | protein_coding |
| 0.002208 | 0.0932 | 1.016 | ENSG00000116489 | CAPZA1    | protein_coding |

|          |        |       |                 |          |                |
|----------|--------|-------|-----------------|----------|----------------|
| 0.002223 | 0.0935 | 1.025 | ENSG00000136231 | IGF2BP3  | protein_coding |
| 0.002256 | 0.0941 | 1.042 | ENSG00000057294 | PKP2     | protein_coding |
| 0.002262 | 0.0941 | 1.015 | ENSG00000163297 | ANTXR2   | protein_coding |
| 0.002263 | 0.0941 | 1.04  | ENSG00000152492 | CCDC50   | protein_coding |
| 0.002264 | 0.0941 | 1.022 | ENSG00000088002 | SULT2B1  | protein_coding |
| 0.002268 | 0.0941 | 1.076 | ENSG00000205726 | ITSN1    | protein_coding |
| 0.002296 | 0.095  | 3.32  | ENSG00000186297 | GABRA5   | protein_coding |
| 0.002333 | 0.0963 | 1.048 | ENSG00000165934 | CPSF2    | protein_coding |
| 0.002348 | 0.0964 | 1.052 | ENSG00000132388 | UBE2G1   | protein_coding |
| 0.002349 | 0.0964 | 1.069 | ENSG00000161813 | LARP4    | protein_coding |
| 0.002362 | 0.0966 | 1.127 | ENSG00000169946 | ZFPM2    | protein_coding |
| 0.002368 | 0.0966 | 1.049 | ENSG00000126787 | DLGAP5   | protein_coding |
| 0.002383 | 0.0966 | 1.009 | ENSG00000140350 | ANP32A   | protein_coding |
| 0.002391 | 0.0966 | 1.233 | ENSG00000145414 | NAF1     | protein_coding |
| 0.002393 | 0.0966 | 1.037 | ENSG00000004700 | RECQL    | protein_coding |
| 0.002394 | 0.0966 | 1.018 | ENSG00000198901 | PRC1     | protein_coding |
| 0.002421 | 0.0974 | 1.007 | ENSG00000083444 | PLOD1    | protein_coding |
| 0.002429 | 0.0974 | 1.142 | ENSG00000182885 | GPR97    | protein_coding |
| 0.002431 | 0.0974 | 1.023 | ENSG00000172380 | GNG12    | protein_coding |
| 0.002439 | 0.0974 | 1.217 | ENSG00000198797 | FAM5B    | protein_coding |
| 0.002456 | 0.0978 | 1.042 | ENSG00000136636 | KCTD3    | protein_coding |
| 0.002468 | 0.0978 | 1.175 | ENSG00000168143 | FAM83B   | protein_coding |
| 0.002468 | 0.0978 | 1.02  | ENSG00000077150 | NFKB2    | protein_coding |
| 0.002475 | 0.0978 | 1.084 | ENSG00000110756 | HPS5     | protein_coding |
| 0.002533 | 0.0998 | 1.007 | ENSG00000113296 | THBS4    | protein_coding |
| 0.002552 | 0.1    | 1.199 | ENSG00000143498 | TAF1A    | protein_coding |
| 0.002585 | 0.101  | 1.081 | ENSG00000164211 | STARD4   | protein_coding |
| 0.002585 | 0.101  | 1.043 | ENSG00000136045 | PWP1     | protein_coding |
| 0.002599 | 0.101  | 1.142 | ENSG00000162975 | KCNF1    | protein_coding |
| 0.002605 | 0.101  | 1.013 | ENSG00000104881 | PPP1R13L | protein_coding |
| 0.002607 | 0.101  | 1.019 | ENSG00000164171 | ITGA2    | protein_coding |
| 0.002608 | 0.101  | 1.035 | ENSG00000148935 | GAS2     | protein_coding |
| 0.002611 | 0.101  | 1.025 | ENSG00000050820 | BCAR1    | protein_coding |
| 0.002628 | 0.101  | 1.076 | ENSG00000184992 | BRI3BP   | protein_coding |
| 0.002631 | 0.101  | 1.021 | ENSG00000136826 | KLF4     | protein_coding |
| 0.002666 | 0.102  | 1.128 | ENSG00000169258 | GPRIN1   | protein_coding |

|          |       |       |                 |              |                |
|----------|-------|-------|-----------------|--------------|----------------|
| 0.002667 | 0.102 | 1.059 | ENSG00000226605 | AC007098.1   | antisense      |
| 0.002667 | 0.102 | 1.198 | ENSG00000138182 | KIF20B       | protein_coding |
| 0.002698 | 0.102 | 1.038 | ENSG00000080986 | NDC80        | protein_coding |
| 0.00271  | 0.102 | 1     | ENSG00000163993 | S100P        | protein_coding |
| 0.002719 | 0.102 | 0.94  | ENSG00000176842 | IRX5         | protein_coding |
| 0.002722 | 0.102 | 1.024 | ENSG00000175029 | CTBP2        | protein_coding |
| 0.002723 | 0.102 | 1.106 | ENSG00000111087 | GLI1         | protein_coding |
| 0.002729 | 0.102 | 1.215 | ENSG00000234147 | RP3-460G2.2  | lincRNA        |
| 0.00273  | 0.102 | 1     | ENSG00000182718 | ANXA2        | protein_coding |
| 0.002737 | 0.102 | 1.01  | ENSG00000134001 | EIF2S1       | protein_coding |
| 0.002744 | 0.102 | 1.092 | ENSG00000169857 | AVEN         | protein_coding |
| 0.002763 | 0.103 | 1.052 | ENSG00000135454 | B4GALNT1     | protein_coding |
| 0.002799 | 0.104 | 1.021 | ENSG00000114346 | ECT2         | protein_coding |
| 0.002807 | 0.104 | 1.064 | ENSG00000185340 | GAS2L1       | protein_coding |
| 0.002838 | 0.105 | 1.041 | ENSG00000080815 | PSEN1        | protein_coding |
| 0.002871 | 0.106 | 1.093 | ENSG00000150457 | LATS2        | protein_coding |
| 0.002876 | 0.106 | 1.397 | ENSG00000171451 | DSEL         | protein_coding |
| 0.002884 | 0.106 | 1.064 | ENSG00000137819 | PAQR5        | protein_coding |
| 0.002903 | 0.106 | 1.029 | ENSG00000165732 | DDX21        | protein_coding |
| 0.002936 | 0.107 | 1.197 | ENSG00000171914 | TLN2         | protein_coding |
| 0.002946 | 0.107 | 1.218 | ENSG00000250312 | ZNF718       | protein_coding |
| 0.002949 | 0.107 | 1.072 | ENSG00000233621 | RP11-422J8.1 | antisense      |
| 0.002984 | 0.108 | 1.116 | ENSG00000224167 | RP3-522D1.1  | lincRNA        |
| 0.002996 | 0.108 | 1.006 | ENSG00000072110 | ACTN1        | protein_coding |
| 0.003029 | 0.109 | 1.043 | ENSG00000072401 | UBE2D1       | protein_coding |
| 0.003036 | 0.109 | 1.137 | ENSG00000116704 | SLC35D1      | protein_coding |
| 0.003036 | 0.109 | 1.011 | ENSG00000162545 | CAMK2N1      | protein_coding |
| 0.003048 | 0.109 | 1.109 | ENSG00000186001 | LRCH3        | protein_coding |
| 0.003058 | 0.109 | 1.008 | ENSG00000159840 | ZYX          | protein_coding |
| 0.003085 | 0.11  | 1.118 | ENSG00000118007 | STAG1        | protein_coding |
| 0.003104 | 0.11  | 1.114 | ENSG00000024526 | DEPDC1       | protein_coding |
| 0.003114 | 0.11  | 0.973 | ENSG00000102409 | BEX4         | protein_coding |
| 0.003194 | 0.113 | 1.026 | ENSG00000115963 | RND3         | protein_coding |
| 0.003214 | 0.113 | 1.082 | ENSG00000137875 | BCL2L10      | protein_coding |
| 0.003219 | 0.113 | 1.078 | ENSG00000148634 | HERC4        | protein_coding |
| 0.003241 | 0.114 | 1.059 | ENSG00000232533 | AC093673.5   | antisense      |

|          |       |       |                 |               |                |
|----------|-------|-------|-----------------|---------------|----------------|
| 0.003245 | 0.114 | 1.041 | ENSG00000100722 | ZC3H14        | protein_coding |
| 0.003258 | 0.114 | 1.008 | ENSG00000086062 | B4GALT1       | protein_coding |
| 0.003262 | 0.114 | 1.185 | ENSG00000104321 | TRPA1         | protein_coding |
| 0.003277 | 0.114 | 1.011 | ENSG00000134686 | PHC2          | protein_coding |
| 0.003296 | 0.114 | 1.012 | ENSG00000146112 | PPP1R18       | protein_coding |
| 0.003338 | 0.115 | 1.03  | ENSG00000088826 | SMOX          | protein_coding |
| 0.003345 | 0.115 | 1.022 | ENSG00000153827 | TRIP12        | protein_coding |
| 0.003356 | 0.115 | 1.068 | ENSG00000119953 | SMNDC1        | protein_coding |
| 0.00336  | 0.115 | 1.037 | ENSG00000163874 | ZC3H12A       | protein_coding |
| 0.0034   | 0.117 | 1.03  | ENSG00000205213 | LGR4          | protein_coding |
| 0.003412 | 0.117 | 1.021 | ENSG00000171310 | CHST11        | protein_coding |
| 0.003454 | 0.118 | 1.087 | ENSG00000120647 | CCDC77        | protein_coding |
| 0.003461 | 0.118 | 1.047 | ENSG00000107897 | ACBD5         | protein_coding |
| 0.003467 | 0.118 | 1.001 | ENSG00000196230 | TUBB          | protein_coding |
| 0.003474 | 0.118 | 1.006 | ENSG00000054277 | OPN3          | protein_coding |
| 0.003486 | 0.118 | 1.056 | ENSG00000169255 | B3GALNT1      | protein_coding |
| 0.003486 | 0.118 | 1.927 | ENSG00000226792 | LINC00371     | lincRNA        |
| 0.0035   | 0.118 | 1.033 | ENSG00000168487 | BMP1          | protein_coding |
| 0.003528 | 0.118 | 1.018 | ENSG00000155380 | SLC16A1       | protein_coding |
| 0.003538 | 0.118 | 1.089 | ENSG00000244649 | CTD-2377D24.6 | lincRNA        |
| 0.003554 | 0.118 | 1.181 | ENSG00000233608 | TWIST2        | protein_coding |
| 0.00356  | 0.118 | 1.007 | ENSG00000185033 | SEMA4B        | protein_coding |
| 0.003562 | 0.118 | 1.16  | ENSG00000184661 | CDCA2         | protein_coding |
| 0.003569 | 0.118 | 1.043 | ENSG00000111737 | RAB35         | protein_coding |
| 0.00359  | 0.119 | 1.532 | ENSG00000106714 | CNTNAP3       | protein_coding |
| 0.003601 | 0.119 | 1.022 | ENSG00000087586 | AURKA         | protein_coding |
| 0.003612 | 0.119 | 1.249 | ENSG00000170537 | TMC7          | protein_coding |
| 0.003614 | 0.119 | 1.079 | ENSG00000138386 | NAB1          | protein_coding |
| 0.003657 | 0.12  | 0.932 | ENSG00000084764 | MAPRE3        | protein_coding |
| 0.003671 | 0.12  | 1     | ENSG00000197747 | S100A10       | protein_coding |
| 0.003678 | 0.12  | 1.044 | ENSG00000108064 | TFAM          | protein_coding |
| 0.003696 | 0.12  | 1.04  | ENSG00000136108 | CKAP2         | protein_coding |
| 0.003698 | 0.12  | 1.015 | ENSG00000151239 | TWF1          | protein_coding |
| 0.003774 | 0.123 | 1.01  | ENSG00000170515 | PA2G4         | protein_coding |
| 0.003786 | 0.123 | 0.906 | ENSG00000124215 | CDH26         | protein_coding |
| 0.003806 | 0.123 | 1.001 | ENSG00000172757 | CFL1          | protein_coding |

|          |       |         |                 |              |                |
|----------|-------|---------|-----------------|--------------|----------------|
| 0.003816 | 0.123 | 1.014   | ENSG00000170323 | FABP4        | protein_coding |
| 0.003825 | 0.123 | 1.007   | ENSG00000067182 | TNFRSF1A     | protein_coding |
| 0.003893 | 0.125 | 1.007   | ENSG00000124762 | CDKN1A       | protein_coding |
| 0.003921 | 0.126 | 1.05    | ENSG00000100311 | PDGFB        | protein_coding |
| 0.003924 | 0.126 | 1.028   | ENSG00000135766 | EGLN1        | protein_coding |
| 0.003938 | 0.126 | 1.092   | ENSG00000100557 | C14orf105    | protein_coding |
| 0.003951 | 0.126 | 0.915   | ENSG00000180096 | 41883        | protein_coding |
| 0.003979 | 0.126 | 1.059   | ENSG00000186432 | KPNA4        | protein_coding |
| 0.003982 | 0.126 | 1.025   | ENSG00000177706 | FAM20C       | protein_coding |
| 0.003988 | 0.126 | 1.086   | ENSG00000143493 | INTS7        | protein_coding |
| 0.003989 | 0.126 | 1.001   | ENSG00000120708 | TGFBI        | protein_coding |
| 0.003996 | 0.126 | 0.829   | ENSG00000232442 | CTD-3184A7.4 | antisense      |
| 0.004012 | 0.126 | 1.016   | ENSG00000162745 | OLFML2B      | protein_coding |
| 0.004012 | 0.126 | 1.019   | ENSG00000213782 | DDX47        | protein_coding |
| 0.004016 | 0.126 | 1.051   | ENSG00000132906 | CASP9        | protein_coding |
| 0.004054 | 0.127 | 0.9     | ENSG00000172116 | CD8B         | protein_coding |
| 0.004061 | 0.127 | 1.113   | ENSG00000139350 | NEDD1        | protein_coding |
| 0.004079 | 0.127 | 1.043   | ENSG00000162302 | RPS6KA4      | protein_coding |
| 0.004117 | 0.128 | 1.016   | ENSG00000112972 | HMGCS1       | protein_coding |
| 0.004133 | 0.128 | 1.182   | ENSG00000198853 | RUSC2        | protein_coding |
| 0.00417  | 0.129 | 1.032   | ENSG00000146242 | TPBG         | protein_coding |
| 0.004177 | 0.129 | 1.008   | ENSG00000120438 | TCP1         | protein_coding |
| 0.004208 | 0.13  | 1.011   | ENSG00000171848 | RRM2         | protein_coding |
| 0.004215 | 0.13  | 1.012   | ENSG00000148926 | ADM          | protein_coding |
| 0.004255 | 0.131 | 1.023   | ENSG00000135316 | SYNCRIP      | protein_coding |
| 0.004264 | 0.131 | 102.326 | ENSG00000250600 | ROPN1L-AS1   | antisense      |
| 0.004318 | 0.132 | 1.005   | ENSG00000140297 | GCNT3        | protein_coding |
| 0.004319 | 0.132 | 1.152   | ENSG00000107560 | RAB11FIP2    | protein_coding |
| 0.004338 | 0.132 | 1.183   | ENSG00000171320 | ESCO2        | protein_coding |
| 0.004354 | 0.132 | 0.789   | ENSG00000204950 | LRRC10B      | protein_coding |
| 0.004397 | 0.133 | 1.113   | ENSG00000152782 | PANK1        | protein_coding |
| 0.00442  | 0.134 | 1.034   | ENSG00000128944 | C15orf23     | protein_coding |
| 0.004484 | 0.135 | 0.241   | ENSG00000125409 | TEKT3        | protein_coding |
| 0.004495 | 0.135 | 0.749   | ENSG00000173875 | ZNF791       | protein_coding |
| 0.004517 | 0.136 | 1.146   | ENSG00000154127 | UBASH3B      | protein_coding |
| 0.004524 | 0.136 | 1.212   | ENSG00000137449 | CPEB2        | protein_coding |

|          |       |       |                 |         |                |
|----------|-------|-------|-----------------|---------|----------------|
| 0.004533 | 0.136 | 1.047 | ENSG00000123352 | SPATS2  | protein_coding |
| 0.004547 | 0.136 | 1.054 | ENSG00000103671 | TRIP4   | protein_coding |
| 0.004554 | 0.136 | 1.04  | ENSG00000066248 | NGEF    | protein_coding |
| 0.004575 | 0.136 | 1.065 | ENSG00000105991 | HOXA1   | protein_coding |
| 0.00462  | 0.137 | 1.014 | ENSG00000120802 | TMPO    | protein_coding |
| 0.004624 | 0.137 | 1.027 | ENSG00000180370 | PAK2    | protein_coding |
| 0.004632 | 0.137 | 1.095 | ENSG00000170677 | SOCS6   | protein_coding |
| 0.004684 | 0.138 | 0.974 | ENSG00000113621 | TXNDC15 | protein_coding |
| 0.004724 | 0.139 | 1.001 | ENSG00000123416 | TUBA1B  | protein_coding |
| 0.004733 | 0.139 | 1.032 | ENSG00000162433 | AK4     | protein_coding |
| 0.004742 | 0.139 | 1.043 | ENSG00000115504 | EHBP1   | protein_coding |
| 0.00477  | 0.14  | 1.008 | ENSG00000167900 | TK1     | protein_coding |
| 0.00483  | 0.141 | 1.009 | ENSG00000102572 | STK24   | protein_coding |
| 0.004834 | 0.141 | 1.242 | ENSG00000185046 | ANKS1B  | protein_coding |
| 0.004872 | 0.142 | 0.911 | ENSG00000115325 | DOK1    | protein_coding |
| 0.004883 | 0.142 | 1.006 | ENSG00000166532 | RIMKLB  | protein_coding |
| 0.004942 | 0.143 | 1.068 | ENSG00000114450 | GNB4    | protein_coding |
| 0.004944 | 0.143 | 1.139 | ENSG00000142623 | PADI1   | protein_coding |
| 0.004955 | 0.143 | 1.047 | ENSG00000133119 | RFC3    | protein_coding |
| 0.004955 | 0.143 | 1.002 | ENSG00000197111 | PCBP2   | protein_coding |
| 0.004984 | 0.143 | 1.041 | ENSG00000149554 | CHEK1   | protein_coding |
| 0.004994 | 0.143 | 1.033 | ENSG00000072518 | MARK2   | protein_coding |
| 0.004995 | 0.143 | 1.028 | ENSG00000100221 | JOSD1   | protein_coding |
| 0.005012 | 0.143 | 1.01  | ENSG00000070404 | FSTL3   | protein_coding |
| 0.005027 | 0.144 | 1.068 | ENSG00000137251 | TINAG   | protein_coding |
| 0.00506  | 0.144 | 0.966 | ENSG00000105552 | BCAT2   | protein_coding |
| 0.005066 | 0.144 | 1.101 | ENSG00000180611 | MB21D2  | protein_coding |
| 0.005068 | 0.144 | 1.018 | ENSG00000176890 | TYMS    | protein_coding |
| 0.005079 | 0.144 | 1.099 | ENSG00000066279 | ASPM    | protein_coding |
| 0.0051   | 0.144 | 1.002 | ENSG00000122862 | SRGN    | protein_coding |
| 0.005136 | 0.145 | 1.001 | ENSG00000110955 | ATP5B   | protein_coding |
| 0.00515  | 0.145 | 1.176 | ENSG00000131725 | WDR44   | protein_coding |
| 0.005156 | 0.145 | 1.008 | ENSG00000106682 | EIF4H   | protein_coding |
| 0.005161 | 0.145 | 0.765 | ENSG00000050438 | SLC4A8  | protein_coding |
| 0.005166 | 0.145 | 1.202 | ENSG00000164506 | STXBP5  | protein_coding |
| 0.005196 | 0.145 | 1.163 | ENSG00000113273 | ARSB    | protein_coding |



|          |       |       |                 |           |                |
|----------|-------|-------|-----------------|-----------|----------------|
| 0.005213 | 0.146 | 1.034 | ENSG00000140525 | FANCI     | protein_coding |
| 0.005255 | 0.146 | 1.064 | ENSG00000171033 | PKIA      | protein_coding |
| 0.005267 | 0.146 | 0.999 | ENSG00000189377 | CXCL17    | protein_coding |
| 0.005272 | 0.146 | 1.041 | ENSG00000162627 | SNX7      | protein_coding |
| 0.005284 | 0.146 | 1.059 | ENSG00000065183 | WDR3      | protein_coding |
| 0.005285 | 0.146 | 1.001 | ENSG00000169908 | TM4SF1    | protein_coding |
| 0.00533  | 0.147 | 1.002 | ENSG00000198363 | ASPH      | protein_coding |
| 0.005376 | 0.148 | 1.01  | ENSG00000134057 | CCNB1     | protein_coding |
| 0.005407 | 0.149 | 1.06  | ENSG00000130270 | ATP8B3    | protein_coding |
| 0.005408 | 0.149 | 0.989 | ENSG00000159212 | CLIC6     | protein_coding |
| 0.005426 | 0.149 | 1.009 | ENSG00000162772 | ATF3      | protein_coding |
| 0.005473 | 0.15  | 1.032 | ENSG00000169032 | MAP2K1    | protein_coding |
| 0.005489 | 0.15  | 1.009 | ENSG00000135862 | LAMC1     | protein_coding |
| 0.005626 | 0.153 | 1.425 | ENSG00000189410 | SH2D5     | protein_coding |
| 0.005645 | 0.153 | 1.111 | ENSG00000138660 | AP1AR     | protein_coding |
| 0.005649 | 0.153 | 1.009 | ENSG00000139112 | GABARAPL1 | protein_coding |
| 0.005656 | 0.153 | 1.033 | ENSG00000114480 | GBE1      | protein_coding |
| 0.005735 | 0.155 | 1.061 | ENSG00000204531 | POU5F1    | protein_coding |
| 0.005749 | 0.155 | 1.01  | ENSG00000117399 | CDC20     | protein_coding |
| 0.005815 | 0.157 | 1.109 | ENSG00000198088 | NUP62CL   | protein_coding |
| 0.00582  | 0.157 | 1.045 | ENSG00000183864 | TOB2      | protein_coding |
| 0.005826 | 0.157 | 1.017 | ENSG00000206075 | SERPINB5  | protein_coding |
| 0.005885 | 0.158 | 1.045 | ENSG00000203668 | CHML      | protein_coding |
| 0.005905 | 0.158 | 1.158 | ENSG00000152104 | PTPN14    | protein_coding |
| 0.005919 | 0.158 | 1.102 | ENSG00000182963 | GJC1      | protein_coding |
| 0.005936 | 0.158 | 1.112 | ENSG00000162694 | EXTL2     | protein_coding |
| 0.005977 | 0.159 | 0.988 | ENSG00000134802 | SLC43A3   | protein_coding |
| 0.005981 | 0.159 | 1.011 | ENSG00000071054 | MAP4K4    | protein_coding |
| 0.005987 | 0.159 | 1.1   | ENSG00000185386 | MAPK11    | protein_coding |
| 0.006121 | 0.162 | 1.027 | ENSG00000136943 | CTSL2     | protein_coding |
| 0.006133 | 0.162 | 0.897 | ENSG00000136878 | USP20     | protein_coding |
| 0.006137 | 0.162 | 0.71  | ENSG00000176029 | C11orf16  | protein_coding |
| 0.006146 | 0.162 | 1.041 | ENSG00000100320 | RBFOX2    | protein_coding |
| 0.006155 | 0.162 | 0.813 | ENSG00000004660 | CAMKK1    | protein_coding |
| 0.006272 | 0.165 | 1.01  | ENSG00000196591 | HDAC2     | protein_coding |
| 0.006321 | 0.166 | 1.058 | ENSG00000185591 | SP1       | protein_coding |

|          |       |       |                 |            |                |
|----------|-------|-------|-----------------|------------|----------------|
| 0.006352 | 0.166 | 1.013 | ENSG00000134294 | SLC38A2    | protein_coding |
| 0.006371 | 0.166 | 0.815 | ENSG00000235280 | MCF2L-AS1  | antisense      |
| 0.006376 | 0.166 | 1.05  | ENSG00000177119 | ANO6       | protein_coding |
| 0.006392 | 0.166 | 1.056 | ENSG00000163681 | SLMAP      | protein_coding |
| 0.006432 | 0.167 | 1.061 | ENSG00000156970 | BUB1B      | protein_coding |
| 0.006441 | 0.167 | 1.024 | ENSG00000174891 | RSRC1      | protein_coding |
| 0.006455 | 0.167 | 1.397 | ENSG00000113749 | HRH2       | protein_coding |
| 0.006462 | 0.167 | 1.016 | ENSG00000065150 | IPO5       | protein_coding |
| 0.006483 | 0.167 | 1.42  | ENSG00000155897 | ADCY8      | protein_coding |
| 0.006487 | 0.167 | 1.005 | ENSG00000004478 | FKBP4      | protein_coding |
| 0.006504 | 0.167 | 1.157 | ENSG00000130962 | PRRG1      | protein_coding |
| 0.00655  | 0.167 | 1.022 | ENSG00000120675 | DNAJC15    | protein_coding |
| 0.006552 | 0.167 | 1.043 | ENSG00000136603 | SKIL       | protein_coding |
| 0.006564 | 0.167 | 1.054 | ENSG00000138160 | KIF11      | protein_coding |
| 0.006564 | 0.167 | 1.046 | ENSG00000123485 | HJURP      | protein_coding |
| 0.006571 | 0.167 | 1.022 | ENSG00000165410 | CFL2       | protein_coding |
| 0.006576 | 0.167 | 0.992 | ENSG00000141934 | PPAP2C     | protein_coding |
| 0.006577 | 0.167 | 1.027 | ENSG00000197713 | RPE        | protein_coding |
| 0.006594 | 0.167 | 1.013 | ENSG00000023697 | DERA       | protein_coding |
| 0.006615 | 0.167 | 1.281 | ENSG00000137760 | ALKBH8     | protein_coding |
| 0.006619 | 0.167 | 1.019 | ENSG00000005020 | SKAP2      | protein_coding |
| 0.006637 | 0.167 | 1.073 | ENSG00000163069 | SGCB       | protein_coding |
| 0.00668  | 0.168 | 1.048 | ENSG00000142892 | PIGK       | protein_coding |
| 0.006681 | 0.168 | 1.105 | ENSG00000092853 | CLSPN      | protein_coding |
| 0.006687 | 0.168 | 1.038 | ENSG00000133961 | NUMB       | protein_coding |
| 0.006696 | 0.168 | 1.05  | ENSG00000166130 | IKBIP      | protein_coding |
| 0.006754 | 0.169 | 0.999 | ENSG00000180879 | SSR4       | protein_coding |
| 0.006767 | 0.169 | 1.008 | ENSG00000163898 | LIPH       | protein_coding |
| 0.006783 | 0.169 | 1.028 | ENSG00000078804 | TP53INP2   | protein_coding |
| 0.006788 | 0.169 | 1.054 | ENSG00000174804 | FZD4       | protein_coding |
| 0.006793 | 0.169 | 1.046 | ENSG00000183098 | GPC6       | protein_coding |
| 0.006834 | 0.17  | 0.766 | ENSG00000167487 | KLHL26     | protein_coding |
| 0.006856 | 0.17  | 1.045 | ENSG00000157890 | MEGF11     | protein_coding |
| 0.006876 | 0.17  | 1.015 | ENSG00000067082 | KLF6       | protein_coding |
| 0.006888 | 0.17  | 1.025 | ENSG00000181104 | F2R        | protein_coding |
| 0.006905 | 0.17  | 0.836 | ENSG00000225889 | AC074289.1 | antisense      |

|          |       |       |                 |               |                |
|----------|-------|-------|-----------------|---------------|----------------|
| 0.00691  | 0.17  | 1.02  | ENSG00000170955 | PRKCDBP       | protein_coding |
| 0.006956 | 0.171 | 1.041 | ENSG00000170542 | SERPINB9      | protein_coding |
| 0.006968 | 0.171 | 0.988 | ENSG00000091490 | SEL1L3        | protein_coding |
| 0.006977 | 0.171 | 1.075 | ENSG00000154229 | PRKCA         | protein_coding |
| 0.007008 | 0.171 | 1.087 | ENSG00000075218 | GTSE1         | protein_coding |
| 0.007021 | 0.171 | 1.124 | ENSG00000196747 | HIST1H2AI     | protein_coding |
| 0.007026 | 0.171 | 0.938 | ENSG00000141542 | RAB40B        | protein_coding |
| 0.00709  | 0.172 | 1.031 | ENSG00000106004 | HOXA5         | protein_coding |
| 0.007115 | 0.173 | 1.075 | ENSG00000166510 | CCDC68        | protein_coding |
| 0.007128 | 0.173 | 1.071 | ENSG00000054179 | ENTPD2        | protein_coding |
| 0.007189 | 0.174 | 1.053 | ENSG00000125744 | RTN2          | protein_coding |
| 0.007191 | 0.174 | 1.042 | ENSG00000023572 | GLRX2         | protein_coding |
| 0.007218 | 0.174 | 1.014 | ENSG00000111206 | FOXM1         | protein_coding |
| 0.00727  | 0.175 | 1.081 | ENSG00000198554 | WDHD1         | protein_coding |
| 0.007334 | 0.176 | 0.878 | ENSG00000204711 | C9orf135      | protein_coding |
| 0.007346 | 0.176 | 1.029 | ENSG00000116212 | LRRC42        | protein_coding |
| 0.007391 | 0.177 | 1.102 | ENSG00000118596 | SLC16A7       | protein_coding |
| 0.007399 | 0.177 | 0.885 | ENSG00000101844 | ATG4A         | protein_coding |
| 0.007416 | 0.177 | 0.97  | ENSG00000185909 | KLHDC8B       | protein_coding |
| 0.007418 | 0.177 | 1.067 | ENSG00000121481 | RNF2          | protein_coding |
| 0.007453 | 0.178 | 1.018 | ENSG00000064961 | HMG20B        | protein_coding |
| 0.007539 | 0.179 | 1.041 | ENSG00000166579 | NDEL1         | protein_coding |
| 0.007557 | 0.179 | 1.032 | ENSG00000170558 | CDH2          | protein_coding |
| 0.007562 | 0.179 | 1.123 | ENSG00000175048 | ZDHHC14       | protein_coding |
| 0.007576 | 0.179 | 1.07  | ENSG00000134371 | CDC73         | protein_coding |
| 0.007589 | 0.179 | 1.108 | ENSG00000125726 | CD70          | protein_coding |
| 0.007599 | 0.179 | 1.015 | ENSG00000141959 | PFKL          | protein_coding |
| 0.007613 | 0.179 | 1.108 | ENSG00000054690 | PLEKHH1       | protein_coding |
| 0.007637 | 0.18  | 0.639 | ENSG00000205038 | PKHD1L1       | protein_coding |
| 0.007647 | 0.18  | 1.002 | ENSG00000116285 | ERRFI1        | protein_coding |
| 0.007667 | 0.18  | 1.069 | ENSG00000168404 | MLKL          | protein_coding |
| 0.007668 | 0.18  | 1.008 | ENSG00000103257 | SLC7A5        | protein_coding |
| 0.007687 | 0.18  | 1.076 | ENSG00000204610 | TRIM15        | protein_coding |
| 0.007711 | 0.18  | 1.06  | ENSG00000149782 | PLCB3         | protein_coding |
| 0.007717 | 0.18  | 4.516 | ENSG00000228536 | RP11-392O17.1 | lincRNA        |
| 0.007733 | 0.18  | 1.131 | ENSG00000139354 | GAS2L3        | protein_coding |

|          |       |       |                 |              |                |
|----------|-------|-------|-----------------|--------------|----------------|
| 0.007742 | 0.18  | 0.997 | ENSG00000204257 | HLA-DMA      | protein_coding |
| 0.007775 | 0.18  | 0.94  | ENSG00000203880 | PCMTD2       | protein_coding |
| 0.007826 | 0.181 | 1.033 | ENSG00000153250 | RBMS1        | protein_coding |
| 0.007831 | 0.181 | 0.838 | ENSG00000122224 | LY9          | protein_coding |
| 0.007837 | 0.181 | 0.915 | ENSG00000009790 | TRAF3IP3     | protein_coding |
| 0.00789  | 0.182 | 1.21  | ENSG00000183798 | EMILIN3      | protein_coding |
| 0.007898 | 0.182 | 1.126 | ENSG00000248008 | RP11-18C24.6 | antisense      |
| 0.007923 | 0.182 | 1.503 | ENSG00000186615 | KTN1-AS1     | antisense      |
| 0.007958 | 0.182 | 0.954 | ENSG00000007944 | MYLIP        | protein_coding |
| 0.007958 | 0.182 | 1.06  | ENSG00000130720 | FIBCD1       | protein_coding |
| 0.007992 | 0.183 | 1     | ENSG00000019582 | CD74         | protein_coding |
| 0.008041 | 0.183 | 1.063 | ENSG00000114062 | UBE3A        | protein_coding |
| 0.00805  | 0.183 | 1.266 | ENSG00000101746 | NOL4         | protein_coding |
| 0.008058 | 0.183 | 1.004 | ENSG00000142156 | COL6A1       | protein_coding |
| 0.008119 | 0.185 | 0.96  | ENSG00000055163 | CYFIP2       | protein_coding |
| 0.00816  | 0.185 | 1.065 | ENSG00000185989 | RASA3        | protein_coding |
| 0.008206 | 0.186 | 0.785 | ENSG00000172345 | STARD5       | protein_coding |
| 0.008213 | 0.186 | 0.941 | ENSG00000185101 | ANO9         | protein_coding |
| 0.008251 | 0.186 | 1.029 | ENSG00000101557 | USP14        | protein_coding |
| 0.008264 | 0.186 | 1.019 | ENSG00000161714 | PLCD3        | protein_coding |
| 0.008283 | 0.187 | 1.022 | ENSG00000196428 | TSC22D2      | protein_coding |
| 0.008301 | 0.187 | 1.032 | ENSG00000100290 | BIK          | protein_coding |
| 0.008324 | 0.187 | 0.77  | ENSG00000142530 | FAM71E1      | protein_coding |
| 0.008343 | 0.187 | 1.257 | ENSG00000135702 | CHST5        | protein_coding |
| 0.008351 | 0.187 | 1.004 | ENSG00000105974 | CAV1         | protein_coding |
| 0.008394 | 0.188 | 1.011 | ENSG00000134363 | FST          | protein_coding |
| 0.008452 | 0.189 | 1.042 | ENSG00000072571 | HMMR         | protein_coding |
| 0.008478 | 0.189 | 1.029 | ENSG00000113070 | HBEGF        | protein_coding |
| 0.008545 | 0.19  | 1.113 | ENSG00000120322 | PCDHB8       | protein_coding |
| 0.008549 | 0.19  | 1.05  | ENSG00000142867 | BCL10        | protein_coding |
| 0.008631 | 0.192 | 1.062 | ENSG00000185347 | C14orf80     | protein_coding |
| 0.008659 | 0.192 | 1.005 | ENSG00000125740 | FOSB         | protein_coding |
| 0.008694 | 0.192 | 1.058 | ENSG00000105889 | STEAP1B      | protein_coding |
| 0.008717 | 0.193 | 1.036 | ENSG00000092969 | TGFB2        | protein_coding |
| 0.00873  | 0.193 | 1.012 | ENSG00000135919 | SERPINE2     | protein_coding |
| 0.008745 | 0.193 | 1.029 | ENSG00000148773 | MKI67        | protein_coding |

|          |       |       |                 |            |                |
|----------|-------|-------|-----------------|------------|----------------|
| 0.008789 | 0.193 | 1.012 | ENSG00000090006 | LTBP4      | protein_coding |
| 0.008794 | 0.193 | 0.926 | ENSG00000168421 | RHOH       | protein_coding |
| 0.008822 | 0.193 | 0.872 | ENSG00000198863 | RUNDC1     | protein_coding |
| 0.008832 | 0.193 | 1.132 | ENSG00000162723 | SLAMF9     | protein_coding |
| 0.008857 | 0.194 | 1.121 | ENSG00000151233 | GXYLT1     | protein_coding |
| 0.00889  | 0.194 | 1.228 | ENSG00000066382 | MPPED2     | protein_coding |
| 0.008893 | 0.194 | 1.038 | ENSG00000136425 | CIB2       | protein_coding |
| 0.008917 | 0.194 | 1.029 | ENSG00000122958 | VPS26A     | protein_coding |
| 0.00896  | 0.195 | 1.014 | ENSG00000168288 | MMADHC     | protein_coding |
| 0.008962 | 0.195 | 1.037 | ENSG00000176092 | AIM1L      | protein_coding |
| 0.008974 | 0.195 | 1.34  | ENSG00000173068 | BNC2       | protein_coding |
| 0.009005 | 0.195 | 1.008 | ENSG00000126458 | RRAS       | protein_coding |
| 0.009007 | 0.195 | 1.01  | ENSG00000170027 | YWHAG      | protein_coding |
| 0.009011 | 0.195 | 1.069 | ENSG00000104147 | OIP5       | protein_coding |
| 0.009082 | 0.196 | 1.012 | ENSG00000151491 | EPS8       | protein_coding |
| 0.009116 | 0.196 | 1.037 | ENSG00000116761 | CTH        | protein_coding |
| 0.009124 | 0.196 | 1.106 | ENSG00000136122 | BORA       | protein_coding |
| 0.009125 | 0.196 | 1.196 | ENSG00000183876 | ARSI       | protein_coding |
| 0.009163 | 0.196 | 0.962 | ENSG00000067836 | ROGDI      | protein_coding |
| 0.009178 | 0.196 | 0.994 | ENSG00000099622 | CIRBP      | protein_coding |
| 0.009187 | 0.196 | 1.032 | ENSG00000073712 | FERMT2     | protein_coding |
| 0.0092   | 0.196 | 1.026 | ENSG00000158615 | PPP1R15B   | protein_coding |
| 0.009236 | 0.196 | 1.108 | ENSG00000218336 | ODZ3       | protein_coding |
| 0.009241 | 0.196 | 0.88  | ENSG00000153093 | ACOXL      | protein_coding |
| 0.009247 | 0.196 | 1.081 | ENSG00000165983 | PTER       | protein_coding |
| 0.009332 | 0.198 | 0.986 | ENSG00000141556 | TBCD       | protein_coding |
| 0.009332 | 0.198 | 0.983 | ENSG00000090661 | CERS4      | protein_coding |
| 0.009336 | 0.198 | 1.133 | ENSG00000187951 | ARHGAP11B  | protein_coding |
| 0.009351 | 0.198 | 1.057 | ENSG00000242539 | AC007620.3 | antisense      |
| 0.009413 | 0.199 | 1.08  | ENSG00000105245 | NUMBL      | protein_coding |
| 0.009461 | 0.199 | 0.998 | ENSG00000100219 | XBP1       | protein_coding |
| 0.009495 | 0.199 | 1.011 | ENSG00000115129 | TP53I3     | protein_coding |
| 0.009506 | 0.199 | 1.276 | ENSG00000154429 | CCSAP      | protein_coding |
| 0.009527 | 0.199 | 1.007 | ENSG00000168615 | ADAM9      | protein_coding |
| 0.009534 | 0.199 | 1.081 | ENSG00000115355 | CCDC88A    | protein_coding |
| 0.009536 | 0.199 | 0.853 | ENSG00000121807 | CCR2       | protein_coding |

|          |       |       |                 |           |                |
|----------|-------|-------|-----------------|-----------|----------------|
| 0.009551 | 0.199 | 1.074 | ENSG00000144852 | NR1I2     | protein_coding |
| 0.009551 | 0.199 | 1.13  | ENSG00000104626 | ER11      | protein_coding |
| 0.009554 | 0.199 | 1.004 | ENSG00000026297 | RNASET2   | protein_coding |
| 0.009575 | 0.199 | 1.032 | ENSG00000117650 | NEK2      | protein_coding |
| 0.009622 | 0.2   | 0.948 | ENSG00000181392 | SYNE4     | protein_coding |
| 0.009686 | 0.201 | 1.093 | ENSG00000136051 | KIAA1033  | protein_coding |
| 0.009695 | 0.201 | 1.046 | ENSG00000134901 | KDELC1    | protein_coding |
| 0.009728 | 0.201 | 0.943 | ENSG00000166971 | AKTIP     | protein_coding |
| 0.009766 | 0.202 | 1.076 | ENSG00000137261 | KIAA0319  | protein_coding |
| 0.009767 | 0.202 | 1.023 | ENSG00000223414 | LINC00473 | lincRNA        |
| 0.009786 | 0.202 | 1.05  | ENSG00000158290 | CUL4B     | protein_coding |
| 0.009794 | 0.202 | 1.009 | ENSG00000156261 | CCT8      | protein_coding |
| 0.009855 | 0.203 | 1.241 | ENSG00000118655 | DCLRE1B   | protein_coding |
| 0.009916 | 0.203 | 1.102 | ENSG00000085840 | ORC1      | protein_coding |
| 0.009923 | 0.203 | 1.108 | ENSG00000137814 | HAUS2     | protein_coding |
| 0.009953 | 0.203 | 1.113 | ENSG00000170113 | NIPA1     | protein_coding |
| 0.009956 | 0.203 | 1.007 | ENSG00000174437 | ATP2A2    | protein_coding |
| 0.009979 | 0.204 | 1.002 | ENSG00000108518 | PFN1      | protein_coding |
| 0.009992 | 0.204 | 1.016 | ENSG00000065548 | ZC3H15    | protein_coding |
| 0.010014 | 0.204 | 1.022 | ENSG00000013563 | DNASE1L1  | protein_coding |
| 0.010027 | 0.204 | 1.035 | ENSG00000182544 | MFSD5     | protein_coding |
| 0.010032 | 0.204 | 1.035 | ENSG00000175602 | CCDC85B   | protein_coding |
| 0.010053 | 0.204 | 1.012 | ENSG00000113368 | LMNB1     | protein_coding |
| 0.010139 | 0.205 | 1.029 | ENSG00000072501 | SMC1A     | protein_coding |
| 0.010139 | 0.205 | 1.012 | ENSG00000176407 | KCMF1     | protein_coding |
| 0.010159 | 0.205 | 1.14  | ENSG00000151014 | CCRN4L    | protein_coding |
| 0.010167 | 0.205 | 1.035 | ENSG00000197191 | C9orf169  | protein_coding |
| 0.010208 | 0.205 | 0.869 | ENSG00000142920 | ADC       | protein_coding |
| 0.01021  | 0.205 | 1.076 | ENSG00000156162 | DPY19L4   | protein_coding |
| 0.010213 | 0.205 | 1.043 | ENSG00000197045 | GMFB      | protein_coding |
| 0.010257 | 0.206 | 1.045 | ENSG00000101986 | ABCD1     | protein_coding |
| 0.010266 | 0.206 | 1.057 | ENSG00000121931 | LRIF1     | protein_coding |
| 0.010291 | 0.206 | 1.047 | ENSG00000188488 | SERPINA5  | protein_coding |
| 0.0103   | 0.206 | 1.021 | ENSG00000137845 | ADAM10    | protein_coding |
| 0.010351 | 0.206 | 1.035 | ENSG00000117899 | MESDC2    | protein_coding |
| 0.010355 | 0.206 | 1.016 | ENSG00000113083 | LOX       | protein_coding |

|          |       |       |                 |              |                |
|----------|-------|-------|-----------------|--------------|----------------|
| 0.010361 | 0.206 | 1.038 | ENSG00000119616 | FCF1         | protein_coding |
| 0.010361 | 0.206 | 1.029 | ENSG00000182247 | UBE2E2       | protein_coding |
| 0.010414 | 0.206 | 1.072 | ENSG00000243725 | TTC4         | protein_coding |
| 0.010429 | 0.206 | 0.964 | ENSG00000103510 | KAT8         | protein_coding |
| 0.010435 | 0.206 | 1.22  | ENSG00000043355 | ZIC2         | protein_coding |
| 0.010456 | 0.206 | 1.068 | ENSG00000181381 | DDX60L       | protein_coding |
| 0.010462 | 0.206 | 1.177 | ENSG00000120149 | MSX2         | protein_coding |
| 0.01048  | 0.206 | 1.004 | ENSG00000084733 | RAB10        | protein_coding |
| 0.01049  | 0.206 | 1.122 | ENSG00000070778 | PTPN21       | protein_coding |
| 0.010492 | 0.206 | 0.915 | ENSG00000171045 | TSNARE1      | protein_coding |
| 0.010524 | 0.206 | 1.147 | ENSG00000196196 | HRCT1        | protein_coding |
| 0.010524 | 0.206 | 1.05  | ENSG00000143702 | CEP170       | protein_coding |
| 0.010546 | 0.206 | 1.033 | ENSG00000096063 | SRPK1        | protein_coding |
| 0.010579 | 0.207 | 1.047 | ENSG00000113739 | STC2         | protein_coding |
| 0.010609 | 0.207 | 1.166 | ENSG00000102384 | CENPI        | protein_coding |
| 0.010694 | 0.209 | 1.061 | ENSG00000240137 | RP11-103G8.2 | antisense      |
| 0.010753 | 0.209 | 1.012 | ENSG00000179820 | MYADM        | protein_coding |
| 0.010763 | 0.209 | 1.084 | ENSG00000118200 | CAMSAP2      | protein_coding |
| 0.010776 | 0.209 | 1.078 | ENSG00000115942 | ORC2         | protein_coding |
| 0.010783 | 0.209 | 0.976 | ENSG00000165905 | GYLTL1B      | protein_coding |
| 0.010827 | 0.21  | 1.014 | ENSG00000074410 | CA12         | protein_coding |
| 0.010858 | 0.21  | 0.976 | ENSG00000130222 | GADD45G      | protein_coding |
| 0.01087  | 0.21  | 1.002 | ENSG00000132470 | ITGB4        | protein_coding |
| 0.010872 | 0.21  | 1.004 | ENSG00000105048 | TNNT1        | protein_coding |
| 0.010874 | 0.21  | 1.091 | ENSG00000005981 | ASB4         | protein_coding |
| 0.010886 | 0.21  | 1.059 | ENSG00000110218 | PANX1        | protein_coding |
| 0.010956 | 0.21  | 1.335 | ENSG00000137878 | GCOM1        | protein_coding |
| 0.010958 | 0.21  | 1.014 | ENSG00000088325 | TPX2         | protein_coding |
| 0.010975 | 0.21  | 1.015 | ENSG00000049323 | LTBP1        | protein_coding |
| 0.011021 | 0.211 | 0.761 | ENSG00000156345 | CDK20        | protein_coding |
| 0.011041 | 0.211 | 0.661 | ENSG00000100628 | ASB2         | protein_coding |
| 0.011054 | 0.211 | 0.886 | ENSG00000090554 | FLT3LG       | protein_coding |
| 0.011064 | 0.211 | 1.016 | ENSG00000125944 | HNRNPR       | protein_coding |
| 0.011126 | 0.212 | 1.005 | ENSG00000127824 | TUBA4A       | protein_coding |
| 0.011138 | 0.212 | 0.955 | ENSG00000110900 | TSPAN11      | protein_coding |
| 0.011189 | 0.212 | 1.055 | ENSG00000164038 | SLC9B2       | protein_coding |

|          |       |       |                 |          |                |
|----------|-------|-------|-----------------|----------|----------------|
| 0.011192 | 0.212 | 1.024 | ENSG00000158195 | WASF2    | protein_coding |
| 0.011213 | 0.213 | 1.031 | ENSG00000161888 | SPC24    | protein_coding |
| 0.011224 | 0.213 | 1.019 | ENSG00000186591 | UBE2H    | protein_coding |
| 0.011262 | 0.213 | 0.983 | ENSG00000235098 | ANKRD65  | protein_coding |
| 0.011296 | 0.213 | 0.982 | ENSG00000063854 | HAGH     | protein_coding |
| 0.011391 | 0.215 | 0.798 | ENSG00000123411 | IKZF4    | protein_coding |
| 0.011392 | 0.215 | 1.006 | ENSG00000172115 | CYCS     | protein_coding |
| 0.011482 | 0.216 | 1.262 | ENSG00000132953 | XPO4     | protein_coding |
| 0.011532 | 0.217 | 1.056 | ENSG00000152253 | SPC25    | protein_coding |
| 0.011549 | 0.217 | 1.12  | ENSG00000179361 | ARID3B   | protein_coding |
| 0.011557 | 0.217 | 1.189 | ENSG00000183166 | CALN1    | protein_coding |
| 0.011572 | 0.217 | 0.755 | ENSG00000117090 | SLAMF1   | protein_coding |
| 0.011694 | 0.218 | 1.181 | ENSG00000133121 | STARD13  | protein_coding |
| 0.011694 | 0.218 | 1.138 | ENSG00000174327 | SLC16A13 | protein_coding |
| 0.01117  | 0.218 | 1.013 | ENSG00000163362 | C1orf106 | protein_coding |
| 0.011753 | 0.219 | 1.009 | ENSG00000142178 | SIK1     | protein_coding |
| 0.011756 | 0.219 | 1.111 | ENSG00000116874 | WARS2    | protein_coding |
| 0.011807 | 0.219 | 1.033 | ENSG00000100665 | SERPINA4 | protein_coding |
| 0.01182  | 0.219 | 1.013 | ENSG00000176871 | WSB2     | protein_coding |
| 0.011822 | 0.219 | 1.026 | ENSG00000140682 | TGFB111  | protein_coding |
| 0.011918 | 0.22  | 1.065 | ENSG00000104880 | ARHGEF18 | protein_coding |
| 0.011926 | 0.22  | 1.122 | ENSG00000072415 | MPP5     | protein_coding |
| 0.011932 | 0.22  | 1.026 | ENSG00000169851 | PCDH7    | protein_coding |
| 0.011939 | 0.22  | 1.003 | ENSG00000137331 | IER3     | protein_coding |
| 0.011945 | 0.22  | 1.02  | ENSG00000161800 | RACGAP1  | protein_coding |
| 0.011947 | 0.22  | 1.004 | ENSG00000109321 | AREG     | protein_coding |
| 0.011974 | 0.22  | 1.015 | ENSG00000126803 | HSPA2    | protein_coding |
| 0.01204  | 0.221 | 1.013 | ENSG00000133106 | EPST11   | protein_coding |
| 0.012056 | 0.221 | 0.99  | ENSG00000172057 | ORMDL3   | protein_coding |
| 0.012099 | 0.221 | 1.018 | ENSG00000097033 | SH3GLB1  | protein_coding |
| 0.012121 | 0.222 | 0.93  | ENSG00000204178 | TMEM57   | protein_coding |
| 0.012172 | 0.222 | 1.091 | ENSG00000121879 | PIK3CA   | protein_coding |
| 0.012181 | 0.222 | 1.018 | ENSG00000162613 | FUBP1    | protein_coding |
| 0.012197 | 0.222 | 1.032 | ENSG00000188060 | RAB42    | protein_coding |
| 0.012198 | 0.222 | 1.084 | ENSG00000112210 | RAB23    | protein_coding |
| 0.012248 | 0.223 | 1.014 | ENSG00000120756 | PLS1     | protein_coding |



|          |       |       |                 |            |                |
|----------|-------|-------|-----------------|------------|----------------|
| 0.012282 | 0.223 | 1.022 | ENSG00000130340 | SNX9       | protein_coding |
| 0.012319 | 0.223 | 0.704 | ENSG00000107614 | TRDMT1     | protein_coding |
| 0.012335 | 0.223 | 1.019 | ENSG00000170545 | SMAGP      | protein_coding |
| 0.012338 | 0.223 | 1.06  | ENSG00000060140 | STYK1      | protein_coding |
| 0.012343 | 0.223 | 1.079 | ENSG00000198774 | RASSF9     | protein_coding |
| 0.012345 | 0.223 | 1.006 | ENSG00000123999 | INHA       | protein_coding |
| 0.012351 | 0.223 | 0.77  | ENSG00000105662 | CRTC1      | protein_coding |
| 0.012379 | 0.223 | 1.084 | ENSG00000142207 | URB1       | protein_coding |
| 0.012428 | 0.223 | 1.079 | ENSG00000182916 | TCEAL7     | protein_coding |
| 0.012496 | 0.224 | 1.014 | ENSG00000142627 | EPHA2      | protein_coding |
| 0.012526 | 0.225 | 1.006 | ENSG00000143384 | MCL1       | protein_coding |
| 0.012584 | 0.225 | 1.016 | ENSG00000164294 | GPX8       | protein_coding |
| 0.012589 | 0.225 | 1.025 | ENSG00000102471 | NDFIP2     | protein_coding |
| 0.012596 | 0.225 | 1.056 | ENSG00000126391 | FRMD8      | protein_coding |
| 0.01266  | 0.226 | 1.007 | ENSG00000125775 | SDCBP2     | protein_coding |
| 0.012697 | 0.226 | 0.992 | ENSG00000070081 | NUCB2      | protein_coding |
| 0.012702 | 0.226 | 0.96  | ENSG00000160271 | RALGDS     | protein_coding |
| 0.012826 | 0.228 | 1.036 | ENSG00000149503 | INCENP     | protein_coding |
| 0.012914 | 0.229 | 1.012 | ENSG00000182197 | EXT1       | protein_coding |
| 0.012988 | 0.23  | 1.071 | ENSG00000139645 | ANKRD52    | protein_coding |
| 0.012991 | 0.23  | 1.026 | ENSG00000086544 | ITPKC      | protein_coding |
| 0.013055 | 0.231 | 1.137 | ENSG00000137960 | GIPC2      | protein_coding |
| 0.013083 | 0.231 | 0.926 | ENSG00000143772 | ITPKB      | protein_coding |
| 0.01311  | 0.231 | 1.046 | ENSG00000153207 | AHCTF1     | protein_coding |
| 0.013223 | 0.233 | 1.096 | ENSG00000154839 | SKA1       | protein_coding |
| 0.013228 | 0.233 | 1.094 | ENSG00000198252 | STYX       | protein_coding |
| 0.013258 | 0.233 | 1.019 | ENSG00000100439 | ABHD4      | protein_coding |
| 0.013292 | 0.233 | 1.002 | ENSG00000147381 | MAGEA4     | protein_coding |
| 0.013308 | 0.233 | 1.402 | ENSG00000196972 | LINC00087  | lincRNA        |
| 0.013312 | 0.233 | 1.232 | ENSG00000249166 | RP11-1C1.6 | lincRNA        |
| 0.013342 | 0.234 | 1.01  | ENSG00000198732 | SMOC1      | protein_coding |
| 0.013351 | 0.234 | 1.055 | ENSG00000151693 | ASAP2      | protein_coding |
| 0.013372 | 0.234 | 1.019 | ENSG00000111142 | METAP2     | protein_coding |
| 0.013412 | 0.234 | 1.02  | ENSG00000134755 | DSC2       | protein_coding |
| 0.013413 | 0.234 | 1.085 | ENSG00000124782 | RREB1      | protein_coding |
| 0.013419 | 0.234 | 1.108 | ENSG00000011114 | BTBD7      | protein_coding |

|          |       |       |                 |               |                |
|----------|-------|-------|-----------------|---------------|----------------|
| 0.013446 | 0.234 | 1.019 | ENSG00000163655 | GMPS          | protein_coding |
| 0.013448 | 0.234 | 0.979 | ENSG00000092068 | SLC7A8        | protein_coding |
| 0.01361  | 0.236 | 1.003 | ENSG00000142173 | COL6A2        | protein_coding |
| 0.01363  | 0.236 | 1.031 | ENSG00000100603 | SNW1          | protein_coding |
| 0.01363  | 0.236 | 1.025 | ENSG00000114030 | KPNA1         | protein_coding |
| 0.013691 | 0.237 | 0.977 | ENSG00000141510 | TP53          | protein_coding |
| 0.013709 | 0.237 | 0.79  | ENSG00000185133 | INPP5J        | protein_coding |
| 0.013711 | 0.237 | 1.022 | ENSG00000135899 | SP110         | protein_coding |
| 0.013748 | 0.237 | 1.019 | ENSG00000114378 | HYAL1         | protein_coding |
| 0.013788 | 0.237 | 0.97  | ENSG00000147162 | OGT           | protein_coding |
| 0.013852 | 0.238 | 1.078 | ENSG00000119285 | HEATR1        | protein_coding |
| 0.013859 | 0.238 | 1.043 | ENSG00000155189 | AGPAT5        | protein_coding |
| 0.013932 | 0.239 | 1.033 | ENSG00000198829 | SUCNR1        | protein_coding |
| 0.013947 | 0.239 | 1.019 | ENSG00000137500 | CCDC90B       | protein_coding |
| 0.014    | 0.24  | 1.035 | ENSG00000112033 | PPARD         | protein_coding |
| 0.014019 | 0.24  | 1.08  | ENSG00000092470 | WDR76         | protein_coding |
| 0.014059 | 0.24  | 1.007 | ENSG00000179674 | ARL14         | protein_coding |
| 0.014064 | 0.24  | 0.916 | ENSG00000158717 | RNF166        | protein_coding |
| 0.014154 | 0.241 | 1.025 | ENSG00000146670 | CDCA5         | protein_coding |
| 0.014178 | 0.241 | 1.081 | ENSG00000249550 | RP11-438N16.1 | lincRNA        |
| 0.014181 | 0.241 | 1.008 | ENSG00000164611 | PTTG1         | protein_coding |
| 0.014209 | 0.241 | 1.177 | ENSG00000184838 | PRR16         | protein_coding |
| 0.014244 | 0.242 | 1     | ENSG00000115414 | FN1           | protein_coding |
| 0.01433  | 0.243 | 0.942 | ENSG00000172071 | EIF2AK3       | protein_coding |
| 0.014344 | 0.243 | 1.171 | ENSG00000151090 | THRB          | protein_coding |
| 0.014387 | 0.243 | 1.007 | ENSG00000124466 | LYPD3         | protein_coding |
| 0.014401 | 0.243 | 1.015 | ENSG00000099942 | CRKL          | protein_coding |
| 0.014402 | 0.243 | 0.996 | ENSG00000242574 | HLA-DMB       | protein_coding |
| 0.014474 | 0.244 | 1.158 | ENSG00000060749 | QSER1         | protein_coding |
| 0.014535 | 0.244 | 1.039 | ENSG00000157600 | TMEM164       | protein_coding |
| 0.014547 | 0.244 | 1.021 | ENSG00000130779 | CLIP1         | protein_coding |
| 0.014556 | 0.244 | 1.015 | ENSG00000134668 | SPOCD1        | protein_coding |
| 0.014596 | 0.245 | 1.039 | ENSG00000197265 | GTF2E2        | protein_coding |
| 0.014607 | 0.245 | 1.009 | ENSG00000205364 | MT1M          | protein_coding |
| 0.014621 | 0.245 | 1.193 | ENSG00000134987 | WDR36         | protein_coding |
| 0.014676 | 0.245 | 0.867 | ENSG00000115085 | ZAP70         | protein_coding |

|          |       |       |                 |           |                |
|----------|-------|-------|-----------------|-----------|----------------|
| 0.014702 | 0.245 | 1.101 | ENSG00000135341 | MAP3K7    | protein_coding |
| 0.01472  | 0.245 | 1.025 | ENSG00000117505 | DR1       | protein_coding |
| 0.014724 | 0.245 | 1.041 | ENSG00000043093 | DCUN1D1   | protein_coding |
| 0.014827 | 0.246 | 0.923 | ENSG00000242259 | C22orf39  | protein_coding |
| 0.014833 | 0.246 | 0.928 | ENSG00000238083 | LRRC37A2  | protein_coding |
| 0.01487  | 0.247 | 1.147 | ENSG00000111647 | UHRF1BP1L | protein_coding |
| 0.014888 | 0.247 | 0.956 | ENSG00000182272 | B4GALNT4  | protein_coding |
| 0.014899 | 0.247 | 1.097 | ENSG00000176697 | BDNF      | protein_coding |
| 0.014931 | 0.247 | 0.944 | ENSG00000172349 | IL16      | protein_coding |
| 0.01498  | 0.247 | 1.089 | ENSG00000150990 | DHX37     | protein_coding |
| 0.014983 | 0.247 | 1.016 | ENSG00000073008 | PVR       | protein_coding |
| 0.014986 | 0.247 | 1.016 | ENSG00000100605 | ITPK1     | protein_coding |
| 0.015013 | 0.247 | 1.155 | ENSG00000005108 | THSD7A    | protein_coding |
| 0.01511  | 0.248 | 1.01  | ENSG00000119318 | RAD23B    | protein_coding |
| 0.01512  | 0.248 | 1.027 | ENSG00000109685 | WHSC1     | protein_coding |
| 0.015172 | 0.249 | 0.928 | ENSG00000215256 | DHRS4-AS1 | antisense      |
| 0.015182 | 0.249 | 0.97  | ENSG00000111452 | GPR133    | protein_coding |
| 0.015267 | 0.25  | 1.01  | ENSG00000138119 | MYOF      | protein_coding |
| 0.015269 | 0.25  | 1.039 | ENSG00000177311 | ZBTB38    | protein_coding |
| 0.015289 | 0.25  | 1.004 | ENSG00000149100 | EIF3M     | protein_coding |
| 0.015302 | 0.25  | 1.038 | ENSG00000165304 | MELK      | protein_coding |
| 0.015367 | 0.251 | 1.03  | ENSG00000142945 | KIF2C     | protein_coding |
| 0.01543  | 0.251 | 0.868 | ENSG00000160654 | CD3G      | protein_coding |
| 0.01546  | 0.251 | 1.125 | ENSG00000129810 | SGOL1     | protein_coding |
| 0.015468 | 0.251 | 1.013 | ENSG00000188761 | BCL2L15   | protein_coding |
| 0.01553  | 0.252 | 1.046 | ENSG00000115368 | WDR75     | protein_coding |
| 0.015535 | 0.252 | 0.787 | ENSG00000144191 | CNGA3     | protein_coding |
| 0.015552 | 0.252 | 1.018 | ENSG00000099917 | MED15     | protein_coding |
| 0.015557 | 0.252 | 1.042 | ENSG00000153317 | ASAP1     | protein_coding |
| 0.015599 | 0.252 | 1.006 | ENSG00000078369 | GNB1      | protein_coding |
| 0.015627 | 0.252 | 1.016 | ENSG00000154473 | BUB3      | protein_coding |
| 0.015646 | 0.252 | 1.103 | ENSG00000136141 | LRCH1     | protein_coding |
| 0.015651 | 0.252 | 1.019 | ENSG00000127947 | PTPN12    | protein_coding |
| 0.01568  | 0.252 | 0.966 | ENSG00000116824 | CD2       | protein_coding |
| 0.015687 | 0.252 | 1.092 | ENSG00000083520 | DIS3      | protein_coding |
| 0.015697 | 0.252 | 1.093 | ENSG00000166341 | DCHS1     | protein_coding |

|          |       |       |                 |              |                |
|----------|-------|-------|-----------------|--------------|----------------|
| 0.015705 | 0.252 | 1.036 | ENSG00000089060 | SLC24A6      | protein_coding |
| 0.015724 | 0.252 | 0.872 | ENSG00000110448 | CD5          | protein_coding |
| 0.015757 | 0.252 | 1.113 | ENSG00000106689 | LHX2         | protein_coding |
| 0.015811 | 0.253 | 0.939 | ENSG00000146555 | SDK1         | protein_coding |
| 0.015872 | 0.254 | 1.112 | ENSG00000129173 | E2F8         | protein_coding |
| 0.015928 | 0.254 | 0.887 | ENSG00000111796 | KLRB1        | protein_coding |
| 0.016    | 0.255 | 0.982 | ENSG00000233016 | SNHG7        | antisense      |
| 0.016013 | 0.255 | 1.095 | ENSG00000169994 | MYO7B        | protein_coding |
| 0.016016 | 0.255 | 1.019 | ENSG00000125977 | EIF2S2       | protein_coding |
| 0.016028 | 0.255 | 0.986 | ENSG00000147535 | PPAPDC1B     | protein_coding |
| 0.016153 | 0.256 | 1.113 | ENSG00000234616 | JRK          | protein_coding |
| 0.016181 | 0.257 | 1.057 | ENSG00000136824 | SMC2         | protein_coding |
| 0.016205 | 0.257 | 1.038 | ENSG00000141644 | MBD1         | protein_coding |
| 0.016217 | 0.257 | 1.027 | ENSG00000030110 | BAK1         | protein_coding |
| 0.016232 | 0.257 | 1.005 | ENSG00000158825 | CDA          | protein_coding |
| 0.016267 | 0.257 | 1.005 | ENSG00000167772 | ANGPTL4      | protein_coding |
| 0.016317 | 0.257 | 1.057 | ENSG00000174899 | C3orf55      | protein_coding |
| 0.016349 | 0.257 | 1.12  | ENSG00000159267 | HLCS         | protein_coding |
| 0.016353 | 0.257 | 1.048 | ENSG00000101076 | HNF4A        | protein_coding |
| 0.016421 | 0.258 | 1.04  | ENSG00000168078 | PBK          | protein_coding |
| 0.016431 | 0.258 | 1.025 | ENSG00000117620 | SLC35A3      | protein_coding |
| 0.016439 | 0.258 | 1.027 | ENSG00000196781 | TLE1         | protein_coding |
| 0.016502 | 0.259 | 0.993 | ENSG00000177508 | IRX3         | protein_coding |
| 0.016536 | 0.259 | 1.011 | ENSG00000096746 | HNRNPH3      | protein_coding |
| 0.016542 | 0.259 | 1.027 | ENSG00000070214 | SLC44A1      | protein_coding |
| 0.016555 | 0.259 | 1.011 | ENSG00000116871 | MAP7D1       | protein_coding |
| 0.016566 | 0.259 | 1.129 | ENSG00000072041 | SLC6A15      | protein_coding |
| 0.016625 | 0.259 | 0.952 | ENSG00000115902 | SLC1A4       | protein_coding |
| 0.016729 | 0.26  | 0.98  | ENSG00000185187 | SIGIRR       | protein_coding |
| 0.016736 | 0.26  | 1.168 | ENSG00000183814 | LIN9         | protein_coding |
| 0.016793 | 0.261 | 1.02  | ENSG00000077380 | DYNC1I2      | protein_coding |
| 0.016826 | 0.261 | 1.11  | ENSG00000120688 | WBP4         | protein_coding |
| 0.016845 | 0.261 | 1.071 | ENSG00000119041 | GTF3C3       | protein_coding |
| 0.01687  | 0.261 | 1.015 | ENSG00000137959 | IFI44L       | protein_coding |
| 0.016882 | 0.261 | 1.097 | ENSG00000229967 | RP11-366F6.2 | antisense      |
| 0.016945 | 0.262 | 1.121 | ENSG00000182585 | EPGN         | protein_coding |

|          |       |       |                 |               |                |
|----------|-------|-------|-----------------|---------------|----------------|
| 0.016952 | 0.262 | 1.004 | ENSG00000184007 | PTP4A2        | protein_coding |
| 0.016974 | 0.262 | 1.003 | ENSG00000001084 | GCLC          | protein_coding |
| 0.016993 | 0.262 | 1.028 | ENSG00000160214 | RRP1          | protein_coding |
| 0.017014 | 0.262 | 0.944 | ENSG00000162755 | KLHDC9        | protein_coding |
| 0.0171   | 0.263 | 1.011 | ENSG00000173852 | DPY19L1       | protein_coding |
| 0.017113 | 0.263 | 0.895 | ENSG00000013725 | CD6           | protein_coding |
| 0.01716  | 0.263 | 1.014 | ENSG00000203760 | CENPW         | protein_coding |
| 0.017179 | 0.263 | 1.081 | ENSG00000165556 | CDX2          | protein_coding |
| 0.017235 | 0.264 | 0.973 | ENSG00000129158 | SERGEF        | protein_coding |
| 0.017293 | 0.264 | 1.136 | ENSG00000180488 | FAM73A        | protein_coding |
| 0.017312 | 0.264 | 1.089 | ENSG00000163507 | KIAA1524      | protein_coding |
| 0.017358 | 0.264 | 1.008 | ENSG00000135318 | NT5E          | protein_coding |
| 0.017385 | 0.264 | 1.04  | ENSG00000082701 | GSK3B         | protein_coding |
| 0.017406 | 0.264 | 1.286 | ENSG00000150672 | DLG2          | protein_coding |
| 0.017409 | 0.264 | 1.049 | ENSG00000153936 | HS2ST1        | protein_coding |
| 0.017411 | 0.264 | 0.945 | ENSG00000241106 | HLA-DOB       | protein_coding |
| 0.017415 | 0.264 | 0.957 | ENSG00000147364 | FBXO25        | protein_coding |
| 0.017429 | 0.264 | 1.03  | ENSG00000147854 | UHRF2         | protein_coding |
| 0.017443 | 0.264 | 1.229 | ENSG00000151422 | FER           | protein_coding |
| 0.017454 | 0.264 | 1.075 | ENSG00000169607 | CKAP2L        | protein_coding |
| 0.017468 | 0.264 | 0.856 | ENSG00000181896 | ZNF101        | protein_coding |
| 0.017479 | 0.264 | 1.001 | ENSG00000213719 | CLIC1         | protein_coding |
| 0.017537 | 0.265 | 0.778 | ENSG00000225742 | RP11-513G11.4 | lincRNA        |
| 0.017565 | 0.265 | 1.023 | ENSG00000166503 | RP11-382A20.3 | protein_coding |
| 0.017568 | 0.265 | 1.193 | ENSG00000139618 | BRCA2         | protein_coding |
| 0.017607 | 0.265 | 1.041 | ENSG00000106078 | COBL          | protein_coding |
| 0.017642 | 0.265 | 1.007 | ENSG00000145920 | CPLX2         | protein_coding |
| 0.017677 | 0.265 | 1.021 | ENSG00000113575 | PPP2CA        | protein_coding |
| 0.017717 | 0.265 | 0.935 | ENSG00000139508 | SLC46A3       | protein_coding |
| 0.017732 | 0.265 | 0.85  | ENSG00000240005 | RP11-293A21.1 | antisense      |
| 0.017752 | 0.265 | 1.001 | ENSG00000125730 | C3            | protein_coding |
| 0.017767 | 0.265 | 1.06  | ENSG00000248323 | RP11-213H15.3 | lincRNA        |
| 0.01779  | 0.265 | 1.167 | ENSG00000177374 | HIC1          | protein_coding |
| 0.017791 | 0.265 | 1.055 | ENSG00000148841 | ITPRIP        | protein_coding |
| 0.017791 | 0.265 | 1.008 | ENSG00000168243 | GNG4          | protein_coding |
| 0.01781  | 0.265 | 1.135 | ENSG00000196639 | HRH1          | protein_coding |

|          |       |       |                 |              |                |
|----------|-------|-------|-----------------|--------------|----------------|
| 0.017818 | 0.265 | 1.097 | ENSG00000138246 | DNAJC13      | protein_coding |
| 0.017859 | 0.265 | 0.985 | ENSG00000154589 | LY96         | protein_coding |
| 0.017862 | 0.265 | 1.089 | ENSG00000157350 | ST3GAL2      | protein_coding |
| 0.017898 | 0.266 | 0.83  | ENSG00000198208 | RPS6KL1      | protein_coding |
| 0.017926 | 0.266 | 1.044 | ENSG00000124789 | NUP153       | protein_coding |
| 0.017928 | 0.266 | 0.962 | ENSG00000119729 | RHOQ         | protein_coding |
| 0.017949 | 0.266 | 1.026 | ENSG00000163734 | CXCL3        | protein_coding |
| 0.017995 | 0.266 | 1.082 | ENSG00000162779 | AXDND1       | protein_coding |
| 0.018058 | 0.267 | 0.934 | ENSG00000106948 | AKNA         | protein_coding |
| 0.018121 | 0.267 | 1.154 | ENSG00000227053 | RP11-395B7.4 | antisense      |
| 0.018178 | 0.267 | 0.918 | ENSG00000135063 | FAM189A2     | protein_coding |
| 0.018183 | 0.267 | 0.857 | ENSG00000187486 | KCNJ11       | protein_coding |
| 0.018187 | 0.267 | 1.029 | ENSG00000244509 | APOBEC3C     | protein_coding |
| 0.018188 | 0.267 | 1.008 | ENSG00000124942 | AHNAK        | protein_coding |
| 0.018253 | 0.268 | 1.223 | ENSG00000140534 | TICRR        | protein_coding |
| 0.018329 | 0.269 | 0.919 | ENSG00000183044 | ABAT         | protein_coding |
| 0.018332 | 0.269 | 1.178 | ENSG00000197565 | COL4A6       | protein_coding |
| 0.01837  | 0.269 | 1.167 | ENSG00000102349 | KLF8         | protein_coding |
| 0.01846  | 0.27  | 1.027 | ENSG00000110172 | CHORDC1      | protein_coding |
| 0.018475 | 0.27  | 1.018 | ENSG00000100304 | TTLL12       | protein_coding |
| 0.018579 | 0.271 | 1.01  | ENSG00000104738 | MCM4         | protein_coding |
| 0.018642 | 0.271 | 1.001 | ENSG00000167553 | TUBA1C       | protein_coding |
| 0.018652 | 0.271 | 1.006 | ENSG00000046604 | DSG2         | protein_coding |
| 0.018662 | 0.271 | 1.578 | ENSG00000225826 | LINC00626    | lincRNA        |
| 0.018665 | 0.271 | 0.954 | ENSG00000179144 | GIMAP7       | protein_coding |
| 0.018722 | 0.272 | 0.986 | ENSG00000121073 | SLC35B1      | protein_coding |
| 0.018756 | 0.272 | 1.049 | ENSG00000146476 | C6orf211     | protein_coding |
| 0.018791 | 0.273 | 0.969 | ENSG00000205629 | LCMT1        | protein_coding |
| 0.0189   | 0.274 | 1.088 | ENSG00000113790 | EHHADH       | protein_coding |
| 0.019    | 0.275 | 1.159 | ENSG00000146263 | MMS22L       | protein_coding |
| 0.019007 | 0.275 | 1.028 | ENSG00000108039 | XPNPEP1      | protein_coding |
| 0.019022 | 0.275 | 1.067 | ENSG00000137770 | CTDSPL2      | protein_coding |
| 0.019028 | 0.275 | 1.084 | ENSG00000241697 | TMEFF1       | protein_coding |
| 0.019054 | 0.275 | 1.011 | ENSG00000197766 | CFD          | protein_coding |
| 0.019141 | 0.276 | 1.065 | ENSG00000110025 | SNX15        | protein_coding |
| 0.019217 | 0.277 | 1.089 | ENSG00000126970 | ZC4H2        | protein_coding |

|          |       |       |                 |            |                |
|----------|-------|-------|-----------------|------------|----------------|
| 0.019244 | 0.277 | 1.02  | ENSG00000023228 | NDUFS1     | protein_coding |
| 0.019272 | 0.277 | 0.943 | ENSG00000182134 | TDRKH      | protein_coding |
| 0.019295 | 0.277 | 0.981 | ENSG00000167861 | C17orf28   | protein_coding |
| 0.019317 | 0.277 | 0.92  | ENSG00000105607 | GCDH       | protein_coding |
| 0.019363 | 0.277 | 1.006 | ENSG00000213977 | TAX1BP3    | protein_coding |
| 0.019375 | 0.277 | 1.075 | ENSG00000162614 | NEXN       | protein_coding |
| 0.01941  | 0.277 | 1.004 | ENSG00000168528 | SERINC2    | protein_coding |
| 0.019448 | 0.278 | 1.204 | ENSG00000162419 | GMEB1      | protein_coding |
| 0.019477 | 0.278 | 1.004 | ENSG00000182240 | BACE2      | protein_coding |
| 0.019517 | 0.278 | 1.011 | ENSG00000232220 | AC008440.5 | antisense      |
| 0.019569 | 0.279 | 0.931 | ENSG00000072818 | ACAP1      | protein_coding |
| 0.019712 | 0.28  | 1.031 | ENSG00000079950 | STX7       | protein_coding |
| 0.019791 | 0.281 | 1.012 | ENSG00000132170 | PPARG      | protein_coding |
| 0.019805 | 0.281 | 0.947 | ENSG00000015133 | CCDC88C    | protein_coding |
| 0.019825 | 0.281 | 1.026 | ENSG00000183963 | SMTN       | protein_coding |
| 0.019875 | 0.282 | 1.023 | ENSG00000144959 | NCEH1      | protein_coding |
| 0.019888 | 0.282 | 1.04  | ENSG00000100246 | DNAL4      | protein_coding |
| 0.01992  | 0.282 | 1.021 | ENSG00000143850 | PLEKHA6    | protein_coding |
| 0.020013 | 0.283 | 0.966 | ENSG00000136720 | HS6ST1     | protein_coding |
| 0.020042 | 0.283 | 0.98  | ENSG00000171307 | ZDHHC16    | protein_coding |
| 0.020044 | 0.283 | 1.024 | ENSG00000090924 | PLEKHG2    | protein_coding |
| 0.020062 | 0.283 | 1.017 | ENSG00000177879 | AP3S1      | protein_coding |
| 0.020106 | 0.283 | 1.06  | ENSG00000166477 | LEO1       | protein_coding |
| 0.020147 | 0.283 | 1.017 | ENSG00000138600 | SPPL2A     | protein_coding |
| 0.020226 | 0.284 | 1.042 | ENSG00000070367 | EXOC5      | protein_coding |
| 0.02026  | 0.284 | 1.036 | ENSG00000074356 | C17orf85   | protein_coding |
| 0.020343 | 0.285 | 1.011 | ENSG00000224063 | AC007319.1 | antisense      |
| 0.020386 | 0.286 | 1.088 | ENSG00000183137 | CEP57L1    | protein_coding |
| 0.020479 | 0.287 | 1.013 | ENSG00000151914 | DST        | protein_coding |
| 0.020535 | 0.287 | 0.807 | ENSG00000174951 | FUT1       | protein_coding |
| 0.020603 | 0.288 | 1.021 | ENSG00000132031 | MATN3      | protein_coding |
| 0.020644 | 0.288 | 1.034 | ENSG00000119541 | VPS4B      | protein_coding |
| 0.020652 | 0.288 | 0.996 | ENSG00000161798 | AQP5       | protein_coding |
| 0.020674 | 0.288 | 1.067 | ENSG00000166073 | GPR176     | protein_coding |
| 0.020715 | 0.288 | 1.004 | ENSG00000114867 | EIF4G1     | protein_coding |
| 0.020774 | 0.289 | 0.973 | ENSG00000144749 | LRIG1      | protein_coding |

|          |       |       |                 |              |                |
|----------|-------|-------|-----------------|--------------|----------------|
| 0.02082  | 0.289 | 1.027 | ENSG00000167196 | FBXO22       | protein_coding |
| 0.020871 | 0.29  | 1.037 | ENSG00000158315 | RHBDL2       | protein_coding |
| 0.020923 | 0.29  | 1.029 | ENSG00000167080 | B4GALNT2     | protein_coding |
| 0.020923 | 0.29  | 1.036 | ENSG00000174469 | CNTNAP2      | protein_coding |
| 0.020964 | 0.29  | 1.026 | ENSG00000137831 | UACA         | protein_coding |
| 0.021069 | 0.291 | 1.06  | ENSG00000129951 | hsa-mir-3187 | protein_coding |
| 0.021076 | 0.291 | 0.878 | ENSG00000180535 | BHLHA15      | protein_coding |
| 0.021086 | 0.291 | 0.99  | ENSG00000182551 | ADI1         | protein_coding |
| 0.021102 | 0.291 | 1.174 | ENSG00000205060 | SLC35B4      | protein_coding |
| 0.021123 | 0.291 | 1.01  | ENSG00000013810 | TACC3        | protein_coding |
| 0.021204 | 0.292 | 1.074 | ENSG00000033178 | UBA6         | protein_coding |
| 0.021257 | 0.292 | 1.02  | ENSG00000135127 | CCDC64       | protein_coding |
| 0.021321 | 0.293 | 1.016 | ENSG00000180628 | PCGF5        | protein_coding |
| 0.02133  | 0.293 | 1.008 | ENSG00000134240 | HMGCS2       | protein_coding |
| 0.021381 | 0.293 | 1.003 | ENSG00000115053 | NCL          | protein_coding |
| 0.021418 | 0.293 | 0.977 | ENSG00000121057 | AKAP1        | protein_coding |
| 0.021427 | 0.293 | 0.84  | ENSG00000181035 | SLC25A42     | protein_coding |
| 0.021451 | 0.293 | 1.088 | ENSG00000118263 | KLF7         | protein_coding |
| 0.021496 | 0.294 | 1.01  | ENSG00000100664 | EIF5         | protein_coding |
| 0.021641 | 0.295 | 1.033 | ENSG00000169679 | BUB1         | protein_coding |
| 0.021656 | 0.295 | 1.04  | ENSG00000163638 | ADAMTS9      | protein_coding |
| 0.021676 | 0.295 | 1.107 | ENSG00000080345 | RIF1         | protein_coding |
| 0.02171  | 0.296 | 1.098 | ENSG00000169641 | LUZP1        | protein_coding |
| 0.021727 | 0.296 | 1.039 | ENSG00000144824 | PHLDB2       | protein_coding |
| 0.021782 | 0.296 | 1.022 | ENSG00000178718 | RPP25        | protein_coding |
| 0.021792 | 0.296 | 1.016 | ENSG00000137804 | NUSAP1       | protein_coding |
| 0.021809 | 0.296 | 1.016 | ENSG00000100401 | RANGAP1      | protein_coding |
| 0.021824 | 0.296 | 1.006 | ENSG00000122176 | FMOD         | protein_coding |
| 0.021857 | 0.296 | 0.916 | ENSG00000181045 | SLC26A11     | protein_coding |
| 0.021865 | 0.296 | 0.612 | ENSG00000132932 | ATP8A2       | protein_coding |
| 0.021923 | 0.296 | 0.927 | ENSG00000167476 | JSRP1        | protein_coding |
| 0.021961 | 0.296 | 1.024 | ENSG00000100934 | SEC23A       | protein_coding |
| 0.021969 | 0.296 | 0.918 | ENSG00000124508 | BTN2A2       | protein_coding |
| 0.022088 | 0.298 | 1.033 | ENSG00000177425 | PAWR         | protein_coding |
| 0.022126 | 0.298 | 0.905 | ENSG00000204175 | GPRIN2       | protein_coding |
| 0.022146 | 0.298 | 1.086 | ENSG00000155099 | TMEM55A      | protein_coding |



|          |       |       |                 |                |                |
|----------|-------|-------|-----------------|----------------|----------------|
| 0.02218  | 0.298 | 0.857 | ENSG00000135472 | FAIM2          | protein_coding |
| 0.022187 | 0.298 | 0.96  | ENSG00000088899 | RP5-1187M17.10 | protein_coding |
| 0.022273 | 0.299 | 0.956 | ENSG00000182108 | DEXI           | protein_coding |
| 0.022339 | 0.3   | 1.06  | ENSG00000125657 | TNFSF9         | protein_coding |
| 0.022387 | 0.3   | 1.003 | ENSG00000002586 | CD99           | protein_coding |
| 0.022391 | 0.3   | 0.934 | ENSG00000048462 | TNFRSF17       | protein_coding |
| 0.022413 | 0.3   | 0.785 | ENSG00000163599 | CTLA4          | protein_coding |
| 0.02244  | 0.3   | 1.045 | ENSG00000162702 | ZNF281         | protein_coding |
| 0.022452 | 0.3   | 0.861 | ENSG00000163644 | PPM1K          | protein_coding |
| 0.02253  | 0.3   | 1.049 | ENSG00000165650 | PDZD8          | protein_coding |
| 0.022566 | 0.301 | 1.016 | ENSG00000213625 | LEPROT         | protein_coding |
| 0.022718 | 0.302 | 1.063 | ENSG00000112742 | TTK            | protein_coding |
| 0.022723 | 0.302 | 1     | ENSG00000133636 | NTS            | protein_coding |
| 0.02273  | 0.302 | 0.892 | ENSG00000011132 | APBA3          | protein_coding |
| 0.022758 | 0.302 | 1.146 | ENSG00000147655 | RSPO2          | protein_coding |
| 0.02277  | 0.302 | 1.029 | ENSG00000133104 | SPG20          | protein_coding |
| 0.022851 | 0.303 | 1.058 | ENSG00000006555 | TTC22          | protein_coding |
| 0.022911 | 0.303 | 1.013 | ENSG00000001036 | FUCA2          | protein_coding |
| 0.022929 | 0.303 | 0.533 | ENSG00000162630 | B3GALT2        | protein_coding |
| 0.023063 | 0.305 | 1.024 | ENSG00000139163 | ETNK1          | protein_coding |
| 0.023066 | 0.305 | 1.025 | ENSG00000139726 | DENR           | protein_coding |
| 0.023101 | 0.305 | 0.965 | ENSG00000143390 | RFX5           | protein_coding |
| 0.023118 | 0.305 | 1.077 | ENSG00000120539 | MASTL          | protein_coding |
| 0.023163 | 0.305 | 1.003 | ENSG00000183255 | PTTG1IP        | protein_coding |
| 0.023174 | 0.305 | 1.009 | ENSG00000115339 | GALNT3         | protein_coding |
| 0.023261 | 0.306 | 1.153 | ENSG00000164520 | RAET1E         | protein_coding |
| 0.023419 | 0.308 | 0.937 | ENSG00000158050 | DUSP2          | protein_coding |
| 0.023482 | 0.308 | 1.21  | ENSG00000131650 | KREMEN2        | protein_coding |
| 0.023518 | 0.308 | 1.025 | ENSG00000122641 | INHBA          | protein_coding |
| 0.023544 | 0.308 | 0.919 | ENSG00000187325 | TAF9B          | protein_coding |
| 0.023562 | 0.308 | 1.019 | ENSG00000196504 | PRPF40A        | protein_coding |
| 0.02359  | 0.308 | 1.045 | ENSG00000139117 | CPNE8          | protein_coding |
| 0.023599 | 0.308 | 0.964 | ENSG00000163521 | GLB1L          | protein_coding |
| 0.023607 | 0.308 | 1.228 | ENSG00000234787 | LINC00458      | lincRNA        |
| 0.02364  | 0.308 | 1.001 | ENSG00000146674 | IGFBP3         | protein_coding |
| 0.023643 | 0.308 | 0.978 | ENSG00000114737 | CISH           | protein_coding |

|          |       |       |                 |               |                |
|----------|-------|-------|-----------------|---------------|----------------|
| 0.02366  | 0.308 | 1.829 | ENSG00000230648 | RP3-406P24.3  | antisense      |
| 0.023668 | 0.308 | 1.015 | ENSG00000130309 | GLT25D1       | protein_coding |
| 0.023678 | 0.308 | 1.018 | ENSG00000198087 | CD2AP         | protein_coding |
| 0.023685 | 0.308 | 1.026 | ENSG00000196369 | SRGAP2B       | protein_coding |
| 0.023729 | 0.308 | 1.02  | ENSG00000145431 | PDGFC         | protein_coding |
| 0.023745 | 0.308 | 0.937 | ENSG00000183248 | AC010336.1    | protein_coding |
| 0.023793 | 0.308 | 0.954 | ENSG00000164929 | BAALC         | protein_coding |
| 0.024029 | 0.311 | 0.972 | ENSG00000128928 | IVD           | protein_coding |
| 0.024088 | 0.312 | 1.133 | ENSG00000118496 | FBXO30        | protein_coding |
| 0.024111 | 0.312 | 1.023 | ENSG00000101384 | JAG1          | protein_coding |
| 0.024141 | 0.312 | 1.091 | ENSG00000074603 | DPP8          | protein_coding |
| 0.024291 | 0.313 | 1.035 | ENSG00000085491 | SLC25A24      | protein_coding |
| 0.024326 | 0.314 | 1.052 | ENSG00000153086 | ACMSD         | protein_coding |
| 0.024434 | 0.315 | 1.019 | ENSG00000115602 | IL1RL1        | protein_coding |
| 0.024473 | 0.315 | 0.919 | ENSG00000213096 | ZNF254        | protein_coding |
| 0.024503 | 0.315 | 1.134 | ENSG00000169432 | SCN9A         | protein_coding |
| 0.024507 | 0.315 | 1.01  | ENSG00000162174 | ASRGL1        | protein_coding |
| 0.024609 | 0.316 | 0.988 | ENSG00000178927 | C17orf62      | protein_coding |
| 0.024678 | 0.316 | 0.968 | ENSG00000196189 | SEMA4A        | protein_coding |
| 0.024698 | 0.316 | 1.002 | ENSG00000123689 | G0S2          | protein_coding |
| 0.02472  | 0.316 | 1.029 | ENSG00000102753 | KPNA3         | protein_coding |
| 0.02473  | 0.316 | 0.969 | ENSG00000137266 | SLC22A23      | protein_coding |
| 0.024781 | 0.317 | 1.041 | ENSG00000073614 | KDM5A         | protein_coding |
| 0.024808 | 0.317 | 0.983 | ENSG00000163879 | DNALI1        | protein_coding |
| 0.024853 | 0.317 | 1.082 | ENSG00000204055 | RP11-247A12.2 | antisense      |
| 0.024855 | 0.317 | 1.017 | ENSG00000151247 | EIF4E         | protein_coding |
| 0.024878 | 0.317 | 1.017 | ENSG00000136802 | LRRC8A        | protein_coding |
| 0.024946 | 0.317 | 1     | ENSG00000149925 | ALDOA         | protein_coding |
| 0.024993 | 0.317 | 0.976 | ENSG00000131370 | SH3BP5        | protein_coding |
| 0.024995 | 0.317 | 0.89  | ENSG00000128594 | LRRC4         | protein_coding |
| 0.025002 | 0.317 | 1.041 | ENSG00000173546 | CSPG4         | protein_coding |
| 0.025014 | 0.317 | 0.965 | ENSG00000088808 | PPP1R13B      | protein_coding |
| 0.025049 | 0.317 | 1.095 | ENSG00000196550 | FAM72A        | protein_coding |
| 0.025082 | 0.318 | 0.858 | ENSG00000186787 | SPIN2B        | protein_coding |
| 0.025108 | 0.318 | 1.042 | ENSG00000170385 | SLC30A1       | protein_coding |
| 0.025127 | 0.318 | 0.856 | ENSG00000136925 | TSTD2         | protein_coding |

|          |       |       |                 |          |                |
|----------|-------|-------|-----------------|----------|----------------|
| 0.025169 | 0.318 | 1.001 | ENSG00000140564 | FURIN    | protein_coding |
| 0.025177 | 0.318 | 0.965 | ENSG00000180448 | HMHA1    | protein_coding |
| 0.025222 | 0.318 | 0.999 | ENSG00000231389 | HLA-DPA1 | protein_coding |
| 0.025271 | 0.318 | 1.025 | ENSG00000165996 | PTPLA    | protein_coding |
| 0.025304 | 0.318 | 1.032 | ENSG00000188677 | PARVB    | protein_coding |
| 0.025316 | 0.318 | 1.032 | ENSG00000168884 | TNIP2    | protein_coding |
| 0.025356 | 0.319 | 1.01  | ENSG00000142327 | RNPEPL1  | protein_coding |
| 0.025429 | 0.319 | 1.049 | ENSG00000059728 | MXD1     | protein_coding |
| 0.025434 | 0.319 | 0.961 | ENSG00000121067 | SPOP     | protein_coding |
| 0.02544  | 0.319 | 0.878 | ENSG00000179023 | KLHDC7A  | protein_coding |
| 0.025472 | 0.319 | 1.131 | ENSG00000155330 | C16orf87 | protein_coding |
| 0.025558 | 0.32  | 1.009 | ENSG00000111802 | TDP2     | protein_coding |
| 0.025605 | 0.32  | 0.992 | ENSG00000099958 | DERL3    | protein_coding |
| 0.025636 | 0.32  | 1.181 | ENSG00000163590 | PPM1L    | protein_coding |
| 0.025701 | 0.32  | 0.947 | ENSG00000086619 | ERO1LB   | protein_coding |
| 0.025707 | 0.32  | 1.074 | ENSG00000112039 | FANCE    | protein_coding |
| 0.025714 | 0.32  | 1.083 | ENSG00000121964 | GTDC1    | protein_coding |
| 0.025814 | 0.32  | 1.018 | ENSG00000117724 | CENPF    | protein_coding |
| 0.025815 | 0.32  | 1.018 | ENSG00000163558 | PRKCI    | protein_coding |
| 0.025831 | 0.32  | 1.027 | ENSG00000041353 | RAB27B   | protein_coding |
| 0.025834 | 0.32  | 0.972 | ENSG00000110721 | CHKA     | protein_coding |
| 0.025842 | 0.32  | 1.029 | ENSG00000176105 | YES1     | protein_coding |
| 0.025848 | 0.32  | 1.006 | ENSG00000142634 | EFHD2    | protein_coding |
| 0.025894 | 0.321 | 1.073 | ENSG00000166170 | BAG5     | protein_coding |
| 0.025947 | 0.321 | 1.131 | ENSG00000111696 | NT5DC3   | protein_coding |
| 0.025948 | 0.321 | 1.121 | ENSG00000196505 | GDAP2    | protein_coding |
| 0.025985 | 0.321 | 1.118 | ENSG00000203943 | SAMD13   | protein_coding |
| 0.026026 | 0.321 | 1.037 | ENSG00000143167 | GPA33    | protein_coding |
| 0.02605  | 0.321 | 1.023 | ENSG00000165449 | SLC16A9  | protein_coding |
| 0.02605  | 0.321 | 0.931 | ENSG00000175463 | TBC1D10C | protein_coding |
| 0.026051 | 0.321 | 1.131 | ENSG00000185761 | ADAMTSL5 | protein_coding |
| 0.026091 | 0.321 | 1.016 | ENSG00000006831 | ADIPOR2  | protein_coding |
| 0.026112 | 0.321 | 0.886 | ENSG00000185565 | LSAMP    | protein_coding |
| 0.026129 | 0.321 | 1.057 | ENSG00000124151 | NCOA3    | protein_coding |
| 0.026208 | 0.321 | 1.185 | ENSG00000198948 | MFAP3L   | protein_coding |
| 0.026259 | 0.321 | 1.015 | ENSG00000155506 | LARP1    | protein_coding |

|          |       |       |                 |               |                |
|----------|-------|-------|-----------------|---------------|----------------|
| 0.026282 | 0.321 | 0.955 | ENSG00000123329 | ARHGAP9       | protein_coding |
| 0.026306 | 0.321 | 1.046 | ENSG00000136002 | ARHGEF4       | protein_coding |
| 0.026308 | 0.321 | 1.106 | ENSG00000008083 | JARID2        | protein_coding |
| 0.026317 | 0.321 | 1.075 | ENSG00000170775 | GPR37         | protein_coding |
| 0.026319 | 0.321 | 0.972 | ENSG00000145022 | TCTA          | protein_coding |
| 0.026335 | 0.321 | 1.084 | ENSG00000173705 | SUSD5         | protein_coding |
| 0.026392 | 0.322 | 1.024 | ENSG00000173482 | PTPRM         | protein_coding |
| 0.026427 | 0.322 | 1.017 | ENSG00000168575 | SLC20A2       | protein_coding |
| 0.026462 | 0.322 | 1.064 | ENSG00000042088 | TDP1          | protein_coding |
| 0.026463 | 0.322 | 1.091 | ENSG00000135220 | UGT2A3        | protein_coding |
| 0.026491 | 0.322 | 0.985 | ENSG00000151500 | THYN1         | protein_coding |
| 0.026532 | 0.322 | 1.019 | ENSG00000120211 | INSL4         | protein_coding |
| 0.02668  | 0.324 | 1.012 | ENSG00000111666 | CHPT1         | protein_coding |
| 0.026782 | 0.324 | 0.999 | ENSG00000223865 | HLA-DPB1      | protein_coding |
| 0.026783 | 0.324 | 1.011 | ENSG00000107581 | EIF3A         | protein_coding |
| 0.026805 | 0.324 | 1.047 | ENSG00000167721 | TSR1          | protein_coding |
| 0.026861 | 0.324 | 1.002 | ENSG00000167460 | TPM4          | protein_coding |
| 0.026868 | 0.324 | 1.09  | ENSG00000157470 | FAM81A        | protein_coding |
| 0.026868 | 0.324 | 1.174 | ENSG00000241852 | C8orf58       | protein_coding |
| 0.02687  | 0.324 | 1.007 | ENSG00000122884 | P4HA1         | protein_coding |
| 0.026929 | 0.325 | 1.101 | ENSG00000176678 | FOXL1         | protein_coding |
| 0.026941 | 0.325 | 1.008 | ENSG00000097021 | ACOT7         | protein_coding |
| 0.026997 | 0.325 | 1.075 | ENSG00000169876 | MUC17         | protein_coding |
| 0.027188 | 0.327 | 0.914 | ENSG00000139194 | RBP5          | protein_coding |
| 0.027205 | 0.327 | 1.013 | ENSG00000150722 | PPP1R1C       | protein_coding |
| 0.027252 | 0.327 | 1.001 | ENSG00000160213 | CSTB          | protein_coding |
| 0.027281 | 0.327 | 1.07  | ENSG00000241945 | PWP2          | protein_coding |
| 0.027289 | 0.327 | 0.944 | ENSG00000176476 | CCDC101       | protein_coding |
| 0.027326 | 0.327 | 0.921 | ENSG00000226777 | KIAA0125      | lincRNA        |
| 0.027458 | 0.329 | 1     | ENSG00000171560 | FGA           | protein_coding |
| 0.027506 | 0.329 | 1.013 | ENSG00000236453 | AC003092.1    | lincRNA        |
| 0.027655 | 0.33  | 1.046 | ENSG00000116199 | FAM20B        | protein_coding |
| 0.027671 | 0.33  | 0.921 | ENSG00000091592 | NLRP1         | protein_coding |
| 0.027671 | 0.33  | 0.825 | ENSG00000229124 | RP11-124N14.4 | antisense      |
| 0.027734 | 0.33  | 1.058 | ENSG00000124216 | SNAI1         | protein_coding |
| 0.027743 | 0.33  | 1.069 | ENSG00000182749 | PAQR7         | protein_coding |

|          |       |       |                 |              |                |
|----------|-------|-------|-----------------|--------------|----------------|
| 0.027772 | 0.331 | 1.061 | ENSG00000172548 | NIPAL4       | protein_coding |
| 0.02784  | 0.331 | 1.021 | ENSG00000080031 | PTPRH        | protein_coding |
| 0.027927 | 0.332 | 0.98  | ENSG00000196586 | MYO6         | protein_coding |
| 0.027974 | 0.332 | 1.488 | ENSG00000118520 | ARG1         | protein_coding |
| 0.028    | 0.332 | 0.958 | ENSG00000182208 | MOB2         | protein_coding |
| 0.028025 | 0.332 | 0.786 | ENSG00000083828 | ZNF586       | protein_coding |
| 0.028026 | 0.332 | 1.001 | ENSG00000204983 | PRSS1        | protein_coding |
| 0.028057 | 0.332 | 0.855 | ENSG00000063176 | SPHK2        | protein_coding |
| 0.028182 | 0.333 | 1.043 | ENSG00000188483 | IER5L        | protein_coding |
| 0.028204 | 0.333 | 1.184 | ENSG00000249590 | RP4-539M6.19 | protein_coding |
| 0.028206 | 0.333 | 0.914 | ENSG00000172215 | CXCR6        | protein_coding |
| 0.028226 | 0.333 | 1.02  | ENSG00000105887 | MTPN         | protein_coding |
| 0.028264 | 0.333 | 1.085 | ENSG00000196810 | CTBP1-AS1    | antisense      |
| 0.028283 | 0.333 | 0.979 | ENSG00000167286 | CD3D         | protein_coding |
| 0.028293 | 0.333 | 1.028 | ENSG00000211455 | STK38L       | protein_coding |
| 0.028311 | 0.333 | 1.038 | ENSG00000236673 | RP11-69I8.2  | lincRNA        |
| 0.028374 | 0.333 | 1.033 | ENSG00000164823 | OSGIN2       | protein_coding |
| 0.028435 | 0.333 | 0.942 | ENSG00000103274 | NUBP1        | protein_coding |
| 0.028489 | 0.333 | 1.042 | ENSG00000064726 | BTBD1        | protein_coding |
| 0.028502 | 0.333 | 0.799 | ENSG00000162148 | PPP1R32      | protein_coding |
| 0.028519 | 0.333 | 1.013 | ENSG00000155363 | MOV10        | protein_coding |
| 0.028522 | 0.333 | 0.885 | ENSG00000171533 | MAP6         | protein_coding |
| 0.028586 | 0.333 | 1.003 | ENSG00000178473 | UCN3         | protein_coding |
| 0.02859  | 0.333 | 1.007 | ENSG00000086061 | DNAJA1       | protein_coding |
| 0.02859  | 0.333 | 1.041 | ENSG00000143061 | IGSF3        | protein_coding |
| 0.028646 | 0.333 | 1.079 | ENSG00000134852 | CLOCK        | protein_coding |
| 0.028651 | 0.333 | 0.781 | ENSG00000137098 | SPAG8        | protein_coding |
| 0.028675 | 0.333 | 1.004 | ENSG00000094755 | GABRP        | protein_coding |
| 0.028708 | 0.333 | 1.058 | ENSG00000182552 | RWDD4        | protein_coding |
| 0.028712 | 0.333 | 1.005 | ENSG00000196141 | SPATS2L      | protein_coding |
| 0.028717 | 0.333 | 1.011 | ENSG00000147454 | SLC25A37     | protein_coding |
| 0.02872  | 0.333 | 0.828 | ENSG00000176542 | KIAA2018     | protein_coding |
| 0.028722 | 0.333 | 1.032 | ENSG00000009844 | VTA1         | protein_coding |
| 0.028762 | 0.334 | 1.055 | ENSG00000198768 | APCDD1L      | protein_coding |
| 0.028821 | 0.334 | 0.989 | ENSG00000171346 | KRT15        | protein_coding |
| 0.028823 | 0.334 | 1.127 | ENSG00000228318 | AP001610.5   | antisense      |

|          |       |       |                 |           |                |
|----------|-------|-------|-----------------|-----------|----------------|
| 0.028928 | 0.335 | 0.906 | ENSG00000137078 | SIT1      | protein_coding |
| 0.028935 | 0.335 | 1.025 | ENSG00000176903 | PNMA1     | protein_coding |
| 0.028963 | 0.335 | 0.902 | ENSG00000168297 | PXK       | protein_coding |
| 0.028999 | 0.335 | 1.018 | ENSG00000104131 | EIF3J     | protein_coding |
| 0.029033 | 0.335 | 1.014 | ENSG00000123374 | CDK2      | protein_coding |
| 0.029059 | 0.335 | 1.105 | ENSG00000005513 | SOX8      | protein_coding |
| 0.029072 | 0.335 | 1.031 | ENSG00000140044 | JDP2      | protein_coding |
| 0.029099 | 0.335 | 1.009 | ENSG00000203485 | INF2      | protein_coding |
| 0.029214 | 0.336 | 1.187 | ENSG00000128923 | FAM63B    | protein_coding |
| 0.029279 | 0.336 | 1.044 | ENSG00000121211 | MND1      | protein_coding |
| 0.029283 | 0.336 | 0.972 | ENSG00000166105 | GLB1L3    | protein_coding |
| 0.029386 | 0.337 | 1.044 | ENSG00000197498 | RPF2      | protein_coding |
| 0.029397 | 0.337 | 1.073 | ENSG00000198142 | SOWAHC    | protein_coding |
| 0.029442 | 0.337 | 1.029 | ENSG00000138180 | CEP55     | protein_coding |
| 0.029503 | 0.337 | 1.096 | ENSG00000146410 | FAM54A    | protein_coding |
| 0.029508 | 0.337 | 1.037 | ENSG00000168556 | ING2      | protein_coding |
| 0.029558 | 0.337 | 0.894 | ENSG00000103264 | FBXO31    | protein_coding |
| 0.029565 | 0.337 | 0.607 | ENSG00000151892 | GFRA1     | protein_coding |
| 0.029571 | 0.337 | 1.037 | ENSG00000097007 | ABL1      | protein_coding |
| 0.029595 | 0.337 | 0.987 | ENSG00000132581 | SDF2      | protein_coding |
| 0.029638 | 0.338 | 1.019 | ENSG00000006451 | RALA      | protein_coding |
| 0.029703 | 0.338 | 1.099 | ENSG00000198146 | ZNF770    | protein_coding |
| 0.029746 | 0.338 | 0.913 | ENSG00000169249 | ZRSR2     | protein_coding |
| 0.029775 | 0.338 | 0.963 | ENSG00000139193 | CD27      | protein_coding |
| 0.029797 | 0.338 | 0.429 | ENSG00000170324 | FRMPD2    | protein_coding |
| 0.029841 | 0.339 | 0.98  | ENSG00000128590 | DNAJB9    | protein_coding |
| 0.029881 | 0.339 | 1.079 | ENSG00000100335 | SMCR7L    | protein_coding |
| 0.029897 | 0.339 | 1.027 | ENSG00000058804 | TMEM48    | protein_coding |
| 0.029914 | 0.339 | 1.143 | ENSG00000110427 | KIAA1549L | protein_coding |
| 0.029954 | 0.339 | 1.085 | ENSG00000097046 | CDC7      | protein_coding |
| 0.030035 | 0.339 | 0.924 | ENSG00000166669 | ATF7IP2   | protein_coding |
| 0.030072 | 0.339 | 1.018 | ENSG00000028203 | VEZT      | protein_coding |
| 0.030094 | 0.339 | 1.022 | ENSG00000144655 | CSRNP1    | protein_coding |
| 0.030152 | 0.339 | 0.981 | ENSG00000151498 | ACAD8     | protein_coding |
| 0.030157 | 0.339 | 1.052 | ENSG00000100599 | RIN3      | protein_coding |
| 0.030167 | 0.339 | 1.064 | ENSG00000112290 | WASF1     | protein_coding |

|          |       |       |                 |            |                      |
|----------|-------|-------|-----------------|------------|----------------------|
| 0.030187 | 0.339 | 1.01  | ENSG00000122952 | ZWINT      | protein_coding       |
| 0.030194 | 0.339 | 0.861 | ENSG00000145362 | ANK2       | protein_coding       |
| 0.030201 | 0.339 | 1.013 | ENSG00000104695 | PPP2CB     | protein_coding       |
| 0.030202 | 0.339 | 1.007 | ENSG00000071127 | WDR1       | protein_coding       |
| 0.03021  | 0.339 | 0.947 | ENSG00000141579 | ZNF750     | protein_coding       |
| 0.030218 | 0.339 | 1.017 | ENSG00000173674 | EIF1AX     | protein_coding       |
| 0.030241 | 0.339 | 1.04  | ENSG00000166889 | PATL1      | protein_coding       |
| 0.030254 | 0.339 | 1.115 | ENSG00000151136 | BTBD11     | protein_coding       |
| 0.0303   | 0.339 | 1.012 | ENSG00000215301 | DDX3X      | protein_coding       |
| 0.030382 | 0.34  | 1.011 | ENSG00000131876 | SNRPA1     | protein_coding       |
| 0.030445 | 0.34  | 1.028 | ENSG00000121152 | NCAPH      | protein_coding       |
| 0.030529 | 0.341 | 1.024 | ENSG00000139722 | VPS37B     | protein_coding       |
| 0.030632 | 0.342 | 1.008 | ENSG00000105401 | CDC37      | protein_coding       |
| 0.030685 | 0.342 | 1.047 | ENSG00000157538 | DSCR3      | protein_coding       |
| 0.030745 | 0.342 | 1.008 | ENSG00000099940 | SNAP29     | protein_coding       |
| 0.030761 | 0.342 | 1.041 | ENSG00000137962 | ARHGAP29   | protein_coding       |
| 0.030827 | 0.343 | 1.041 | ENSG00000198586 | TLK1       | protein_coding       |
| 0.030828 | 0.343 | 1.004 | ENSG00000072274 | TFRC       | protein_coding       |
| 0.030858 | 0.343 | 0.994 | ENSG00000136352 | NKX2-1     | protein_coding       |
| 0.030928 | 0.343 | 0.958 | ENSG00000183508 | FAM46C     | protein_coding       |
| 0.030928 | 0.343 | 0.809 | ENSG00000148832 | PAOX       | protein_coding       |
| 0.030933 | 0.343 | 1.107 | ENSG00000198513 | ATL1       | protein_coding       |
| 0.030954 | 0.343 | 0.993 | ENSG00000105519 | CAPS       | protein_coding       |
| 0.030974 | 0.343 | 1.039 | ENSG00000139116 | KIF21A     | protein_coding       |
| 0.031085 | 0.344 | 0.968 | ENSG00000181523 | SGSH       | protein_coding       |
| 0.031149 | 0.344 | 1.01  | ENSG00000204267 | TAP2       | protein_coding       |
| 0.031164 | 0.344 | 1.701 | ENSG00000148680 | HTR7       | protein_coding       |
| 0.03124  | 0.345 | 0.979 | ENSG00000247774 | PCED1B-AS1 | processed_transcript |
| 0.031271 | 0.345 | 0.995 | ENSG00000108654 | DDX5       | protein_coding       |
| 0.031305 | 0.345 | 0.949 | ENSG00000197165 | SULT1A2    | protein_coding       |
| 0.031366 | 0.345 | 0.94  | ENSG00000076351 | SLC46A1    | protein_coding       |
| 0.031404 | 0.345 | 1.016 | ENSG00000123064 | DDX54      | protein_coding       |
| 0.031437 | 0.346 | 0.912 | ENSG00000137103 | TMEM8B     | protein_coding       |
| 0.031491 | 0.346 | 1.082 | ENSG00000125741 | OPA3       | protein_coding       |
| 0.031501 | 0.346 | 1.009 | ENSG00000076706 | MCAM       | protein_coding       |
| 0.031551 | 0.346 | 1.053 | ENSG00000198498 | TMA16      | protein_coding       |

|          |       |       |                 |              |                |
|----------|-------|-------|-----------------|--------------|----------------|
| 0.03159  | 0.346 | 1.015 | ENSG00000106554 | CHCHD3       | protein_coding |
| 0.03161  | 0.346 | 0.851 | ENSG00000236859 | AC018737.1   | antisense      |
| 0.0318   | 0.348 | 1.048 | ENSG00000162599 | NFIA         | protein_coding |
| 0.031869 | 0.348 | 1.042 | ENSG00000180745 | CLRN3        | protein_coding |
| 0.031879 | 0.348 | 0.965 | ENSG00000149582 | TMEM25       | protein_coding |
| 0.031881 | 0.348 | 0.956 | ENSG00000064545 | TMEM161A     | protein_coding |
| 0.031915 | 0.348 | 1.16  | ENSG00000189433 | GJB4         | protein_coding |
| 0.031994 | 0.349 | 1.054 | ENSG00000169436 | COL22A1      | protein_coding |
| 0.032    | 0.349 | 0.114 | ENSG00000112818 | MEP1A        | protein_coding |
| 0.032139 | 0.35  | 1.016 | ENSG00000075213 | SEMA3A       | protein_coding |
| 0.032165 | 0.35  | 1.048 | ENSG00000185009 | AP3M1        | protein_coding |
| 0.032262 | 0.351 | 1.012 | ENSG00000111335 | OAS2         | protein_coding |
| 0.032268 | 0.351 | 1.016 | ENSG00000248538 | RP11-10A14.5 | lincRNA        |
| 0.032296 | 0.351 | 0.882 | ENSG00000214050 | FBXO16       | protein_coding |
| 0.032374 | 0.351 | 0.91  | ENSG00000178935 | ZNF552       | protein_coding |
| 0.032394 | 0.351 | 0.89  | ENSG00000145088 | EAF2         | protein_coding |
| 0.032456 | 0.351 | 1.05  | ENSG00000168502 | SOGA2        | protein_coding |
| 0.032504 | 0.351 | 0.945 | ENSG00000186104 | CYP2R1       | protein_coding |
| 0.032515 | 0.351 | 1.127 | ENSG00000151640 | DPYSL4       | protein_coding |
| 0.032516 | 0.351 | 1.002 | ENSG00000160789 | LMNA         | protein_coding |
| 0.032522 | 0.351 | 1.008 | ENSG00000099812 | C19orf21     | protein_coding |
| 0.032547 | 0.351 | 0.849 | ENSG00000124374 | PAIP2B       | protein_coding |
| 0.032638 | 0.352 | 1.022 | ENSG00000169855 | ROBO1        | protein_coding |
| 0.032671 | 0.352 | 1.026 | ENSG00000213949 | ITGA1        | protein_coding |
| 0.03269  | 0.352 | 1.076 | ENSG00000083642 | PDS5B        | protein_coding |
| 0.032734 | 0.352 | 1.009 | ENSG00000136295 | TTYH3        | protein_coding |
| 0.032761 | 0.352 | 1.002 | ENSG00000088986 | DYNLL1       | protein_coding |
| 0.032859 | 0.353 | 1.005 | ENSG00000188157 | AGRN         | protein_coding |
| 0.032899 | 0.353 | 1.047 | ENSG00000136143 | SUCLA2       | protein_coding |
| 0.03291  | 0.353 | 1.061 | ENSG00000187824 | TMEM220      | protein_coding |
| 0.032936 | 0.353 | 1.03  | ENSG00000106688 | SLC1A1       | protein_coding |
| 0.032971 | 0.353 | 1.16  | ENSG00000143322 | ABL2         | protein_coding |
| 0.033004 | 0.353 | 0.96  | ENSG00000101417 | PXMP4        | protein_coding |
| 0.033021 | 0.353 | 1.035 | ENSG00000198056 | PRIM1        | protein_coding |
| 0.033033 | 0.353 | 0.958 | ENSG00000122122 | SASH3        | protein_coding |
| 0.033036 | 0.353 | 1.087 | ENSG00000143147 | GPR161       | protein_coding |



|          |       |       |                 |              |                |
|----------|-------|-------|-----------------|--------------|----------------|
| 0.033048 | 0.353 | 1.012 | ENSG00000111331 | OAS3         | protein_coding |
| 0.033101 | 0.353 | 1.087 | ENSG00000020922 | MRE11A       | protein_coding |
| 0.033154 | 0.353 | 1.151 | ENSG00000119906 | FAM178A      | protein_coding |
| 0.033161 | 0.353 | 1.042 | ENSG00000107862 | GBF1         | protein_coding |
| 0.033197 | 0.353 | 1.042 | ENSG00000213214 | ARHGEF35     | protein_coding |
| 0.0332   | 0.353 | 1.072 | ENSG00000129194 | SOX15        | protein_coding |
| 0.033267 | 0.354 | 1.018 | ENSG00000129667 | RHBDF2       | protein_coding |
| 0.033284 | 0.354 | 1.03  | ENSG00000158158 | CNNM4        | protein_coding |
| 0.033303 | 0.354 | 1.005 | ENSG00000128050 | PAICS        | protein_coding |
| 0.033367 | 0.354 | 1.079 | ENSG00000174791 | RIN1         | protein_coding |
| 0.033382 | 0.354 | 1.013 | ENSG00000105755 | ETHE1        | protein_coding |
| 0.033399 | 0.354 | 0.834 | ENSG00000203288 | RP11-98D18.9 | antisense      |
| 0.033471 | 0.354 | 1.004 | ENSG00000103202 | NME4         | protein_coding |
| 0.033474 | 0.354 | 0.905 | ENSG00000160908 | ZNF394       | protein_coding |
| 0.033486 | 0.354 | 1.148 | ENSG00000168807 | SNTB2        | protein_coding |
| 0.033561 | 0.355 | 0.97  | ENSG00000103460 | TOX3         | protein_coding |
| 0.033653 | 0.355 | 1.218 | ENSG00000146858 | ZC3HAV1L     | protein_coding |
| 0.033659 | 0.355 | 1.02  | ENSG00000116237 | ICMT         | protein_coding |
| 0.033745 | 0.356 | 1.004 | ENSG00000166681 | NGFRAP1      | protein_coding |
| 0.033762 | 0.356 | 1     | ENSG00000204287 | HLA-DRA      | protein_coding |
| 0.034041 | 0.358 | 1.033 | ENSG00000067955 | CBFB         | protein_coding |
| 0.034042 | 0.358 | 1.02  | ENSG00000089472 | HEPH         | protein_coding |
| 0.034043 | 0.358 | 1.023 | ENSG00000166250 | CLMP         | protein_coding |
| 0.034113 | 0.358 | 0.964 | ENSG00000215915 | ATAD3C       | protein_coding |
| 0.034122 | 0.358 | 1.003 | ENSG00000107159 | CA9          | protein_coding |
| 0.034124 | 0.358 | 1.049 | ENSG00000132749 | MTL5         | protein_coding |
| 0.034136 | 0.358 | 1.032 | ENSG00000172845 | SP3          | protein_coding |
| 0.034143 | 0.358 | 1.027 | ENSG00000197170 | PSMD12       | protein_coding |
| 0.034171 | 0.358 | 1.04  | ENSG00000156787 | WDR67        | protein_coding |
| 0.034202 | 0.358 | 1.103 | ENSG00000239839 | DEFA3        | protein_coding |
| 0.034292 | 0.358 | 0.889 | ENSG00000118308 | LRMP         | protein_coding |
| 0.034311 | 0.358 | 1.061 | ENSG00000166881 | TMEM194A     | protein_coding |
| 0.034322 | 0.358 | 0.835 | ENSG00000185905 | C16orf54     | protein_coding |
| 0.034372 | 0.358 | 0.762 | ENSG00000169239 | CA5B         | protein_coding |
| 0.034416 | 0.358 | 0.958 | ENSG00000175575 | PAAF1        | protein_coding |
| 0.034423 | 0.358 | 1.113 | ENSG00000215712 | TMEM242      | protein_coding |

|          |       |       |                 |           |                |
|----------|-------|-------|-----------------|-----------|----------------|
| 0.034437 | 0.358 | 1.118 | ENSG00000146276 | GABRR1    | protein_coding |
| 0.034457 | 0.358 | 1.015 | ENSG00000108219 | TSPAN14   | protein_coding |
| 0.034511 | 0.359 | 1.006 | ENSG00000109854 | HTATIP2   | protein_coding |
| 0.034544 | 0.359 | 1.035 | ENSG00000116750 | UCHL5     | protein_coding |
| 0.034578 | 0.359 | 1.101 | ENSG00000166822 | TMEM170A  | protein_coding |
| 0.034581 | 0.359 | 1.042 | ENSG00000134146 | ATPBD4    | protein_coding |
| 0.034693 | 0.359 | 0.833 | ENSG00000188687 | SLC4A5    | protein_coding |
| 0.034706 | 0.359 | 0.958 | ENSG00000189283 | FHIT      | protein_coding |
| 0.03473  | 0.359 | 1.01  | ENSG00000165102 | HGSNAT    | protein_coding |
| 0.034741 | 0.359 | 0.929 | ENSG00000125352 | RNF113A   | protein_coding |
| 0.034753 | 0.359 | 0.992 | ENSG00000184489 | PTP4A3    | protein_coding |
| 0.034824 | 0.36  | 0.939 | ENSG00000180730 | SHISA2    | protein_coding |
| 0.034875 | 0.36  | 1.003 | ENSG00000134827 | TCN1      | protein_coding |
| 0.034885 | 0.36  | 1.057 | ENSG00000174442 | ZWILCH    | protein_coding |
| 0.034983 | 0.361 | 1.022 | ENSG00000164683 | HEY1      | protein_coding |
| 0.035072 | 0.361 | 1.016 | ENSG00000142694 | FAM176B   | protein_coding |
| 0.035086 | 0.361 | 1.112 | ENSG00000163530 | DPPA2     | protein_coding |
| 0.035126 | 0.361 | 0.765 | ENSG00000139537 | CCDC65    | protein_coding |
| 0.035176 | 0.361 | 0.824 | ENSG00000179598 | PLD6      | protein_coding |
| 0.035189 | 0.361 | 0.922 | ENSG00000165548 | TMEM63C   | protein_coding |
| 0.0352   | 0.361 | 1.007 | ENSG00000184900 | SUMO3     | protein_coding |
| 0.035203 | 0.361 | 0.961 | ENSG00000122299 | ZC3H7A    | protein_coding |
| 0.03528  | 0.362 | 1.011 | ENSG00000099783 | HNRNPM    | protein_coding |
| 0.035317 | 0.362 | 1.073 | ENSG00000104722 | NEFM      | protein_coding |
| 0.035347 | 0.362 | 0.997 | ENSG00000123131 | PRDX4     | protein_coding |
| 0.035381 | 0.362 | 0.677 | ENSG00000136449 | MYCBPAP   | protein_coding |
| 0.035382 | 0.362 | 1.039 | ENSG00000138303 | ASCC1     | protein_coding |
| 0.035512 | 0.363 | 0.916 | ENSG00000141569 | TRIM65    | protein_coding |
| 0.035633 | 0.364 | 0.993 | ENSG00000165140 | FBP1      | protein_coding |
| 0.035652 | 0.364 | 1.001 | ENSG00000105825 | TFPI2     | protein_coding |
| 0.035714 | 0.364 | 1.028 | ENSG00000172137 | CALB2     | protein_coding |
| 0.03572  | 0.364 | 1.002 | ENSG00000105220 | GPI       | protein_coding |
| 0.035723 | 0.364 | 1.026 | ENSG00000141503 | MINK1     | protein_coding |
| 0.035758 | 0.364 | 1.002 | ENSG00000122566 | HNRNPA2B1 | protein_coding |
| 0.035767 | 0.364 | 0.918 | ENSG00000119866 | BCL11A    | protein_coding |
| 0.035775 | 0.364 | 1.005 | ENSG00000197324 | LRP10     | protein_coding |

|          |       |       |                 |               |                      |
|----------|-------|-------|-----------------|---------------|----------------------|
| 0.035849 | 0.364 | 0.976 | ENSG00000126778 | SIX1          | protein_coding       |
| 0.035859 | 0.364 | 0.878 | ENSG00000234753 | RP11-328M4.2  | antisense            |
| 0.035874 | 0.364 | 2.398 | ENSG00000152086 | TUBA3E        | protein_coding       |
| 0.035981 | 0.364 | 1.159 | ENSG0000010539  | ZNF200        | protein_coding       |
| 0.036015 | 0.364 | 1.046 | ENSG0000011332  | DPF1          | protein_coding       |
| 0.036018 | 0.364 | 0.997 | ENSG00000132386 | SERPINF1      | protein_coding       |
| 0.036029 | 0.364 | 1.017 | ENSG00000136270 | TBRG4         | protein_coding       |
| 0.036032 | 0.364 | 1.02  | ENSG00000071539 | TRIP13        | protein_coding       |
| 0.036126 | 0.364 | 0.991 | ENSG00000113811 | RP11-884K10.5 | protein_coding       |
| 0.036159 | 0.364 | 0.989 | ENSG00000173376 | NDNF          | protein_coding       |
| 0.036163 | 0.364 | 0.981 | ENSG00000214046 | C19orf42      | protein_coding       |
| 0.036203 | 0.364 | 1.218 | ENSG00000119509 | INVS          | protein_coding       |
| 0.03622  | 0.364 | 1.227 | ENSG00000131096 | PYY           | protein_coding       |
| 0.03623  | 0.364 | 1.016 | ENSG00000111665 | CDCA3         | protein_coding       |
| 0.036246 | 0.364 | 1.017 | ENSG00000174564 | IL20RB        | protein_coding       |
| 0.036271 | 0.364 | 1.012 | ENSG00000110047 | EHD1          | protein_coding       |
| 0.036278 | 0.364 | 1.009 | ENSG00000164096 | C4orf3        | protein_coding       |
| 0.036324 | 0.364 | 0.987 | ENSG00000108950 | FAM20A        | protein_coding       |
| 0.036334 | 0.364 | 0.866 | ENSG00000250237 | CTC-498J12.1  | lincRNA              |
| 0.036368 | 0.364 | 0.814 | ENSG00000204428 | LY6G5C        | protein_coding       |
| 0.036371 | 0.364 | 0.99  | ENSG00000239779 | WBP1          | protein_coding       |
| 0.036373 | 0.364 | 0.995 | ENSG00000104870 | FCGRT         | protein_coding       |
| 0.036451 | 0.365 | 0.845 | ENSG00000233483 | CTD-2020K17.4 | antisense            |
| 0.036485 | 0.365 | 0.976 | ENSG00000186907 | RTN4RL2       | protein_coding       |
| 0.036497 | 0.365 | 1.059 | ENSG00000177335 | C8orf31       | processed_transcript |
| 0.036595 | 0.365 | 1.078 | ENSG00000151092 | NGLY1         | protein_coding       |
| 0.036701 | 0.366 | 1.053 | ENSG00000107201 | DDX58         | protein_coding       |
| 0.036722 | 0.366 | 1.001 | ENSG00000135047 | CTSL1         | protein_coding       |
| 0.036807 | 0.366 | 1.047 | ENSG00000164128 | NPY1R         | protein_coding       |
| 0.036833 | 0.366 | 1.005 | ENSG00000066322 | ELOVL1        | protein_coding       |
| 0.03687  | 0.366 | 1.039 | ENSG00000158104 | HPD           | protein_coding       |
| 0.036871 | 0.366 | 1.002 | ENSG00000196878 | LAMB3         | protein_coding       |
| 0.036875 | 0.366 | 1.012 | ENSG00000136450 | SRSF1         | protein_coding       |
| 0.03697  | 0.367 | 0.925 | ENSG00000196167 | C11orf92      | antisense            |
| 0.036976 | 0.367 | 0.992 | ENSG00000184584 | TMEM173       | protein_coding       |
| 0.037011 | 0.367 | 0.796 | ENSG00000163704 | PRRT3         | protein_coding       |

|          |       |       |                 |            |                |
|----------|-------|-------|-----------------|------------|----------------|
| 0.037023 | 0.367 | 0.952 | ENSG00000173540 | GMPPB      | protein_coding |
| 0.037135 | 0.368 | 1.051 | ENSG00000189057 | FAM111B    | protein_coding |
| 0.037143 | 0.368 | 1.037 | ENSG00000109805 | NCAPG      | protein_coding |
| 0.037241 | 0.368 | 0.941 | ENSG00000162104 | ADCY9      | protein_coding |
| 0.037281 | 0.369 | 1.134 | ENSG00000146776 | ATXN7L1    | protein_coding |
| 0.037377 | 0.369 | 0.966 | ENSG00000167925 | GHDC       | protein_coding |
| 0.037401 | 0.369 | 1.004 | ENSG00000114638 | UPK1B      | protein_coding |
| 0.037515 | 0.37  | 1.072 | ENSG00000230733 | AC092171.4 | lincRNA        |
| 0.037613 | 0.371 | 1.023 | ENSG00000110660 | SLC35F2    | protein_coding |
| 0.03762  | 0.371 | 1.036 | ENSG00000163166 | IWS1       | protein_coding |
| 0.037682 | 0.371 | 0.891 | ENSG00000172322 | CLEC12A    | protein_coding |
| 0.037717 | 0.371 | 1.008 | ENSG00000136271 | DDX56      | protein_coding |
| 0.037729 | 0.371 | 1.021 | ENSG00000134690 | CDCA8      | protein_coding |
| 0.037788 | 0.371 | 0.715 | ENSG00000179761 | PIPOX      | protein_coding |
| 0.037851 | 0.372 | 0.989 | ENSG00000105369 | CD79A      | protein_coding |
| 0.037918 | 0.372 | 1.093 | ENSG00000075391 | RASAL2     | protein_coding |
| 0.03795  | 0.372 | 0.853 | ENSG00000021645 | NRXN3      | protein_coding |
| 0.038204 | 0.374 | 1.115 | ENSG00000085185 | BCORL1     | protein_coding |
| 0.038262 | 0.375 | 1.066 | ENSG00000101945 | SUV39H1    | protein_coding |
| 0.038282 | 0.375 | 1.005 | ENSG00000168385 | 41884      | protein_coding |
| 0.03832  | 0.375 | 1.005 | ENSG00000104687 | GSR        | protein_coding |
| 0.038427 | 0.376 | 0.881 | ENSG00000178796 | RIIAD1     | protein_coding |
| 0.038571 | 0.377 | 1.027 | ENSG00000179295 | PTPN11     | protein_coding |
| 0.038633 | 0.377 | 0.777 | ENSG00000135338 | LCA5       | protein_coding |
| 0.038692 | 0.377 | 1.074 | ENSG00000122592 | HOXA7      | protein_coding |
| 0.038702 | 0.377 | 0.966 | ENSG00000068903 | SIRT2      | protein_coding |
| 0.038707 | 0.377 | 1.018 | ENSG00000023839 | ABCC2      | protein_coding |
| 0.038773 | 0.378 | 1.009 | ENSG00000114416 | FXR1       | protein_coding |
| 0.038842 | 0.378 | 1.03  | ENSG00000128487 | SPECC1     | protein_coding |
| 0.038896 | 0.378 | 1.014 | ENSG00000166582 | CENPV      | protein_coding |
| 0.038913 | 0.378 | 1.009 | ENSG00000164880 | INTS1      | protein_coding |
| 0.038915 | 0.378 | 1.006 | ENSG00000171552 | BCL2L1     | protein_coding |
| 0.038928 | 0.378 | 0.834 | ENSG00000144182 | LIPT1      | protein_coding |
| 0.03893  | 0.378 | 0.912 | ENSG00000158220 | ESYT3      | protein_coding |
| 0.038995 | 0.378 | 1.01  | ENSG00000100764 | PSMC1      | protein_coding |
| 0.039058 | 0.378 | 1.034 | ENSG00000163661 | PTX3       | protein_coding |

|          |       |       |                 |            |                |
|----------|-------|-------|-----------------|------------|----------------|
| 0.039122 | 0.379 | 1.03  | ENSG00000236886 | AC007563.5 | antisense      |
| 0.039156 | 0.379 | 1.034 | ENSG00000160294 | MCM3AP     | protein_coding |
| 0.039208 | 0.379 | 1.04  | ENSG00000085760 | MTIF2      | protein_coding |
| 0.039258 | 0.379 | 1.007 | ENSG00000169372 | CRADD      | protein_coding |
| 0.039264 | 0.379 | 1.022 | ENSG00000164308 | ERAP2      | protein_coding |
| 0.039328 | 0.38  | 0.823 | ENSG00000182162 | P2RY8      | protein_coding |
| 0.039386 | 0.38  | 1.089 | ENSG00000143479 | DYRK3      | protein_coding |
| 0.039431 | 0.38  | 1.013 | ENSG00000186174 | BCL9L      | protein_coding |
| 0.039558 | 0.381 | 0.999 | ENSG00000179344 | HLA-DQB1   | protein_coding |
| 0.039634 | 0.381 | 1.004 | ENSG00000111481 | COPZ1      | protein_coding |
| 0.039659 | 0.381 | 1.036 | ENSG00000146918 | NCAPG2     | protein_coding |
| 0.039665 | 0.381 | 1.101 | ENSG00000075702 | WDR62      | protein_coding |
| 0.039669 | 0.381 | 1.026 | ENSG00000050748 | MAPK9      | protein_coding |
| 0.039729 | 0.381 | 1.072 | ENSG00000153294 | GPR115     | protein_coding |
| 0.039832 | 0.382 | 1.009 | ENSG00000124795 | DEK        | protein_coding |
| 0.039864 | 0.382 | 1.007 | ENSG00000073921 | PICALM     | protein_coding |
| 0.039904 | 0.382 | 1.016 | ENSG00000106268 | NUDT1      | protein_coding |
| 0.039947 | 0.383 | 1.27  | ENSG00000174007 | CEP19      | protein_coding |
| 0.040003 | 0.383 | 1.007 | ENSG00000103855 | CD276      | protein_coding |
| 0.040093 | 0.383 | 1.035 | ENSG00000133997 | MED6       | protein_coding |
| 0.040156 | 0.384 | 1.045 | ENSG00000163249 | CCNYL1     | protein_coding |
| 0.040168 | 0.384 | 1.03  | ENSG00000157193 | LRP8       | protein_coding |
| 0.040206 | 0.384 | 0.288 | ENSG00000197993 | KEL        | protein_coding |
| 0.040263 | 0.384 | 1.012 | ENSG00000100554 | ATP6V1D    | protein_coding |
| 0.040283 | 0.384 | 1.038 | ENSG00000160145 | KALRN      | protein_coding |
| 0.040343 | 0.384 | 1.05  | ENSG00000054983 | GALC       | protein_coding |
| 0.040355 | 0.384 | 0.974 | ENSG00000214293 | RSBN1L-AS1 | lincRNA        |
| 0.040377 | 0.384 | 0.848 | ENSG00000189431 | RASSF10    | protein_coding |
| 0.040454 | 0.385 | 1.063 | ENSG00000187097 | ENTPD5     | protein_coding |
| 0.040523 | 0.385 | 1.018 | ENSG00000154102 | C16orf74   | protein_coding |
| 0.040559 | 0.385 | 0.864 | ENSG00000138468 | SENP7      | protein_coding |
| 0.04057  | 0.385 | 1.161 | ENSG00000177888 | ZBTB41     | protein_coding |
| 0.040588 | 0.385 | 0.946 | ENSG00000112659 | CUL9       | protein_coding |
| 0.040617 | 0.385 | 0.992 | ENSG00000103316 | CRYM       | protein_coding |
| 0.04062  | 0.385 | 1.011 | ENSG00000144118 | RALB       | protein_coding |
| 0.040703 | 0.385 | 1.012 | ENSG00000110880 | CORO1C     | protein_coding |

|          |       |       |                 |              |                      |
|----------|-------|-------|-----------------|--------------|----------------------|
| 0.040788 | 0.386 | 1.036 | ENSG00000099810 | MTAP         | protein_coding       |
| 0.040823 | 0.386 | 0.953 | ENSG00000063180 | CA11         | protein_coding       |
| 0.040885 | 0.386 | 0.288 | ENSG00000167094 | TTC16        | protein_coding       |
| 0.040938 | 0.387 | 1.002 | ENSG00000092199 | HNRNPC       | protein_coding       |
| 0.041003 | 0.387 | 1.109 | ENSG00000069943 | PIGB         | protein_coding       |
| 0.041017 | 0.387 | 1.005 | ENSG00000102007 | PLP2         | protein_coding       |
| 0.041048 | 0.387 | 1.051 | ENSG00000126773 | PCNXL4       | protein_coding       |
| 0.041065 | 0.387 | 0.69  | ENSG00000172673 | THEMIS       | protein_coding       |
| 0.04108  | 0.387 | 0.983 | ENSG00000137486 | ARRB1        | protein_coding       |
| 0.041117 | 0.387 | 1.012 | ENSG00000128951 | DUT          | protein_coding       |
| 0.041161 | 0.387 | 1.105 | ENSG00000173145 | NOC3L        | protein_coding       |
| 0.041179 | 0.387 | 1.007 | ENSG00000138434 | SSFA2        | protein_coding       |
| 0.041185 | 0.387 | 1.021 | ENSG00000232774 | RP11-47I22.3 | lincRNA              |
| 0.041349 | 0.387 | 1.006 | ENSG00000135269 | TES          | protein_coding       |
| 0.041352 | 0.387 | 1.018 | ENSG00000162434 | JAK1         | protein_coding       |
| 0.041354 | 0.387 | 1.121 | ENSG00000183580 | FBXL7        | protein_coding       |
| 0.041361 | 0.387 | 1.011 | ENSG00000137693 | YAP1         | protein_coding       |
| 0.041384 | 0.387 | 0.961 | ENSG00000205744 | DENND1C      | protein_coding       |
| 0.041384 | 0.387 | 1.084 | ENSG00000160447 | PKN3         | protein_coding       |
| 0.041413 | 0.387 | 1.014 | ENSG00000135932 | CAB39        | protein_coding       |
| 0.041462 | 0.387 | 1.011 | ENSG00000104067 | TJP1         | protein_coding       |
| 0.041499 | 0.387 | 1.012 | ENSG00000116132 | PRRX1        | protein_coding       |
| 0.041553 | 0.388 | 1.026 | ENSG00000119979 | FAM45A       | protein_coding       |
| 0.041591 | 0.388 | 1.03  | ENSG00000231290 | APCDD1L-AS1  | processed_transcript |
| 0.041642 | 0.388 | 1.096 | ENSG00000075131 | TIPIN        | protein_coding       |
| 0.041682 | 0.388 | 1.012 | ENSG00000136527 | TRA2B        | protein_coding       |
| 0.041714 | 0.388 | 1.005 | ENSG00000165119 | HNRNPK       | protein_coding       |
| 0.041837 | 0.389 | 1.032 | ENSG00000009335 | UBE3C        | protein_coding       |
| 0.041861 | 0.389 | 0.807 | ENSG00000181754 | AMIGO1       | protein_coding       |
| 0.041882 | 0.389 | 1.042 | ENSG00000101871 | MID1         | protein_coding       |
| 0.041927 | 0.389 | 1.039 | ENSG00000198420 | FAM115A      | protein_coding       |
| 0.041953 | 0.389 | 1.056 | ENSG00000159259 | CHAF1B       | protein_coding       |
| 0.042203 | 0.391 | 1.013 | ENSG00000111726 | CMAS         | protein_coding       |
| 0.042245 | 0.391 | 1.037 | ENSG00000005700 | IBTK         | protein_coding       |
| 0.042265 | 0.391 | 0.891 | ENSG00000113578 | FGF1         | protein_coding       |
| 0.042277 | 0.391 | 0.981 | ENSG00000153551 | CMTM7        | protein_coding       |

|          |       |       |                 |            |                      |
|----------|-------|-------|-----------------|------------|----------------------|
| 0.042287 | 0.391 | 1.019 | ENSG00000014914 | MTMR11     | protein_coding       |
| 0.042289 | 0.391 | 1.035 | ENSG00000184743 | ATL3       | protein_coding       |
| 0.042321 | 0.391 | 0.99  | ENSG00000108465 | CDK5RAP3   | protein_coding       |
| 0.042325 | 0.391 | 1.134 | ENSG00000198788 | MUC2       | processed_transcript |
| 0.042349 | 0.391 | 1.026 | ENSG00000105997 | HOXA3      | protein_coding       |
| 0.042373 | 0.391 | 0.942 | ENSG00000235453 | TOPORS-AS1 | antisense            |
| 0.042465 | 0.391 | 1.062 | ENSG00000196526 | AFAP1      | protein_coding       |
| 0.04256  | 0.392 | 1.033 | ENSG00000095303 | PTGS1      | protein_coding       |
| 0.042609 | 0.392 | 1.013 | ENSG00000111667 | USP5       | protein_coding       |
| 0.042619 | 0.392 | 1.076 | ENSG00000213066 | FGFR1OP    | protein_coding       |
| 0.042649 | 0.392 | 1.062 | ENSG00000112029 | FBXO5      | protein_coding       |
| 0.042669 | 0.392 | 0.963 | ENSG00000118096 | IFT46      | protein_coding       |
| 0.042744 | 0.392 | 1.045 | ENSG00000205413 | SAMD9      | protein_coding       |
| 0.04278  | 0.393 | 1.105 | ENSG00000187642 | C1orf170   | protein_coding       |
| 0.042852 | 0.393 | 1.038 | ENSG00000135636 | DYSF       | protein_coding       |
| 0.042887 | 0.393 | 1.012 | ENSG00000067704 | IARS2      | protein_coding       |
| 0.042918 | 0.393 | 1.006 | ENSG00000167767 | KRT80      | protein_coding       |
| 0.042964 | 0.393 | 0.997 | ENSG00000106565 | TMEM176B   | protein_coding       |
| 0.043036 | 0.393 | 0.926 | ENSG00000069493 | CLEC2D     | protein_coding       |
| 0.043047 | 0.393 | 1.478 | ENSG00000204538 | PSORS1C2   | protein_coding       |
| 0.043071 | 0.393 | 1.022 | ENSG00000012211 | PRICKLE3   | protein_coding       |
| 0.043075 | 0.393 | 1.017 | ENSG00000176619 | LMNB2      | protein_coding       |
| 0.043158 | 0.394 | 1.028 | ENSG00000123268 | ATF1       | protein_coding       |
| 0.043444 | 0.396 | 1.029 | ENSG00000119977 | TCTN3      | protein_coding       |
| 0.043447 | 0.396 | 1.014 | ENSG00000125746 | EML2       | protein_coding       |
| 0.043457 | 0.396 | 0.942 | ENSG00000184515 | BEX5       | protein_coding       |
| 0.043511 | 0.396 | 0.817 | ENSG00000184271 | POU6F1     | protein_coding       |
| 0.043745 | 0.398 | 1.029 | ENSG00000014138 | POLA2      | protein_coding       |
| 0.043818 | 0.398 | 0.993 | ENSG00000188706 | ZDHHC9     | protein_coding       |
| 0.043876 | 0.398 | 1.028 | ENSG00000137411 | VAR2       | protein_coding       |
| 0.04388  | 0.398 | 0.998 | ENSG00000115884 | SDC1       | protein_coding       |
| 0.043925 | 0.398 | 0.97  | ENSG00000180354 | C7orf41    | protein_coding       |
| 0.043932 | 0.398 | 1     | ENSG00000089356 | FXD3       | protein_coding       |
| 0.043933 | 0.398 | 0.93  | ENSG00000067191 | CACNB1     | protein_coding       |
| 0.043951 | 0.398 | 1.024 | ENSG00000140835 | CHST4      | protein_coding       |
| 0.043988 | 0.398 | 0.936 | ENSG00000118971 | CCND2      | protein_coding       |

|          |       |       |                 |                |                      |
|----------|-------|-------|-----------------|----------------|----------------------|
| 0.044202 | 0.4   | 1.012 | ENSG00000198805 | PNP            | protein_coding       |
| 0.044229 | 0.4   | 1.196 | ENSG00000102098 | SCML2          | protein_coding       |
| 0.044377 | 0.401 | 0.995 | ENSG00000169692 | AGPAT2         | protein_coding       |
| 0.044406 | 0.401 | 1.009 | ENSG00000124260 | MAGEA10        | protein_coding       |
| 0.044423 | 0.401 | 1.031 | ENSG00000117133 | RPF1           | protein_coding       |
| 0.044464 | 0.401 | 0.993 | ENSG00000076864 | RAP1GAP        | protein_coding       |
| 0.044592 | 0.402 | 1.043 | ENSG00000051382 | PIK3CB         | protein_coding       |
| 0.044597 | 0.402 | 1.016 | ENSG00000183431 | SF3A3          | protein_coding       |
| 0.044626 | 0.402 | 0.964 | ENSG00000135211 | TMEM60         | protein_coding       |
| 0.044743 | 0.402 | 1.043 | ENSG00000095539 | SEMA4G         | protein_coding       |
| 0.044752 | 0.402 | 1.064 | ENSG00000164134 | NAA15          | protein_coding       |
| 0.044787 | 0.402 | 0.98  | ENSG00000124098 | FAM210B        | protein_coding       |
| 0.044791 | 0.402 | 0.971 | ENSG00000184162 | NR2C2AP        | protein_coding       |
| 0.044793 | 0.402 | 0.768 | ENSG00000187889 | C1orf168       | protein_coding       |
| 0.044861 | 0.402 | 0.936 | ENSG00000126460 | PRRG2          | protein_coding       |
| 0.044876 | 0.402 | 0.992 | ENSG00000204219 | TCEA3          | protein_coding       |
| 0.044928 | 0.403 | 1.047 | ENSG00000106665 | CLIP2          | protein_coding       |
| 0.044974 | 0.403 | 0.979 | ENSG00000186635 | ARAP1          | protein_coding       |
| 0.044982 | 0.403 | 0.825 | ENSG00000177272 | KCNA3          | protein_coding       |
| 0.045074 | 0.403 | 0.967 | ENSG00000119523 | ALG2           | protein_coding       |
| 0.045099 | 0.403 | 1.356 | ENSG00000205293 | RP11-1112C15.1 | lincRNA              |
| 0.045138 | 0.403 | 1.009 | ENSG00000113758 | DBN1           | protein_coding       |
| 0.045222 | 0.404 | 1.035 | ENSG00000158234 | FAIM           | protein_coding       |
| 0.0453   | 0.404 | 0.905 | ENSG00000184857 | TMEM186        | protein_coding       |
| 0.045304 | 0.404 | 1.087 | ENSG00000151116 | UEVLD          | protein_coding       |
| 0.045315 | 0.404 | 1.01  | ENSG00000170606 | HSPA4          | protein_coding       |
| 0.045343 | 0.404 | 0.853 | ENSG00000227733 | RP4-565E6.1    | lincRNA              |
| 0.045384 | 0.404 | 1.003 | ENSG00000115461 | IGFBP5         | protein_coding       |
| 0.04539  | 0.404 | 1.003 | ENSG00000159131 | GART           | protein_coding       |
| 0.045421 | 0.404 | 0.966 | ENSG00000183762 | KREMEN1        | protein_coding       |
| 0.045613 | 0.405 | 1.03  | ENSG00000076382 | SPAG5          | protein_coding       |
| 0.045845 | 0.407 | 0.953 | ENSG00000103160 | HSDL1          | protein_coding       |
| 0.045852 | 0.407 | 1.007 | ENSG00000184113 | CLDN5          | protein_coding       |
| 0.045854 | 0.407 | 1.017 | ENSG00000189223 | AC016683.6     | processed_transcript |
| 0.046009 | 0.408 | 1.024 | ENSG00000180776 | ZDHHC20        | protein_coding       |
| 0.046108 | 0.408 | 1.07  | ENSG00000142731 | PLK4           | protein_coding       |



|          |       |       |                  |           |                |
|----------|-------|-------|------------------|-----------|----------------|
| 0.046132 | 0.408 | 0.93  | ENSG00000010671  | BTK       | protein_coding |
| 0.046215 | 0.409 | 0.956 | ENSG000000179583 | CIITA     | protein_coding |
| 0.046247 | 0.409 | 1.017 | ENSG00000015676  | NUDCD3    | protein_coding |
| 0.046254 | 0.409 | 0.977 | ENSG00000103365  | GGA2      | protein_coding |
| 0.046331 | 0.409 | 1.047 | ENSG00000051180  | RAD51     | protein_coding |
| 0.046383 | 0.409 | 0.929 | ENSG00000228221  | LINC00578 | lincRNA        |
| 0.046418 | 0.409 | 1.021 | ENSG00000109133  | TMEM33    | protein_coding |
| 0.046458 | 0.409 | 0.998 | ENSG00000166562  | SEC11C    | protein_coding |
| 0.046472 | 0.409 | 1.004 | ENSG00000188313  | PLSCR1    | protein_coding |
| 0.046475 | 0.409 | 0.998 | ENSG00000122133  | PAEP      | protein_coding |
| 0.04656  | 0.41  | 1.085 | ENSG00000165671  | NSD1      | protein_coding |
| 0.046573 | 0.41  | 1.096 | ENSG00000100815  | TRIP11    | protein_coding |
| 0.046631 | 0.41  | 0.85  | ENSG00000242732  | RGAG4     | protein_coding |
| 0.046641 | 0.41  | 1.017 | ENSG00000090776  | EFNB1     | protein_coding |
| 0.046647 | 0.41  | 1.014 | ENSG00000106049  | HIBADH    | protein_coding |
| 0.046783 | 0.411 | 1     | ENSG00000171557  | FGG       | protein_coding |
| 0.046884 | 0.411 | 0.871 | ENSG00000142621  | FHAD1     | protein_coding |
| 0.046885 | 0.411 | 1.025 | ENSG00000007168  | PAFAH1B1  | protein_coding |
| 0.046948 | 0.411 | 1.132 | ENSG00000162390  | ACOT11    | protein_coding |
| 0.046995 | 0.411 | 1.001 | ENSG00000196531  | NACA      | protein_coding |
| 0.047023 | 0.411 | 1.002 | ENSG00000164111  | ANXA5     | protein_coding |
| 0.047088 | 0.412 | 1.065 | ENSG00000053770  | AP5M1     | protein_coding |
| 0.047147 | 0.412 | 1.006 | ENSG00000106263  | EIF3B     | protein_coding |
| 0.047183 | 0.412 | 0.848 | ENSG00000159387  | IRX6      | protein_coding |
| 0.047313 | 0.413 | 1.028 | ENSG00000164163  | ABCE1     | protein_coding |
| 0.047333 | 0.413 | 0.95  | ENSG00000143373  | ZNF687    | protein_coding |
| 0.047411 | 0.413 | 1.067 | ENSG00000113838  | TBCCD1    | protein_coding |
| 0.047611 | 0.414 | 1.012 | ENSG00000221926  | TRIM16    | protein_coding |
| 0.047664 | 0.414 | 1.014 | ENSG00000181222  | POLR2A    | protein_coding |
| 0.047673 | 0.414 | 1.029 | ENSG00000111266  | DUSP16    | protein_coding |
| 0.047683 | 0.414 | 1.015 | ENSG00000185100  | ADSSL1    | protein_coding |
| 0.047702 | 0.414 | 1.008 | ENSG00000115590  | IL1R2     | protein_coding |
| 0.047742 | 0.414 | 1.047 | ENSG00000134775  | FHOD3     | protein_coding |
| 0.047751 | 0.414 | 1.113 | ENSG00000000460  | C1orf112  | protein_coding |
| 0.047755 | 0.414 | 1.014 | ENSG00000082898  | XPO1      | protein_coding |
| 0.04777  | 0.414 | 1.006 | ENSG00000116161  | CACYBP    | protein_coding |

|          |       |       |                 |            |                |
|----------|-------|-------|-----------------|------------|----------------|
| 0.047775 | 0.414 | 0.959 | ENSG00000141428 | C18orf21   | protein_coding |
| 0.047852 | 0.414 | 0.864 | ENSG00000183918 | SH2D1A     | protein_coding |
| 0.047855 | 0.414 | 1.051 | ENSG00000133056 | PIK3C2B    | protein_coding |
| 0.04786  | 0.414 | 1.008 | ENSG00000077147 | TM9SF3     | protein_coding |
| 0.047881 | 0.414 | 1.086 | ENSG00000223725 | AC007879.5 | antisense      |
| 0.047912 | 0.414 | 1.037 | ENSG00000004961 | HCCS       | protein_coding |
| 0.047927 | 0.414 | 1.12  | ENSG00000112761 | WISP3      | protein_coding |
| 0.04793  | 0.414 | 0.833 | ENSG00000126218 | F10        | protein_coding |
| 0.047957 | 0.414 | 1.058 | ENSG00000109184 | DCUN1D4    | protein_coding |
| 0.04814  | 0.415 | 1.155 | ENSG00000172728 | FUT10      | protein_coding |
| 0.048209 | 0.415 | 1.084 | ENSG00000162623 | TYW3       | protein_coding |
| 0.048212 | 0.415 | 1.005 | ENSG00000115091 | ACTR3      | protein_coding |
| 0.048218 | 0.415 | 0.968 | ENSG00000119411 | BSPRY      | protein_coding |
| 0.048237 | 0.415 | 1.002 | ENSG00000150753 | CCT5       | protein_coding |
| 0.048358 | 0.416 | 1.027 | ENSG00000122547 | EEDP1      | protein_coding |
| 0.04844  | 0.416 | 1.073 | ENSG00000138092 | CENPO      | protein_coding |
| 0.048452 | 0.416 | 0.913 | ENSG00000177570 | SAMD12     | protein_coding |
| 0.048458 | 0.416 | 1.006 | ENSG00000069275 | NUCKS1     | protein_coding |
| 0.048478 | 0.416 | 1.004 | ENSG00000142227 | EMP3       | protein_coding |
| 0.048505 | 0.416 | 0.989 | ENSG00000102096 | PIM2       | protein_coding |
| 0.048514 | 0.416 | 0.916 | ENSG00000120616 | EPC1       | protein_coding |
| 0.048572 | 0.416 | 1.02  | ENSG00000137404 | NRM        | protein_coding |
| 0.048785 | 0.418 | 1.01  | ENSG00000188486 | H2AFX      | protein_coding |
| 0.048803 | 0.418 | 1.072 | ENSG00000214193 | SH3D21     | protein_coding |
| 0.048868 | 0.418 | 0.943 | ENSG00000169302 | STK32A     | protein_coding |
| 0.048881 | 0.418 | 0.969 | ENSG00000156873 | PHKG2      | protein_coding |
| 0.048897 | 0.418 | 1.037 | ENSG00000164253 | WDR41      | protein_coding |
| 0.048956 | 0.418 | 0.981 | ENSG00000132254 | ARFIP2     | protein_coding |
| 0.048978 | 0.418 | 1.001 | ENSG00000112378 | PERP       | protein_coding |
| 0.048989 | 0.418 | 1.065 | ENSG00000120334 | CENPL      | protein_coding |
| 0.048999 | 0.418 | 0.95  | ENSG00000214413 | BBIP1      | protein_coding |
| 0.049053 | 0.418 | 0.942 | ENSG00000197620 | CXorf40A   | protein_coding |
| 0.049122 | 0.418 | 0.94  | ENSG00000143297 | FCRL5      | protein_coding |
| 0.049204 | 0.419 | 1.01  | ENSG00000010292 | NCAPD2     | protein_coding |
| 0.049405 | 0.419 | 1.062 | ENSG00000124257 | NEURL2     | protein_coding |
| 0.049415 | 0.419 | 1.025 | ENSG00000089154 | GCN1L1     | protein_coding |

|          |       |       |                 |             |                |
|----------|-------|-------|-----------------|-------------|----------------|
| 0.049422 | 0.419 | 0.963 | ENSG00000141627 | DYM         | protein_coding |
| 0.049428 | 0.419 | 1.005 | ENSG00000153187 | HNRNPU      | protein_coding |
| 0.049446 | 0.419 | 0.951 | ENSG00000182866 | LCK         | protein_coding |
| 0.049468 | 0.419 | 1.013 | ENSG00000117868 | ESYT2       | protein_coding |
| 0.049489 | 0.419 | 0.977 | ENSG00000143393 | PI4KB       | protein_coding |
| 0.049593 | 0.419 | 1.039 | ENSG00000087116 | ADAMTS2     | protein_coding |
| 0.049593 | 0.419 | 1.007 | ENSG00000011304 | PTBP1       | protein_coding |
| 0.049624 | 0.419 | 1.023 | ENSG00000242247 | ARFGAP3     | protein_coding |
| 0.049632 | 0.419 | 0.901 | ENSG00000124772 | CPNE5       | protein_coding |
| 0.04964  | 0.419 | 0.895 | ENSG00000094841 | UPRT        | protein_coding |
| 0.049644 | 0.419 | 1.039 | ENSG00000153214 | TMEM87B     | protein_coding |
| 0.049671 | 0.419 | 1.04  | ENSG00000054611 | TBC1D22A    | protein_coding |
| 0.049716 | 0.419 | 0.483 | ENSG00000243627 | AP000322.53 | protein_coding |
| 0.049756 | 0.419 | 1.012 | ENSG00000084463 | WBP11       | protein_coding |
| 0.049794 | 0.42  | 0.901 | ENSG00000106993 | CDC37L1     | protein_coding |
| 0.049852 | 0.42  | 1.023 | ENSG00000126746 | ZNF384      | protein_coding |
| 0.049984 | 0.421 | 0.988 | ENSG00000141504 | SAT2        | protein_coding |
| 0.049998 | 0.421 | 0.909 | ENSG00000143315 | PIGM        | protein_coding |

**Supplemental Table 5:** Multivariate Cox proportional hazards model after forward selection stepwise regression in TCGA Cohort I

|                             | Hazard Ratio<br>(95% CI) | Likelihood ratio<br>p-value |
|-----------------------------|--------------------------|-----------------------------|
| ENSG00000104140 (RHOV)      | 1.011 (1.006-1.016)      | 4.35E-06                    |
| ENSG00000156535 (CD109)     | 1.068 (1.028-1.109)      | 0.00069                     |
| ENSG00000235884 (LINC00941) | 1.177 (1.063-1.304)      | 0.0018                      |
| ENSG00000156869 (FRRS1)     | 1.075 (1.015-1.139)      | 0.0142                      |

**Supplemental Table 6:** Top 100 up-regulated and top 100 down-regulated genes in High Risk tumors

| <b>Name</b>   | <b>Low Risk</b> | <b>High Risk</b> | <b>FC</b> | <b>FDR</b> |
|---------------|-----------------|------------------|-----------|------------|
| KRT14         | 1.03            | 22.55            | 21.99     | 0.04       |
| S100A7        | 1.39            | 15.82            | 11.37     | 0.03       |
| KRT6B         | 1.22            | 13.54            | 11.10     | 0.01       |
| ANXA8         | 0.97            | 9.63             | 9.89      | 0          |
| DSC3          | 0.24            | 2.37             | 9.76      | 0.04       |
| RP11-77I22.3  | 0.30            | 2.88             | 9.56      | 0          |
| PI3           | 6.28            | 58.66            | 9.34      | 0          |
| ANXA8L1       | 0.87            | 7.99             | 9.20      | 0          |
| ANXA8L2       | 1.20            | 10.44            | 8.69      | 0          |
| KRT16         | 3.60            | 31.27            | 8.68      | 0.01       |
| IL1A          | 0.42            | 3.56             | 8.51      | 0.02       |
| RP11-314P12.3 | 0.97            | 7.78             | 8.04      | 0          |
| RSPO3         | 1.47            | 11.68            | 7.95      | 0          |
| RHOV          | 7.11            | 45.63            | 6.41      | 0          |
| KRT6A         | 20.59           | 130.62           | 6.34      | 0.02       |
| LYPD3         | 4.94            | 31.24            | 6.33      | 0          |
| DKK1          | 5.76            | 35.84            | 6.23      | 0          |
| SERPINB5      | 2.77            | 17.20            | 6.20      | 0          |
| TNS4          | 3.95            | 23.95            | 6.06      | 0          |
| TFF1          | 81.08           | 480.22           | 5.92      | 0.03       |
| KLK7          | 1.48            | 8.76             | 5.90      | 0.03       |
| AL591684.1    | 0.41            | 2.34             | 5.72      | 0          |
| AL603965.1    | 0.49            | 2.79             | 5.71      | 0          |
| GJB3          | 3.30            | 18.20            | 5.52      | 0          |
| RP11-10A14.5  | 0.90            | 4.95             | 5.52      | 0          |
| DNER          | 1.28            | 7.03             | 5.49      | 0          |
| IL20RB        | 2.14            | 11.34            | 5.31      | 0          |
| TRIM29        | 8.03            | 40.70            | 5.07      | 0          |
| KRT6C         | 0.70            | 3.52             | 5.05      | 0.03       |
| GRAMD1B       | 1.37            | 6.87             | 5.01      | 0          |
| S100A12       | 1.03            | 5.13             | 4.99      | 0.04       |
| FOSL1         | 4.51            | 21.82            | 4.84      | 0          |
| FAM83B        | 0.41            | 1.95             | 4.71      | 0          |
| LINC00460     | 2.30            | 10.78            | 4.69      | 0.02       |
| PTPRN         | 0.91            | 4.25             | 4.65      | 0.03       |
| SERPINB3      | 3.78            | 17.41            | 4.60      | 0.05       |
| CD109         | 2.28            | 10.51            | 4.60      | 0          |
| GJB5          | 1.19            | 5.44             | 4.58      | 0          |
| POPDC3        | 1.19            | 5.46             | 4.58      | 0          |
| KLK6          | 3.76            | 17.16            | 4.56      | 0.02       |
| CTD-2354A18.1 | 0.85            | 3.84             | 4.52      | 0.04       |
| KYNU          | 11.95           | 53.10            | 4.44      | 0          |
| ESRG          | 1.02            | 4.47             | 4.39      | 0.01       |
| RP11-309L24.6 | 0.94            | 3.98             | 4.26      | 0.02       |
| SPRR1B        | 11.45           | 48.69            | 4.25      | 0          |
| NCCRP1        | 2.44            | 10.27            | 4.21      | 0.04       |
| RP3-523K23.2  | 0.77            | 3.22             | 4.21      | 0          |
| CYP24A1       | 24.12           | 100.91           | 4.18      | 0.03       |

|              |       |        |      |      |
|--------------|-------|--------|------|------|
| AKAP12       | 4.56  | 19.06  | 4.18 | 0.02 |
| FLNC         | 1.63  | 6.76   | 4.16 | 0.01 |
| MFI2         | 4.40  | 18.30  | 4.16 | 0    |
| ABCC2        | 1.97  | 8.18   | 4.16 | 0    |
| LAMC2        | 33.85 | 139.49 | 4.12 | 0    |
| KRT17        | 35.38 | 145.76 | 4.12 | 0    |
| VNN1         | 1.74  | 7.15   | 4.10 | 0.02 |
| FZD10        | 1.34  | 5.42   | 4.05 | 0.03 |
| PTPRR        | 0.99  | 3.96   | 3.98 | 0.05 |
| HMGA2        | 3.71  | 14.76  | 3.97 | 0.01 |
| FAM25C       | 0.85  | 3.36   | 3.95 | 0    |
| ELOVL3       | 0.55  | 2.16   | 3.93 | 0.01 |
| GABRP        | 7.47  | 29.29  | 3.92 | 0.03 |
| FIBCD1       | 0.92  | 3.54   | 3.85 | 0    |
| VEGFC        | 2.70  | 10.35  | 3.83 | 0    |
| FOXE1        | 0.64  | 2.45   | 3.83 | 0.02 |
| PRSS3        | 6.14  | 23.49  | 3.82 | 0.04 |
| LGALS4       | 35.75 | 136.24 | 3.81 | 0.04 |
| CXCL5        | 5.85  | 22.02  | 3.76 | 0.05 |
| SLC15A1      | 0.77  | 2.90   | 3.75 | 0.01 |
| SPOCD1       | 2.24  | 8.41   | 3.75 | 0.01 |
| ARNTL2       | 4.58  | 16.89  | 3.69 | 0    |
| RP11-64D22.2 | 0.53  | 1.93   | 3.64 | 0    |
| CREG2        | 0.57  | 2.04   | 3.61 | 0    |
| S1PR5        | 0.33  | 1.18   | 3.61 | 0.02 |
| TCN1         | 15.14 | 54.59  | 3.60 | 0.03 |
| CDA          | 13.39 | 48.01  | 3.59 | 0    |
| USH1C        | 2.41  | 8.37   | 3.47 | 0.05 |
| SLC16A1      | 4.31  | 14.96  | 3.47 | 0    |
| SERPINA3     | 36.41 | 125.34 | 3.44 | 0    |
| AL391137.1   | 0.47  | 1.61   | 3.42 | 0.01 |
| GPR115       | 1.11  | 3.76   | 3.40 | 0    |
| LINC00313    | 0.73  | 2.46   | 3.38 | 0.01 |
| CA12         | 6.43  | 21.49  | 3.34 | 0    |
| TM4SF19      | 2.38  | 7.83   | 3.29 | 0    |
| COL7A1       | 2.92  | 9.55   | 3.27 | 0    |
| COL17A1      | 9.89  | 32.29  | 3.26 | 0.01 |
| LETM2        | 3.57  | 11.64  | 3.26 | 0    |
| CLMP         | 2.57  | 8.36   | 3.26 | 0    |
| LAMA3        | 14.52 | 47.25  | 3.26 | 0    |
| SPOCK1       | 2.35  | 7.66   | 3.25 | 0.02 |
| PCSK9        | 1.86  | 6.02   | 3.24 | 0    |
| SPRR2D       | 2.93  | 9.33   | 3.19 | 0.04 |
| GPR1         | 0.30  | 0.94   | 3.18 | 0    |
| ITGA5        | 21.50 | 68.21  | 3.17 | 0    |
| GBP6         | 0.83  | 2.58   | 3.11 | 0.04 |
| RP11-48O20.4 | 2.22  | 6.81   | 3.06 | 0.04 |
| KLRC2        | 0.61  | 1.87   | 3.05 | 0.03 |
| TMEM171      | 0.95  | 2.87   | 3.03 | 0    |
| SERPINA5     | 1.54  | 4.63   | 3.01 | 0    |
| TNFRSF6B     | 7.19  | 21.58  | 3.00 | 0.02 |
| AP000695.4   | 0.55  | 1.65   | 2.98 | 0    |
| PCSK2        | 68.01 | 1.01   | 0.01 | 0    |

|                |         |        |      |      |
|----------------|---------|--------|------|------|
| KLK12          | 79.78   | 1.81   | 0.02 | 0    |
| NNAT           | 9.84    | 0.34   | 0.03 | 0.03 |
| TMEM59L        | 25.12   | 2.37   | 0.09 | 0    |
| KLK13          | 8.50    | 0.89   | 0.11 | 0    |
| THBS4          | 10.89   | 1.15   | 0.11 | 0    |
| CHIA           | 19.16   | 2.05   | 0.11 | 0    |
| KLK14          | 20.18   | 2.26   | 0.11 | 0    |
| SCGB3A2        | 1553.96 | 177.60 | 0.11 | 0    |
| GFRA3          | 12.60   | 1.46   | 0.12 | 0    |
| WIF1           | 28.88   | 3.38   | 0.12 | 0    |
| CHAD           | 3.50    | 0.43   | 0.12 | 0    |
| CRLF1          | 111.10  | 13.63  | 0.12 | 0    |
| RET            | 3.10    | 0.39   | 0.13 | 0    |
| C16orf89       | 258.62  | 32.76  | 0.13 | 0    |
| UCN3           | 10.28   | 1.34   | 0.13 | 0.01 |
| NPTX1          | 7.28    | 0.97   | 0.13 | 0    |
| NOTUM          | 12.72   | 1.72   | 0.14 | 0.01 |
| HSD17B13       | 1.63    | 0.22   | 0.14 | 0    |
| IGLV9-49       | 152.76  | 21.13  | 0.14 | 0.03 |
| SCGB3A1        | 1083.87 | 151.91 | 0.14 | 0    |
| GKN2           | 37.83   | 5.52   | 0.15 | 0    |
| PCP4           | 54.30   | 7.96   | 0.15 | 0    |
| BAI1           | 2.63    | 0.42   | 0.16 | 0    |
| RP11-259K15.2  | 4.10    | 0.69   | 0.17 | 0    |
| SHISA3         | 14.34   | 2.50   | 0.17 | 0    |
| BRDT           | 3.99    | 0.70   | 0.17 | 0    |
| RP11-279F6.1   | 11.23   | 2.00   | 0.18 | 0    |
| TNNC2          | 17.30   | 3.15   | 0.18 | 0    |
| RP11-318M2.3   | 2.89    | 0.53   | 0.18 | 0    |
| BAALC          | 7.88    | 1.51   | 0.19 | 0    |
| MTMR7          | 3.80    | 0.73   | 0.19 | 0.01 |
| RP11-262H14.10 | 2.62    | 0.51   | 0.19 | 0    |
| GGTLC1         | 24.62   | 4.78   | 0.19 | 0    |
| CYP4B1         | 71.15   | 13.97  | 0.20 | 0    |
| APOH           | 11.01   | 2.16   | 0.20 | 0    |
| AC132217.4     | 33.79   | 6.91   | 0.20 | 0.01 |
| AC010136.2     | 7.89    | 1.62   | 0.21 | 0    |
| RP11-896J10.3  | 7.42    | 1.52   | 0.21 | 0    |
| CACNA2D2       | 15.30   | 3.17   | 0.21 | 0    |
| TSPAN11        | 7.55    | 1.57   | 0.21 | 0    |
| AL359473.1     | 1119.89 | 233.00 | 0.21 | 0.01 |
| LILRA2         | 7.52    | 1.63   | 0.22 | 0    |
| RP5-1174J21.1  | 22.17   | 4.87   | 0.22 | 0.01 |
| GSTA2          | 8.42    | 1.87   | 0.22 | 0.01 |
| PITX2          | 5.50    | 1.22   | 0.22 | 0    |
| SLC1A7         | 15.23   | 3.43   | 0.23 | 0    |
| NKD1           | 3.10    | 0.71   | 0.23 | 0    |
| IGLVI-70       | 6.78    | 1.59   | 0.23 | 0.01 |
| CIT            | 37.59   | 8.84   | 0.24 | 0    |
| CRYM           | 28.15   | 6.67   | 0.24 | 0    |
| AC008537.2     | 54.98   | 13.06  | 0.24 | 0    |
| HOXD1          | 7.79    | 1.87   | 0.24 | 0    |
| AC026471.6     | 3.22    | 0.79   | 0.25 | 0    |

|               |         |        |      |      |
|---------------|---------|--------|------|------|
| GPR98         | 4.52    | 1.14   | 0.25 | 0    |
| PGC           | 603.11  | 153.22 | 0.25 | 0.02 |
| PTCSC3        | 2.98    | 0.76   | 0.25 | 0    |
| SLC46A2       | 4.49    | 1.16   | 0.26 | 0    |
| DPP10         | 2.12    | 0.55   | 0.26 | 0    |
| HOPX          | 501.48  | 130.02 | 0.26 | 0    |
| AC131056.5    | 6.57    | 1.71   | 0.26 | 0    |
| KHDRBS2       | 1.81    | 0.47   | 0.26 | 0    |
| AC011293.1    | 75.19   | 19.85  | 0.26 | 0.04 |
| ZNF385B       | 9.23    | 2.46   | 0.27 | 0    |
| NGF           | 2.78    | 0.75   | 0.27 | 0    |
| BMP3          | 6.88    | 1.85   | 0.27 | 0    |
| PEBP4         | 46.98   | 12.70  | 0.27 | 0    |
| NPAS3         | 1.97    | 0.54   | 0.27 | 0    |
| PLA2G1B       | 10.73   | 2.96   | 0.28 | 0    |
| SFTA3         | 171.20  | 47.27  | 0.28 | 0    |
| Metazoa_SRP   | 10.36   | 2.88   | 0.28 | 0    |
| IGFBP2        | 283.44  | 79.10  | 0.28 | 0    |
| MST1P9        | 13.87   | 3.91   | 0.28 | 0    |
| AC013718.1    | 3.92    | 1.11   | 0.28 | 0    |
| CTD-2531D15.4 | 4.82    | 1.36   | 0.28 | 0    |
| FAM182A       | 0.73    | 0.21   | 0.29 | 0    |
| TMEM213       | 1.71    | 0.49   | 0.29 | 0    |
| CUZD1         | 1.08    | 0.32   | 0.29 | 0    |
| FGF18         | 1.62    | 0.48   | 0.30 | 0    |
| C4BPA         | 150.02  | 44.40  | 0.30 | 0    |
| AC008268.1    | 5.78    | 1.72   | 0.30 | 0    |
| MYBPHL        | 5.33    | 1.60   | 0.30 | 0    |
| SCUBE2        | 10.23   | 3.07   | 0.30 | 0    |
| RNY3P8        | 27.37   | 8.24   | 0.30 | 0    |
| FDCSP         | 14.79   | 4.48   | 0.30 | 0    |
| TMEM108       | 7.44    | 2.26   | 0.30 | 0    |
| GFRA1         | 0.90    | 0.28   | 0.31 | 0    |
| ZDHHC11B      | 4.92    | 1.51   | 0.31 | 0    |
| LRP2          | 4.53    | 1.41   | 0.31 | 0    |
| NAPSA         | 1445.42 | 450.89 | 0.31 | 0    |
| SCNN1G        | 5.78    | 1.81   | 0.31 | 0    |
| ADH1C         | 23.08   | 7.25   | 0.31 | 0.04 |
| SLC26A9       | 16.18   | 5.09   | 0.31 | 0    |
| SFTA1P        | 33.14   | 10.43  | 0.31 | 0    |
| SFTPD         | 193.60  | 61.13  | 0.32 | 0    |
| ALOX15B       | 27.77   | 8.77   | 0.32 | 0    |
| SYBU          | 21.04   | 6.66   | 0.32 | 0    |
| MYOZ1         | 2.07    | 0.66   | 0.32 | 0    |
| TDRD10        | 3.40    | 1.10   | 0.32 | 0    |
| SCTR          | 14.03   | 4.55   | 0.32 | 0    |



**Supplemental Table 7:** PantherDB annotation analysis of genes differentially up-regulated in High Risk tumors

Analysis Type: PANTHER Overrepresentation Test (release 20150430)  
 Annotation Version and Release Date: PANTHER version 10.0 Released 2015-05-15  
 Analyzed List: up regulated in high risk for PantherDB 07232015.csv (Homo sapiens)  
 Reference List: Homo sapiens (all genes in database)  
 Bonferroni correction: TRUE

| PANTHER GO-Slim Biological Process                              | Homo sapiens -  | up regulated in high risk for PantherDB 07232015.csv (257) |          |            |                 |          |
|-----------------------------------------------------------------|-----------------|------------------------------------------------------------|----------|------------|-----------------|----------|
|                                                                 | REFLIST (20814) | #                                                          | expected | over/under | fold Enrichment | P-value  |
| Unclassified                                                    | 8629            | 79                                                         | 106.55   | -          | 0.74            | 0.00E+00 |
| developmental process                                           | 2456            | 61                                                         | 30.33    | +          | 2.01            | 1.61E-05 |
| immune system process                                           | 1391            | 38                                                         | 17.18    | +          | 2.21            | 8.74E-04 |
| cell communication                                              | 3006            | 64                                                         | 37.12    | +          | 1.72            | 1.53E-03 |
| macrophage activation                                           | 167             | 11                                                         | 2.06     | +          | > 5             | 2.10E-03 |
| system development                                              | 1271            | 33                                                         | 15.69    | +          | 2.1             | 1.09E-02 |
| cellular process                                                | 6708            | 113                                                        | 82.83    | +          | 1.36            | 1.21E-02 |
| mesoderm development                                            | 671             | 21                                                         | 8.29     | +          | 2.53            | 2.42E-02 |
| angiogenesis                                                    | 198             | 10                                                         | 2.44     | +          | 4.09            | 4.65E-02 |
| ectoderm development                                            | 663             | 20                                                         | 8.19     | +          | 2.44            | 5.67E-02 |
| response to stimulus                                            | 2170            | 45                                                         | 26.79    | +          | 1.68            | 8.58E-02 |
| heart development                                               | 181             | 9                                                          | 2.23     | +          | 4.03            | 1.07E-01 |
| immune response                                                 | 518             | 16                                                         | 6.4      | +          | 2.5             | 1.83E-01 |
| anatomical structure morphogenesis                              | 596             | 17                                                         | 7.36     | +          | 2.31            | 2.98E-01 |
| cell killing                                                    | 8               | 2                                                          | 0.1      | +          | > 5             | 1.00E+00 |
| ferredoxin metabolic process                                    | 8               | 1                                                          | 0.1      | +          | > 5             | 1.00E+00 |
| behavior                                                        | 20              | 2                                                          | 0.25     | +          | > 5             | 1.00E+00 |
| regulation of sequence-specific DNA binding transcription facto | 15              | 1                                                          | 0.19     | +          | > 5             | 1.00E+00 |
| dorsal/ventral axis specification                               | 32              | 2                                                          | 0.4      | +          | > 5             | 1.00E+00 |
| locomotion                                                      | 65              | 4                                                          | 0.8      | +          | 4.98            | 1.00E+00 |
| neuron-neuron synaptic transmission                             | 52              | 3                                                          | 0.64     | +          | 4.67            | 1.00E+00 |
| regulation of liquid surface tension                            | 56              | 3                                                          | 0.69     | +          | 4.34            | 1.00E+00 |
| cellular calcium ion homeostasis                                | 38              | 2                                                          | 0.47     | +          | 4.26            | 1.00E+00 |
| response to biotic stimulus                                     | 41              | 2                                                          | 0.51     | +          | 3.95            | 1.00E+00 |
| cell proliferation                                              | 103             | 5                                                          | 1.27     | +          | 3.93            | 1.00E+00 |
| synaptic vesicle exocytosis                                     | 71              | 3                                                          | 0.88     | +          | 3.42            | 1.00E+00 |
| porphyrin-containing compound metabolic process                 | 27              | 1                                                          | 0.33     | +          | 3               | 1.00E+00 |
| blood coagulation                                               | 168             | 6                                                          | 2.07     | +          | 2.89            | 1.00E+00 |
| B cell mediated immunity                                        | 141             | 5                                                          | 1.74     | +          | 2.87            | 1.00E+00 |

|                                                |      |    |       |   |      |          |
|------------------------------------------------|------|----|-------|---|------|----------|
| extracellular transport                        | 113  | 4  | 1.4   | + | 2.87 | 1.00E+00 |
| nuclear transport                              | 85   | 3  | 1.05  | + | 2.86 | 1.00E+00 |
| vitamin transport                              | 59   | 2  | 0.73  | + | 2.75 | 1.00E+00 |
| cell-matrix adhesion                           | 89   | 3  | 1.1   | + | 2.73 | 1.00E+00 |
| blood circulation                              | 154  | 5  | 1.9   | + | 2.63 | 1.00E+00 |
| respiratory electron transport chain           | 217  | 7  | 2.68  | + | 2.61 | 1.00E+00 |
| DNA replication                                | 161  | 5  | 1.99  | + | 2.52 | 1.00E+00 |
| induction of apoptosis                         | 129  | 4  | 1.59  | + | 2.51 | 1.00E+00 |
| pattern specification process                  | 196  | 6  | 2.42  | + | 2.48 | 1.00E+00 |
| fatty acid metabolic process                   | 202  | 6  | 2.49  | + | 2.41 | 1.00E+00 |
| receptor-mediated endocytosis                  | 205  | 6  | 2.53  | + | 2.37 | 1.00E+00 |
| response to external stimulus                  | 378  | 11 | 4.67  | + | 2.36 | 1.00E+00 |
| anion transport                                | 173  | 5  | 2.14  | + | 2.34 | 1.00E+00 |
| cellular component movement                    | 476  | 13 | 5.88  | + | 2.21 | 1.00E+00 |
| embryo development                             | 150  | 4  | 1.85  | + | 2.16 | 1.00E+00 |
| response to interferon-gamma                   | 39   | 1  | 0.48  | + | 2.08 | 1.00E+00 |
| generation of precursor metabolites and energy | 274  | 7  | 3.38  | + | 2.07 | 1.00E+00 |
| cellular component morphogenesis               | 478  | 12 | 5.9   | + | 2.03 | 1.00E+00 |
| cholesterol metabolic process                  | 83   | 2  | 1.02  | + | 1.95 | 1.00E+00 |
| homeostatic process                            | 209  | 5  | 2.58  | + | 1.94 | 1.00E+00 |
| biological adhesion                            | 606  | 14 | 7.48  | + | 1.87 | 1.00E+00 |
| cell-cell adhesion                             | 391  | 9  | 4.83  | + | 1.86 | 1.00E+00 |
| protein glycosylation                          | 174  | 4  | 2.15  | + | 1.86 | 1.00E+00 |
| glycogen metabolic process                     | 87   | 2  | 1.07  | + | 1.86 | 1.00E+00 |
| response to stress                             | 659  | 15 | 8.14  | + | 1.84 | 1.00E+00 |
| purine nucleobase metabolic process            | 88   | 2  | 1.09  | + | 1.84 | 1.00E+00 |
| cell adhesion                                  | 579  | 13 | 7.15  | + | 1.82 | 1.00E+00 |
| steroid metabolic process                      | 179  | 4  | 2.21  | + | 1.81 | 1.00E+00 |
| complement activation                          | 45   | 1  | 0.56  | + | 1.8  | 1.00E+00 |
| regulation of molecular function               | 1096 | 24 | 13.53 | + | 1.77 | 1.00E+00 |
| nervous system development                     | 823  | 18 | 10.16 | + | 1.77 | 1.00E+00 |
| lipid transport                                | 322  | 7  | 3.98  | + | 1.76 | 1.00E+00 |
| sulfur compound metabolic process              | 92   | 2  | 1.14  | + | 1.76 | 1.00E+00 |
| endocytosis                                    | 373  | 8  | 4.61  | + | 1.74 | 1.00E+00 |
| synaptic transmission                          | 331  | 7  | 4.09  | + | 1.71 | 1.00E+00 |
| negative regulation of apoptotic process       | 95   | 2  | 1.17  | + | 1.71 | 1.00E+00 |
| female gamete generation                       | 96   | 2  | 1.19  | + | 1.69 | 1.00E+00 |
| neurotransmitter secretion                     | 145  | 3  | 1.79  | + | 1.68 | 1.00E+00 |
| cell-cell signaling                            | 633  | 13 | 7.82  | + | 1.66 | 1.00E+00 |
| regulation of catalytic activity               | 1073 | 22 | 13.25 | + | 1.66 | 1.00E+00 |

|                                                 |      |    |       |   |      |          |
|-------------------------------------------------|------|----|-------|---|------|----------|
| vitamin metabolic process                       | 49   | 1  | 0.61  | + | 1.65 | 1.00E+00 |
| segment specification                           | 148  | 3  | 1.83  | + | 1.64 | 1.00E+00 |
| lipid metabolic process                         | 880  | 17 | 10.87 | + | 1.56 | 1.00E+00 |
| intracellular protein transport                 | 1052 | 20 | 12.99 | + | 1.54 | 1.00E+00 |
| single-multicellular organism process           | 1636 | 31 | 20.2  | + | 1.53 | 1.00E+00 |
| multicellular organismal process                | 1640 | 31 | 20.25 | + | 1.53 | 1.00E+00 |
| pyrimidine nucleobase metabolic process         | 54   | 1  | 0.67  | + | 1.5  | 1.00E+00 |
| system process                                  | 1296 | 24 | 16    | + | 1.5  | 1.00E+00 |
| protein transport                               | 1082 | 20 | 13.36 | + | 1.5  | 1.00E+00 |
| DNA metabolic process                           | 379  | 7  | 4.68  | + | 1.5  | 1.00E+00 |
| proteolysis                                     | 719  | 13 | 8.88  | + | 1.46 | 1.00E+00 |
| protein targeting                               | 112  | 2  | 1.38  | + | 1.45 | 1.00E+00 |
| hemopoiesis                                     | 112  | 2  | 1.38  | + | 1.45 | 1.00E+00 |
| response to toxic substance                     | 56   | 1  | 0.69  | + | 1.45 | 1.00E+00 |
| oxidative phosphorylation                       | 56   | 1  | 0.69  | + | 1.45 | 1.00E+00 |
| neurological system process                     | 1064 | 19 | 13.14 | + | 1.45 | 1.00E+00 |
| DNA repair                                      | 172  | 3  | 2.12  | + | 1.41 | 1.00E+00 |
| spermatogenesis                                 | 172  | 3  | 2.12  | + | 1.41 | 1.00E+00 |
| localization                                    | 2607 | 45 | 32.19 | + | 1.4  | 1.00E+00 |
| skeletal system development                     | 232  | 4  | 2.86  | + | 1.4  | 1.00E+00 |
| gamete generation                               | 351  | 6  | 4.33  | + | 1.38 | 1.00E+00 |
| reproduction                                    | 410  | 7  | 5.06  | + | 1.38 | 1.00E+00 |
| regulation of phosphate metabolic process       | 178  | 3  | 2.2   | + | 1.36 | 1.00E+00 |
| transport                                       | 2473 | 41 | 30.54 | + | 1.34 | 1.00E+00 |
| phospholipid metabolic process                  | 182  | 3  | 2.25  | + | 1.33 | 1.00E+00 |
| fertilization                                   | 61   | 1  | 0.75  | + | 1.33 | 1.00E+00 |
| death                                           | 566  | 9  | 6.99  | + | 1.29 | 1.00E+00 |
| vesicle-mediated transport                      | 895  | 14 | 11.05 | + | 1.27 | 1.00E+00 |
| polysaccharide metabolic process                | 192  | 3  | 2.37  | + | 1.27 | 1.00E+00 |
| exocytosis                                      | 258  | 4  | 3.19  | + | 1.26 | 1.00E+00 |
| RNA splicing, via transesterification reactions | 132  | 2  | 1.63  | + | 1.23 | 1.00E+00 |
| cellular component organization                 | 1206 | 18 | 14.89 | + | 1.21 | 1.00E+00 |
| RNA splicing                                    | 135  | 2  | 1.67  | + | 1.2  | 1.00E+00 |
| biological regulation                           | 3918 | 58 | 48.38 | + | 1.2  | 1.00E+00 |
| sensory perception of sound                     | 68   | 1  | 0.84  | + | 1.19 | 1.00E+00 |
| apoptotic process                               | 548  | 8  | 6.77  | + | 1.18 | 1.00E+00 |
| cellular component organization or biogenesis   | 1316 | 19 | 16.25 | + | 1.17 | 1.00E+00 |
| cell death                                      | 562  | 8  | 6.94  | + | 1.15 | 1.00E+00 |
| regulation of biological process                | 2846 | 39 | 35.14 | + | 1.11 | 1.00E+00 |
| cellular defense response                       | 231  | 3  | 2.85  | + | 1.05 | 1.00E+00 |

|                                                                |      |     |        |   |      |          |
|----------------------------------------------------------------|------|-----|--------|---|------|----------|
| protein folding                                                | 155  | 2   | 1.91   | + | 1.05 | 1.00E+00 |
| metabolic process                                              | 8247 | 103 | 101.83 | + | 1.01 | 1.00E+00 |
| cell differentiation                                           | 161  | 2   | 1.99   | + | 1.01 | 1.00E+00 |
| cellular amino acid biosynthetic process                       | 81   | 1   | 1      | - | 1    | 1.00E+00 |
| protein metabolic process                                      | 2692 | 33  | 33.24  | - | 0.99 | 1.00E+00 |
| tRNA metabolic process                                         | 82   | 1   | 1.01   | - | 0.99 | 1.00E+00 |
| nitrogen compound metabolic process                            | 1099 | 13  | 13.57  | - | 0.96 | 1.00E+00 |
| cell cycle                                                     | 1107 | 13  | 13.67  | - | 0.95 | 1.00E+00 |
| primary metabolic process                                      | 6825 | 80  | 84.27  | - | 0.95 | 1.00E+00 |
| cellular amino acid metabolic process                          | 264  | 3   | 3.26   | - | 0.92 | 1.00E+00 |
| mRNA splicing, via spliceosome                                 | 183  | 2   | 2.26   | - | 0.89 | 1.00E+00 |
| regulation of transcription from RNA polymerase II promoter    | 1319 | 14  | 16.29  | - | 0.86 | 1.00E+00 |
| regulation of nucleobase-containing compound metabolic process | 1700 | 18  | 20.99  | - | 0.86 | 1.00E+00 |
| biosynthetic process                                           | 764  | 8   | 9.43   | - | 0.85 | 1.00E+00 |
| muscle organ development                                       | 288  | 3   | 3.56   | - | 0.84 | 1.00E+00 |
| natural killer cell activation                                 | 99   | 1   | 1.22   | - | 0.82 | 1.00E+00 |
| cellular protein modification process                          | 1317 | 13  | 16.26  | - | 0.8  | 1.00E+00 |
| transcription, DNA-dependent                                   | 1941 | 19  | 23.97  | - | 0.79 | 1.00E+00 |
| nucleobase-containing compound metabolic process               | 3467 | 33  | 42.81  | - | 0.77 | 1.00E+00 |
| protein complex assembly                                       | 107  | 1   | 1.32   | - | 0.76 | 1.00E+00 |
| transcription from RNA polymerase II promoter                  | 1723 | 16  | 21.27  | - | 0.75 | 1.00E+00 |
| protein complex biogenesis                                     | 108  | 1   | 1.33   | - | 0.75 | 1.00E+00 |
| phosphate-containing compound metabolic process                | 910  | 8   | 11.24  | - | 0.71 | 1.00E+00 |
| cytokinesis                                                    | 114  | 1   | 1.41   | - | 0.71 | 1.00E+00 |
| carbohydrate metabolic process                                 | 573  | 5   | 7.08   | - | 0.71 | 1.00E+00 |
| protein localization                                           | 116  | 1   | 1.43   | - | 0.7  | 1.00E+00 |
| nucleobase-containing compound transport                       | 116  | 1   | 1.43   | - | 0.7  | 1.00E+00 |
| RNA metabolic process                                          | 2360 | 20  | 29.14  | - | 0.69 | 1.00E+00 |
| ion transport                                                  | 714  | 6   | 8.82   | - | 0.68 | 1.00E+00 |
| protein phosphorylation                                        | 603  | 5   | 7.45   | - | 0.67 | 1.00E+00 |
| catabolic process                                              | 407  | 3   | 5.03   | - | 0.6  | 1.00E+00 |
| mRNA processing                                                | 274  | 2   | 3.38   | - | 0.59 | 1.00E+00 |
| cation transport                                               | 571  | 4   | 7.05   | - | 0.57 | 1.00E+00 |
| muscle contraction                                             | 217  | 1   | 2.68   | - | 0.37 | 1.00E+00 |
| translation                                                    | 435  | 2   | 5.37   | - | 0.37 | 1.00E+00 |
| visual perception                                              | 219  | 1   | 2.7    | - | 0.37 | 1.00E+00 |
| sensory perception                                             | 455  | 2   | 5.62   | - | 0.36 | 1.00E+00 |
| chromatin organization                                         | 250  | 1   | 3.09   | - | 0.32 | 1.00E+00 |
| organelle organization                                         | 571  | 2   | 7.05   | - | 0.28 | 1.00E+00 |
| cellular component biogenesis                                  | 310  | 1   | 3.83   | - | 0.26 | 1.00E+00 |

|                                                 |     |   |      |   |       |          |
|-------------------------------------------------|-----|---|------|---|-------|----------|
| mitosis                                         | 367 | 1 | 4.53 | - | 0.22  | 1.00E+00 |
| cytokine production                             | 4   | 0 | 0.05 | - | < 0.2 | 1.00E+00 |
| regulation of cell cycle                        | 26  | 0 | 0.32 | - | < 0.2 | 1.00E+00 |
| chromosome segregation                          | 91  | 0 | 1.12 | - | < 0.2 | 1.00E+00 |
| phosphate ion transport                         | 97  | 0 | 1.2  | - | < 0.2 | 1.00E+00 |
| multi-multicellular organism process            | 1   | 0 | 0.01 | - | < 0.2 | 1.00E+00 |
| regulation of translation                       | 148 | 0 | 1.83 | - | < 0.2 | 1.00E+00 |
| mRNA transcription                              | 57  | 0 | 0.7  | - | < 0.2 | 1.00E+00 |
| mRNA polyadenylation                            | 20  | 0 | 0.25 | - | < 0.2 | 1.00E+00 |
| lysosomal transport                             | 44  | 0 | 0.54 | - | < 0.2 | 1.00E+00 |
| nitric oxide biosynthetic process               | 6   | 0 | 0.07 | - | < 0.2 | 1.00E+00 |
| 7-methylguanosine mRNA capping                  | 3   | 0 | 0.04 | - | < 0.2 | 1.00E+00 |
| asymmetric protein localization                 | 13  | 0 | 0.16 | - | < 0.2 | 1.00E+00 |
| RNA localization                                | 83  | 0 | 1.02 | - | < 0.2 | 1.00E+00 |
| RNA catabolic process                           | 56  | 0 | 0.69 | - | < 0.2 | 1.00E+00 |
| response to endogenous stimulus                 | 57  | 0 | 0.7  | - | < 0.2 | 1.00E+00 |
| circadian rhythm                                | 2   | 0 | 0.02 | - | < 0.2 | 1.00E+00 |
| pteridine-containing compound metabolic process | 1   | 0 | 0.01 | - | < 0.2 | 1.00E+00 |
| carbohydrate transport                          | 78  | 0 | 0.96 | - | < 0.2 | 1.00E+00 |
| vitamin catabolic process                       | 1   | 0 | 0.01 | - | < 0.2 | 1.00E+00 |
| vitamin biosynthetic process                    | 36  | 0 | 0.44 | - | < 0.2 | 1.00E+00 |
| response to pheromone                           | 6   | 0 | 0.07 | - | < 0.2 | 1.00E+00 |
| sensory perception of pain                      | 13  | 0 | 0.16 | - | < 0.2 | 1.00E+00 |
| peroxisomal transport                           | 18  | 0 | 0.22 | - | < 0.2 | 1.00E+00 |
| defense response to bacterium                   | 25  | 0 | 0.31 | - | < 0.2 | 1.00E+00 |
| cytoskeleton organization                       | 78  | 0 | 0.96 | - | < 0.2 | 1.00E+00 |
| sensory perception of smell                     | 30  | 0 | 0.37 | - | < 0.2 | 1.00E+00 |
| sensory perception of chemical stimulus         | 133 | 0 | 1.64 | - | < 0.2 | 1.00E+00 |
| rRNA metabolic process                          | 115 | 0 | 1.42 | - | < 0.2 | 1.00E+00 |
| cellular amino acid catabolic process           | 53  | 0 | 0.65 | - | < 0.2 | 1.00E+00 |
| regulation of vasoconstriction                  | 52  | 0 | 0.64 | - | < 0.2 | 1.00E+00 |
| cell recognition                                | 1   | 0 | 0.01 | - | < 0.2 | 1.00E+00 |
| coenzyme metabolic process                      | 103 | 0 | 1.27 | - | < 0.2 | 1.00E+00 |
| mammary gland development                       | 15  | 0 | 0.19 | - | < 0.2 | 1.00E+00 |
| mitochondrion organization                      | 40  | 0 | 0.49 | - | < 0.2 | 1.00E+00 |
| chromatin remodeling                            | 7   | 0 | 0.09 | - | < 0.2 | 1.00E+00 |
| protein lipidation                              | 31  | 0 | 0.38 | - | < 0.2 | 1.00E+00 |
| tricarboxylic acid cycle                        | 20  | 0 | 0.25 | - | < 0.2 | 1.00E+00 |
| pentose-phosphate shunt                         | 9   | 0 | 0.11 | - | < 0.2 | 1.00E+00 |
| glycolysis                                      | 25  | 0 | 0.31 | - | < 0.2 | 1.00E+00 |

|                                                                |     |   |      |   |       |          |
|----------------------------------------------------------------|-----|---|------|---|-------|----------|
| gluconeogenesis                                                | 14  | 0 | 0.17 | - | < 0.2 | 1.00E+00 |
| cellular glucose homeostasis                                   | 60  | 0 | 0.74 | - | < 0.2 | 1.00E+00 |
| chromatin assembly                                             | 24  | 0 | 0.3  | - | < 0.2 | 1.00E+00 |
| regulation of cellular amino acid metabolic process            | 11  | 0 | 0.14 | - | < 0.2 | 1.00E+00 |
| prosthetic group metabolic process                             | 5   | 0 | 0.06 | - | < 0.2 | 1.00E+00 |
| cell growth                                                    | 3   | 0 | 0.04 | - | < 0.2 | 1.00E+00 |
| protein methylation                                            | 14  | 0 | 0.17 | - | < 0.2 | 1.00E+00 |
| regulation of gene expression, epigenetic                      | 8   | 0 | 0.1  | - | < 0.2 | 1.00E+00 |
| mRNA 3'-end processing                                         | 30  | 0 | 0.37 | - | < 0.2 | 1.00E+00 |
| protein acetylation                                            | 35  | 0 | 0.43 | - | < 0.2 | 1.00E+00 |
| DNA recombination                                              | 50  | 0 | 0.62 | - | < 0.2 | 1.00E+00 |
| phagocytosis                                                   | 24  | 0 | 0.3  | - | < 0.2 | 1.00E+00 |
| protein ADP-ribosylation                                       | 8   | 0 | 0.1  | - | < 0.2 | 1.00E+00 |
| pinocytosis                                                    | 1   | 0 | 0.01 | - | < 0.2 | 1.00E+00 |
| bile acid metabolic process                                    | 1   | 0 | 0.01 | - | < 0.2 | 1.00E+00 |
| response to abiotic stimulus                                   | 23  | 0 | 0.28 | - | < 0.2 | 1.00E+00 |
| amino acid transport                                           | 59  | 0 | 0.73 | - | < 0.2 | 1.00E+00 |
| sex determination                                              | 7   | 0 | 0.09 | - | < 0.2 | 1.00E+00 |
| endoderm development                                           | 12  | 0 | 0.15 | - | < 0.2 | 1.00E+00 |
| DNA catabolic process                                          | 4   | 0 | 0.05 | - | < 0.2 | 1.00E+00 |
| monosaccharide metabolic process                               | 143 | 0 | 1.77 | - | < 0.2 | 1.00E+00 |
| secondary metabolic process                                    | 2   | 0 | 0.02 | - | < 0.2 | 1.00E+00 |
| regulation of carbohydrate metabolic process                   | 21  | 0 | 0.26 | - | < 0.2 | 1.00E+00 |
| cyclic nucleotide metabolic process                            | 80  | 0 | 0.99 | - | < 0.2 | 1.00E+00 |
| nitrogen utilization                                           | 2   | 0 | 0.02 | - | < 0.2 | 1.00E+00 |
| ovulation cycle process                                        | 1   | 0 | 0.01 | - | < 0.2 | 1.00E+00 |
| meiosis                                                        | 29  | 0 | 0.36 | - | < 0.2 | 1.00E+00 |
| disaccharide metabolic process                                 | 1   | 0 | 0.01 | - | < 0.2 | 1.00E+00 |
| growth                                                         | 5   | 0 | 0.06 | - | < 0.2 | 1.00E+00 |
| antigen processing and presentation of peptide or polysacchari | 38  | 0 | 0.47 | - | < 0.2 | 1.00E+00 |
| neuromuscular synaptic transmission                            | 6   | 0 | 0.07 | - | < 0.2 | 1.00E+00 |
| antigen processing and presentation                            | 56  | 0 | 0.69 | - | < 0.2 | 1.00E+00 |
| mitochondrial transport                                        | 25  | 0 | 0.31 | - | < 0.2 | 1.00E+00 |
| digestive tract mesoderm development                           | 48  | 0 | 0.59 | - | < 0.2 | 1.00E+00 |
| circadian behavior                                             | 2   | 0 | 0.02 | - | < 0.2 | 1.00E+00 |
| rhythmic process                                               | 4   | 0 | 0.05 | - | < 0.2 | 1.00E+00 |
| sensory perception of taste                                    | 12  | 0 | 0.15 | - | < 0.2 | 1.00E+00 |
| acyl-CoA metabolic process                                     | 33  | 0 | 0.41 | - | < 0.2 | 1.00E+00 |
| unsaturated fatty acid biosynthetic process                    | 10  | 0 | 0.12 | - | < 0.2 | 1.00E+00 |
| polyphosphate catabolic process                                | 3   | 0 | 0.04 | - | < 0.2 | 1.00E+00 |

|                                       |    |   |      |   |       |          |
|---------------------------------------|----|---|------|---|-------|----------|
| fatty acid beta-oxidation             | 33 | 0 | 0.41 | - | < 0.2 | 1.00E+00 |
| fatty acid biosynthetic process       | 42 | 0 | 0.52 | - | < 0.2 | 1.00E+00 |
| anterior/posterior axis specification | 28 | 0 | 0.35 | - | < 0.2 | 1.00E+00 |

**Supplemental Table 8:** Gene sets with FDR or FWER  $\leq 0.05$  from GSEA of TCGA Cohort I High Risk vs Low Risk

| NAME                                               | SIZE | ES   | NES  | NOM p-val   | FDR q-val   | FWER p-val | RANK AT MAX |
|----------------------------------------------------|------|------|------|-------------|-------------|------------|-------------|
| RICKMAN_TUMOR_DIFFERENTIATED_WELL_VS_MODERATELY_DN | 90   | 0.72 | 2.44 | 0           | 0.00191886  | 0.001      | 2518        |
| RICKMAN_TUMOR_DIFFERENTIATED_WELL_VS_POORLY_DN     | 348  | 0.65 | 2.43 | 0           | 9.59E-04    | 0.001      | 3866        |
| CHARAFE_BREAST_CANCER_LUMINAL_VS_BASAL_DN          | 429  | 0.62 | 2.31 | 0           | 0.006445217 | 0.008      | 4150        |
| GRUETZMANN_PANCREATIC_CANCER_UP                    | 350  | 0.55 | 2.30 | 0           | 0.005233529 | 0.009      | 3971        |
| CROMER_METASTASIS_DN                               | 80   | 0.67 | 2.29 | 0           | 0.005789975 | 0.013      | 2742        |
| AMIT_EGF_RESPONSE_480_HELA                         | 159  | 0.65 | 2.28 | 0.002178649 | 0.005545371 | 0.015      | 3135        |
| HUANG_DASATINIB_RESISTANCE_UP                      | 80   | 0.73 | 2.22 | 0           | 0.011273473 | 0.033      | 4023        |
| RICKMAN_HEAD_AND_NECK_CANCER_C                     | 71   | 0.60 | 2.21 | 0           | 0.011262935 | 0.036      | 4251        |
| SENESE_HDAC2_TARGETS_UP                            | 107  | 0.63 | 2.20 | 0           | 0.012978726 | 0.046      | 3777        |
| CHARAFE_BREAST_CANCER_LUMINAL_VS_MESENCHYMAL_DN    | 446  | 0.63 | 2.19 | 0.002096436 | 0.013437703 | 0.054      | 4246        |
| KOINUMA_TARGETS_OF_SMAD2_OR_SMAD3                  | 796  | 0.50 | 2.18 | 0           | 0.013472037 | 0.059      | 3822        |
| LEI_MYB_TARGETS                                    | 311  | 0.50 | 2.18 | 0           | 0.012489755 | 0.06       | 3794        |
| PID_A6B1_A6B4_INTEGRIN_PATHWAY                     | 46   | 0.64 | 2.18 | 0           | 0.011622255 | 0.061      | 2334        |
| AMIT_EGF_RESPONSE_240_HELA                         | 60   | 0.64 | 2.16 | 0.002118644 | 0.013259431 | 0.073      | 2942        |
| RODRIGUES_THYROID_CARCINOMA_ANAPLASTIC_UP          | 684  | 0.62 | 2.16 | 0           | 0.013007506 | 0.075      | 3639        |
| VANTVEER_BREAST_CANCER_ESR1_DN                     | 225  | 0.58 | 2.16 | 0           | 0.01305657  | 0.08       | 4405        |
| BROWNE_HCMV_INFECTION_2HR_DN                       | 47   | 0.67 | 2.14 | 0           | 0.015072336 | 0.096      | 3701        |
| SENESE_HDAC1_AND_HDAC2_TARGETS_UP                  | 216  | 0.55 | 2.14 | 0           | 0.01675659  | 0.114      | 3827        |
| SESTO_RESPONSE_TO_UV_C1                            | 71   | 0.60 | 2.13 | 0           | 0.016908998 | 0.118      | 4592        |
| WU_CELL_MIGRATION                                  | 181  | 0.55 | 2.13 | 0           | 0.016699651 | 0.124      | 3550        |
| MURAKAMI_UV_RESPONSE_6HR_UP                        | 33   | 0.62 | 2.12 | 0           | 0.019299705 | 0.14       | 3748        |
| BRUECKNER_TARGETS_OF_MIRLET7A3_DN                  | 73   | 0.63 | 2.11 | 0           | 0.020314626 | 0.148      | 3249        |
| SENESE_HDAC1_TARGETS_UP                            | 421  | 0.53 | 2.11 | 0           | 0.019877627 | 0.151      | 3777        |
| PID_EPHB_FWD_PATHWAY                               | 39   | 0.66 | 2.11 | 0           | 0.020174354 | 0.16       | 2433        |
| HUMMERICH_SKIN_CANCER_PROGRESSION_UP               | 86   | 0.58 | 2.09 | 0           | 0.028862694 | 0.219      | 3607        |
| DITTMER_PTHLH_TARGETS_DN                           | 70   | 0.56 | 2.08 | 0           | 0.02822611  | 0.22       | 3041        |
| TOOKER_GEMCITABINE_RESISTANCE_DN                   | 122  | 0.53 | 2.07 | 0.002164502 | 0.03671076  | 0.276      | 3597        |
| GHO_ATF5_TARGETS_DN                                | 16   | 0.74 | 2.07 | 0.002070393 | 0.036220852 | 0.279      | 1994        |
| CSR_EARLY_UP.V1_UP                                 | 154  | 0.55 | 2.06 | 0           | 0.03691489  | 0.289      | 3969        |
| KIM_WT1_TARGETS_UP                                 | 207  | 0.56 | 2.06 | 0.002155172 | 0.036090765 | 0.292      | 3738        |
| WINTER_HYPOXIA_UP                                  | 89   | 0.67 | 2.06 | 0.002155172 | 0.035097178 | 0.293      | 2546        |
| NAKAMURA_TUMOR_ZONE_PERIPHERAL_VS_CENTRAL_UP       | 272  | 0.57 | 2.06 | 0           | 0.03422338  | 0.294      | 5198        |
| BMI1_DN.V1_UP                                      | 138  | 0.57 | 2.06 | 0.002188184 | 0.03547121  | 0.306      | 3799        |
| KIM_WT1_TARGETS_12HR_DN                            | 199  | 0.48 | 2.05 | 0           | 0.035240397 | 0.31       | 3922        |
| RICKMAN_METASTASIS_DN                              | 245  | 0.56 | 2.05 | 0.00210084  | 0.035487063 | 0.317      | 4502        |
| KRIEG_HYPOXIA_NOT_VIA_KDM3A                        | 703  | 0.46 | 2.04 | 0           | 0.039526902 | 0.352      | 4277        |
| BASAKI_YBX1_TARGETS_UP                             | 279  | 0.64 | 2.04 | 0           | 0.038609874 | 0.354      | 3829        |
| DAUER_STAT3_TARGETS_UP                             | 46   | 0.65 | 2.04 | 0           | 0.041230842 | 0.371      | 2577        |
| MCCABE_HOXC6_TARGETS_CANCER_DN                     | 20   | 0.67 | 2.04 | 0           | 0.040580448 | 0.374      | 1163        |
| WANG_METHYLATED_IN_BREAST_CANCER                   | 34   | 0.69 | 2.04 | 0.002109705 | 0.039565936 | 0.374      | 2782        |



|                                               |     |      |      |             |             |       |      |
|-----------------------------------------------|-----|------|------|-------------|-------------|-------|------|
| WINTER_HYPOXIA_METAGENE                       | 221 | 0.49 | 2.04 | 0           | 0.039360963 | 0.378 | 3762 |
| JACKSON_DNMT1_TARGETS_UP                      | 73  | 0.53 | 2.03 | 0           | 0.04388277  | 0.404 | 4968 |
| KAPOSI_LIVER_CANCER_MET_UP                    | 17  | 0.77 | 2.02 | 0.002074689 | 0.04487527  | 0.415 | 3123 |
| PEDERSEN_TARGETS_OF_611CTF_ISOFORM_OF_ERBB2   | 72  | 0.61 | 2.02 | 0.002262444 | 0.044234816 | 0.418 | 3587 |
| KIM_WT1_TARGETS_8HR_UP                        | 154 | 0.54 | 2.02 | 0.002057613 | 0.04348874  | 0.419 | 4698 |
| STEIN_ESRRA_TARGETS_RESPONSIVE_TO_ESTROGEN_UP | 30  | 0.62 | 2.02 | 0           | 0.045527227 | 0.434 | 4453 |
| GU_PDEF_TARGETS_DN                            | 33  | 0.63 | 2.01 | 0.002298851 | 0.046622626 | 0.442 | 4219 |
| GOLDRATH_ANTIGEN_RESPONSE                     | 333 | 0.54 | 2.01 | 0           | 0.048964106 | 0.461 | 3188 |
| SIMBULAN_UV_RESPONSE_IMMORTALIZED_DN          | 31  | 0.69 | 2.01 | 0           | 0.04796484  | 0.461 | 4063 |
| KARLSSON_TGFB1_TARGETS_UP                     | 122 | 0.58 | 2.01 | 0           | 0.047683936 | 0.462 | 3745 |
| BILD_HRAS_ONCOGENIC_SIGNATURE                 | 249 | 0.50 | 2.01 | 0           | 0.047246817 | 0.465 | 3748 |
| PHONG_TNF_RESPONSE_NOT_VIA_P38                | 333 | 0.48 | 2.01 | 0           | 0.046768207 | 0.467 | 3556 |
| ALONSO_METASTASIS_EMT_UP                      | 34  | 0.63 | 2.00 | 0.002096436 | 0.047593277 | 0.475 | 4112 |
| KEGG_RENAL_CELL_CARCINOMA                     | 68  | 0.55 | 2.00 | 0           | 0.047741115 | 0.482 | 4126 |
| MEL18_DN.V1_UP                                | 137 | 0.56 | 2.00 | 0.002178649 | 0.049314614 | 0.498 | 4019 |
| DOANE_BREAST_CANCER_CLASSES_DN                | 33  | 0.65 | 2.00 | 0.002118644 | 0.049704615 | 0.505 | 1219 |
| AMIT_SERUM_RESPONSE_240_MCF10A                | 55  | 0.59 | 2.00 | 0.004175365 | 0.04928575  | 0.505 | 3739 |
| RUIZ_TNC_TARGETS_DN                           | 139 | 0.67 | 2.00 | 0           | 0.048435997 | 0.505 | 3306 |
| FOURNIER_ACINAR_DEVELOPMENT_LATE_2            | 274 | 0.61 | 2.00 | 0.00422833  | 0.04761505  | 0.505 | 3515 |
| BERENJENO_TRANSFORMED_BY_RHOA_UP              | 521 | 0.57 | 2.00 | 0           | 0.048048902 | 0.515 | 4703 |
| PEDERSEN_METASTASIS_BY_ERBB2_ISOFORM_7        | 375 | 0.43 | 1.99 | 0           | 0.048433755 | 0.525 | 3729 |
| WHITFIELD_CELL_CYCLE_G2_M                     | 208 | 0.55 | 1.99 | 0           | 0.048496753 | 0.529 | 3684 |
| VEGF_A_UP.V1_DN                               | 186 | 0.55 | 1.99 | 0           | 0.047904763 | 0.53  | 4857 |
| KEGG_FOCAL_ADHESION                           | 181 | 0.56 | 1.99 | 0           | 0.047487613 | 0.533 | 4041 |
| AZARE_NEOPLASTIC_TRANSFORMATION_BY_STAT3_UP   | 111 | 0.55 | 1.99 | 0.002262444 | 0.047638763 | 0.536 | 5407 |
| ZEMBUTSU_SENSITIVITY_TO_FLUOROURACIL          | 13  | 0.71 | 1.99 | 0.002136752 | 0.048174407 | 0.545 | 3082 |
| REN_ALVEOLAR_RHABDOMYOSARCOMA_DN              | 404 | 0.56 | 1.99 | 0.002066116 | 0.04831323  | 0.551 | 4554 |
| KEGG_ADHERENS_JUNCTION                        | 69  | 0.58 | 1.99 | 0           | 0.04846249  | 0.555 | 4352 |
| NUYTEN_NIPP1_TARGETS_DN                       | 812 | 0.44 | 1.99 | 0           | 0.04785798  | 0.555 | 4252 |
| SESTO_RESPONSE_TO_UV_C5                       | 46  | 0.65 | 1.98 | 0           | 0.047489785 | 0.556 | 5623 |
| HERNANDEZ_MITOTIC_ARREST_BY_DOCETAXEL_2_UP    | 59  | 0.53 | 1.98 | 0.002415459 | 0.047107797 | 0.558 | 3964 |
| PID_PI3KCI_AKT_PATHWAY                        | 35  | 0.62 | 1.98 | 0           | 0.047431227 | 0.563 | 5071 |
| SHEDDEN_LUNG_CANCER_POOR_SURVIVAL_A6          | 428 | 0.70 | 1.98 | 0.002114165 | 0.04875226  | 0.573 | 3219 |
| FIGUEROA_AML_METHYLATION_CLUSTER_3_DN         | 34  | 0.58 | 1.98 | 0.002105263 | 0.049279183 | 0.578 | 4547 |
| FURUKAWA_DUSP6_TARGETS_PCI35_DN               | 70  | 0.67 | 1.98 | 0.002173913 | 0.049279273 | 0.582 | 2438 |
| CROMER_TUMORIGENESIS_UP                       | 60  | 0.66 | 1.96 | 0.002197802 | 0.049876116 | 0.628 | 5113 |
| SESTO_RESPONSE_TO_UV_C8                       | 69  | 0.53 | 1.96 | 0.002061856 | 0.04937641  | 0.629 | 3122 |
| ELVIDGE_HYPOXIA_BY_DMOG_UP                    | 127 | 0.52 | 1.96 | 0.002164502 | 0.048827782 | 0.629 | 4616 |
| REACTOME_SHC1_EVENTS_IN_ERBB4_SIGNALING       | 18  | 0.68 | 1.96 | 0           | 0.048752576 | 0.631 | 3985 |
| OXFORD_RALA_OR_RALB_TARGETS_DN                | 23  | 0.67 | 1.96 | 0           | 0.049958814 | 0.637 | 3044 |
| AMIT_EGF_RESPONSE_480_MCF10A                  | 40  | 0.59 | 1.96 | 0           | 0.04958467  | 0.638 | 3395 |
| KRIEG_HYPOXIA_VIA_KDM3A                       | 51  | 0.59 | 1.96 | 0.004376368 | 0.04934461  | 0.638 | 4402 |
| ONDER_CDH1_TARGETS_1_DN                       | 159 | 0.53 | 1.96 | 0           | 0.048842892 | 0.638 | 5054 |
| HIRSCH_CELLULAR_TRANSFORMATION_SIGNATURE_UP   | 236 | 0.48 | 1.96 | 0           | 0.04950745  | 0.644 | 3642 |

|                                                   |     |      |      |             |             |       |      |
|---------------------------------------------------|-----|------|------|-------------|-------------|-------|------|
| YAMASHITA_LIVER_CANCER_STEM_CELL_UP               | 44  | 0.57 | 1.96 | 0.002283105 | 0.049909994 | 0.647 | 3364 |
| REACTOME_SIGNAL_TRANSDUCTION_BY_L1                | 33  | 0.60 | 1.95 | 0.002155172 | 0.049856707 | 0.653 | 2167 |
| SARTIPY_NORMAL_AT_INSULIN_RESISTANCE_UP           | 34  | 0.63 | 1.95 | 0.002096436 | 0.049514458 | 0.654 | 4647 |
| SARRIO_EPITHELIAL_MESENCHYMAL_TRANSITION_UP       | 170 | 0.65 | 1.95 | 0.006593407 | 0.049611337 | 0.655 | 3986 |
| OSADA_ASCL1_TARGETS_DN                            | 24  | 0.68 | 1.95 | 0.00456621  | 0.04983411  | 0.656 | 2250 |
| BIOCARTA_IL4_PATHWAY                              | 10  | 0.83 | 1.95 | 0.00407332  | 0.04940771  | 0.656 | 3082 |
| APRELIKOVA_BRCA1_TARGETS                          | 45  | 0.57 | 1.95 | 0           | 0.0490294   | 0.657 | 4526 |
| REACTOME_CELL_CELL_COMMUNICATION                  | 102 | 0.51 | 1.95 | 0.002217295 | 0.049413517 | 0.663 | 4157 |
| REACTOME_SHC1_EVENTS_IN_EGFR_SIGNALING            | 15  | 0.72 | 1.95 | 0.002040816 | 0.04956859  | 0.668 | 2433 |
| ONDER_CDH1_TARGETS_2_DN                           | 437 | 0.47 | 1.95 | 0.002398082 | 0.049578033 | 0.673 | 4673 |
| REACTOME_SHC_RELATED_EVENTS                       | 16  | 0.70 | 1.94 | 0           | 0.049740963 | 0.674 | 2433 |
| KEGG_REGULATION_OF_ACTIN_CYTOSKELETON             | 177 | 0.50 | 1.94 | 0.002123142 | 0.049667988 | 0.676 | 4352 |
| WANG_BARRETTS_ESOPHAGUS_AND_ESOPHAGUS_CANCER_DN   | 31  | 0.62 | 1.94 | 0           | 0.04944742  | 0.677 | 2518 |
| CHIANG_LIVER_CANCER_SUBCLASS_PROLIFERATION_UP     | 167 | 0.63 | 1.94 | 0.010460251 | 0.049087156 | 0.678 | 3070 |
| SMID_BREAST_CANCER_RELAPSE_IN_LUNG_UP             | 17  | 0.72 | 1.94 | 0.004464286 | 0.04879417  | 0.678 | 1420 |
| KEGG_DORSO_VENTRAL_AXIS_FORMATION                 | 20  | 0.66 | 1.94 | 0           | 0.04900794  | 0.682 | 5331 |
| RB_P130_DN.V1_DN                                  | 129 | 0.49 | 1.94 | 0.002123142 | 0.048910674 | 0.685 | 3247 |
| SHEPARD_BMYB_TARGETS                              | 58  | 0.63 | 1.94 | 0.002150538 | 0.04947987  | 0.69  | 2429 |
| VERRECCHIA_RESPONSE_TO_TGFB1_C2                   | 24  | 0.73 | 1.94 | 0.005964215 | 0.049108822 | 0.69  | 3474 |
| KUROKAWA_LIVER_CANCER_CHEMOTHERAPY_DN             | 38  | 0.54 | 1.94 | 0           | 0.048802402 | 0.69  | 6192 |
| GROSS_HYPOXIA_VIA_ELK3_ONLY_UP                    | 33  | 0.59 | 1.94 | 0.004415011 | 0.048546128 | 0.692 | 4289 |
| KIM_MYCL1_AMPLIFICATION_TARGETS_DN                | 19  | 0.68 | 1.94 | 0           | 0.048167676 | 0.692 | 2509 |
| NAKAMURA_CANCER_MICROENVIRONMENT_DN               | 45  | 0.70 | 1.94 | 0           | 0.048005152 | 0.693 | 2350 |
| XU_RESPONSE_TO_TRETINOIN_DN                       | 13  | 0.71 | 1.94 | 0           | 0.048142172 | 0.698 | 1873 |
| ACEVEDO_FGFR1_TARGETS_IN_PROSTATE_CANCER_MODEL_UP | 253 | 0.45 | 1.94 | 0           | 0.04811718  | 0.7   | 4183 |
| NAKAYAMA_SOFT_TISSUE_TUMORS_PCA2_UP               | 79  | 0.69 | 1.94 | 0.002212389 | 0.047984343 | 0.702 | 2853 |
| LE_SKI_TARGETS_UP                                 | 15  | 0.71 | 1.93 | 0.008583691 | 0.049323667 | 0.715 | 862  |
| SHEPARD_CRUSH_AND_BURN_MUTANT_DN                  | 148 | 0.54 | 1.93 | 0.002155172 | 0.04918046  | 0.716 | 2857 |
| ZHAN_MULTIPLE_MYELOMA_CD2_DN                      | 46  | 0.54 | 1.93 | 0.002309469 | 0.048978806 | 0.716 | 2206 |
| LIEN_BREAST_CARCINOMA_METAPLASTIC_VS_DUCTAL_UP    | 70  | 0.58 | 1.93 | 0.002304148 | 0.04870754  | 0.716 | 4895 |

**Supplemental Table 9:** Cox proportional hazards models in TCGA Cohort I

|            | <b>univariate</b>        |                                  | <b>multivariate</b>      |                                  |
|------------|--------------------------|----------------------------------|--------------------------|----------------------------------|
|            | Hazard Ratio<br>(95% CI) | Likelihood ratio<br>test p-value | Hazard Ratio<br>(95% CI) | Likelihood ratio<br>test p-value |
| Stage      | 1.58 (1.29-1.93)         | $7.45 \times 10^{-6}$            | 1.58 (1.26-1.99)         | $8.42 \times 10^{-5}$            |
| Gender     | 1.01 (0.64-1.59)         | 0.944                            | 1.25 (0.78-1.99)         | 0.354                            |
| Age        | 1.02 (1.00-1.05)         | 0.0781                           | 1.04 (1.01-1.06)         | 0.00267                          |
| Risk Score | 3.03 (2.14-3.43)         | $6.37 \times 10^{-17}$           | 2.58 (2.02-3.29)         | $2.96 \times 10^{-14}$           |

**Supplemental Table 10:** Evaluation and comparison of prognostic performance of 5 published lung adenocarcinoma prognostic signatures

The gene lists from the published signatures was used re-derive coefficients in TCGA Cohort I using a multivariate Cox model, the same way that the 4-gene prognostic signature of the present study was derived. The resulting models were then tested for prognostic significance in all 3 cohorts using a univariate Cox model, as well as a multivariate Cox model with the present study 4-gene signature as the only other variable.

|                                        |                     | <i>Kratz et al.</i>      |                             | <i>Bianchi et al.</i>    |                             | <i>Boutros et al.</i>    |                             | <i>Chen et al.</i>       |                             | <i>Lau et al.</i>        |                             |
|----------------------------------------|---------------------|--------------------------|-----------------------------|--------------------------|-----------------------------|--------------------------|-----------------------------|--------------------------|-----------------------------|--------------------------|-----------------------------|
|                                        |                     | Hazard Ratio<br>(95% CI) | Likelihood ratio<br>p-value |
| <b>TCGA Cohort I<br/>(training)</b>    | <b>Univariate</b>   | 2.74 (1.84-4.08)         | <0.0001                     | 1.47 (1.03-2.10)         | 0.035                       | 2.52 (1.74-3.64)         | <0.0001                     | 2.70 (1.61-4.53)         | 0.00017                     | 2.71 (0.82-9.02)         | 0.10                        |
|                                        | <b>Multivariate</b> |                          |                             |                          |                             |                          |                             |                          |                             |                          |                             |
|                                        | other signature     | 1.42 (0.91-2.20)         | 0.12                        | 0.85 (0.53-1.35)         | 0.49                        | 1.31 (0.89-1.93)         | 0.17                        | 1.51 (0.92-2.48)         | 0.10                        | 1.93 (0.56-6.63)         | 0.30                        |
|                                        | 4-gene signature    | 2.44 (1.86-3.20)         | <0.0001                     | 2.88 (2.22-3.75)         | <0.0001                     | 2.48 (1.90-3.25)         | <0.0001                     | 2.55 (1.99-3.27)         | <0.0001                     | 2.67 (2.11-3.37)         | <0.0001                     |
| <b>TCGA Cohort II<br/>(validation)</b> | <b>Univariate</b>   | 1.81 (0.86-3.85)         | 0.12                        | 0.71 (0.31-1.62)         | 0.42                        | 0.98 (0.93-1.03)         | 0.45                        | 2.35 (1.22-5.51)         | 0.024                       | 1.00 (0.99-1.00)         | 0.43                        |
|                                        | <b>Multivariate</b> |                          |                             |                          |                             |                          |                             |                          |                             |                          |                             |
|                                        | other signature     | 1.28 (0.54-2.99)         | 0.57                        | 0.51 (0.20-1.30)         | 0.16                        | 1.03 (0.96-1.10)         | 0.45                        | 1.23 (1.14-4.26)         | 0.020                       | 1.00 (0.99-1.01)         | 0.68                        |
|                                        | 4-gene signature    | 1.64 (1.20-2.24)         | 0.0021                      | 1.82 (1.33-2.49)         | 0.00018                     | 1.86 (1.27-2.72)         | 0.0014                      | 1.72 (1.28-2.32)         | 0.00035                     | 1.67 (1.25-2.24)         | 0.00061                     |
| <b>MCTP Cohort<br/>(validation)</b>    | <b>Univariate</b>   | 1.54 (0.96-2.46)         | 0.075                       | 0.89 (0.44-1.82)         | 0.76                        | 1.02 (0.98-1.06)         | 0.45                        | 2.15 (0.94-4.93)         | 0.070                       | 0.98 (0.79-1.22)         | 0.88                        |
|                                        | <b>Multivariate</b> |                          |                             |                          |                             |                          |                             |                          |                             |                          |                             |
|                                        | other signature     | 1.27 (0.77-2.08)         | 0.35                        | 0.77 (0.37-1.64)         | 0.50                        | 1.04 (1.00-1.08)         | 0.037                       | 1.72 (0.75-3.92)         | 0.20                        | 1.27 (0.97-1.67)         | 0.079                       |
|                                        | 4-gene signature    | 2.29 (1.36-3.84)         | 0.0018                      | 2.55 (1.52-4.28)         | 0.00041                     | 3.35 (1.90-5.91)         | <0.0001                     | 2.26 (1.37-3.71)         | 0.0013                      | 3.62 (1.93-6.81)         | <0.0001                     |

**Supplemental Table 11: KRAS and EGFR mutation TCGA cases**Non-silent KRAS and EGFR mutations extracted from raw MAF files at the Broad GDAC FireHose ([gdac.broadinstitute.org](http://gdac.broadinstitute.org))

| <b>Hugo_Symbol</b> | <b>Variant_Classification</b> | <b>Variant_Type</b> | <b>Tumor_Sample_Barcode</b>  | <b>Protein_Change</b> | <b>Patient Barcode</b> |
|--------------------|-------------------------------|---------------------|------------------------------|-----------------------|------------------------|
| EGFR               | Splice_Site                   | SNP                 | TCGA-05-4382-01A-01D-1931-08 | p.E545_splice         | TCGA-05-4382           |
| EGFR               | In_Frame_Del                  | DEL                 | TCGA-05-4402-01A-01D-1265-08 | p.ATSPKANKE750del     | TCGA-05-4402           |
| EGFR               | Missense_Mutation             | SNP                 | TCGA-05-4410-01A-21D-1855-08 | p.R377S               | TCGA-05-4410           |
| EGFR               | Missense_Mutation             | SNP                 | TCGA-05-5423-01A-01D-1625-08 | p.L833F               | TCGA-05-5423           |
| EGFR               | Missense_Mutation             | SNP                 | TCGA-05-5423-01A-01D-1625-08 | p.L861Q               | TCGA-05-5423           |
| EGFR               | Missense_Mutation             | SNP                 | TCGA-05-5425-01A-02D-1625-08 | p.F856L               | TCGA-05-5425           |
| EGFR               | Missense_Mutation             | SNP                 | TCGA-17-Z002-01A-01W-0746-08 | p.A1013V              | TCGA-17-Z002           |
| EGFR               | Missense_Mutation             | SNP                 | TCGA-17-Z026-01A-01W-0746-08 | p.G721V               | TCGA-17-Z026           |
| EGFR               | In_Frame_Del                  | DEL                 | TCGA-17-Z032-01A-01W-0746-08 | p.KELREA745del        | TCGA-17-Z032           |
| EGFR               | Missense_Mutation             | SNP                 | TCGA-17-Z047-01A-01W-0747-08 | p.L858R               | TCGA-17-Z047           |
| EGFR               | In_Frame_Ins                  | INS                 | TCGA-17-Z048-01A-01W-0746-08 | p.770_771EP>EG*P      | TCGA-17-Z048           |
| EGFR               | Missense_Mutation             | SNP                 | TCGA-38-4627-01A-01D-1553-08 | p.L858R               | TCGA-38-4627           |
| EGFR               | Missense_Mutation             | SNP                 | TCGA-38-4627-01A-01D-1553-08 | p.L62R                | TCGA-38-4627           |
| EGFR               | In_Frame_Del                  | DEL                 | TCGA-38-4628-01A-01D-1265-08 | p.KELREA745del        | TCGA-38-4628           |
| EGFR               | Missense_Mutation             | SNP                 | TCGA-38-4629-01A-02D-1265-08 | p.G465R               | TCGA-38-4629           |
| EGFR               | In_Frame_Del                  | DEL                 | TCGA-38-6178-01A-11D-1753-08 | p.KELREA745del        | TCGA-38-6178           |
| EGFR               | In_Frame_Del                  | DEL                 | TCGA-44-2661-01A-01D-1105-08 | p.KELREA745del        | TCGA-44-2661           |
| EGFR               | In_Frame_Del                  | DEL                 | TCGA-44-2661-01A-01D-1105-08 | p.KELREA745del        | TCGA-44-2661           |
| EGFR               | Missense_Mutation             | SNP                 | TCGA-44-6147-01A-11D-1753-08 | p.S768I               | TCGA-44-6147           |
| EGFR               | Missense_Mutation             | SNP                 | TCGA-44-6147-01A-11D-1753-08 | p.V769L               | TCGA-44-6147           |
| EGFR               | Missense_Mutation             | SNP                 | TCGA-44-6147-01A-11D-1753-08 | p.S768I               | TCGA-44-6147           |
| EGFR               | Missense_Mutation             | SNP                 | TCGA-44-6147-01A-11D-1753-08 | p.V769L               | TCGA-44-6147           |
| EGFR               | Missense_Mutation             | SNP                 | TCGA-44-A4SU-01A-11D-A24P-08 | p.S768I               | TCGA-44-A4SU           |
| EGFR               | Missense_Mutation             | SNP                 | TCGA-44-A4SU-01A-11D-A24P-08 | p.G719C               | TCGA-44-A4SU           |
| EGFR               | Missense_Mutation             | SNP                 | TCGA-49-4490-01A-21D-1855-08 | p.L858R               | TCGA-49-4490           |
| EGFR               | Missense_Mutation             | SNP                 | TCGA-49-4494-01A-01D-1265-08 | p.L858R               | TCGA-49-4494           |
| EGFR               | Missense_Mutation             | SNP                 | TCGA-49-4494-01A-01D-1265-08 | p.T790M               | TCGA-49-4494           |
| EGFR               | In_Frame_Del                  | DEL                 | TCGA-49-4501-01A-01D-1265-08 | p.ELREA746del         | TCGA-49-4501           |
| EGFR               | Splice_Site                   | SNP                 | TCGA-50-5066-01A-01D-1625-08 | p.L210_splice         | TCGA-50-5066           |
| EGFR               | Splice_Site                   | SNP                 | TCGA-50-5066-02A-11D-2107-08 | p.L210_splice         | TCGA-50-5066           |
| EGFR               | Missense_Mutation             | SNP                 | TCGA-50-5944-01A-11D-1753-08 | p.L858R               | TCGA-50-5944           |

|      |                   |     |                              |                |              |
|------|-------------------|-----|------------------------------|----------------|--------------|
| EGFR | Missense_Mutation | SNP | TCGA-50-6591-01A-11D-1753-08 | p.L833V        | TCGA-50-6591 |
| EGFR | In_Frame_Del      | DEL | TCGA-50-6591-01A-11D-1753-08 | p.KANKEI754del | TCGA-50-6591 |
| EGFR | Missense_Mutation | SNP | TCGA-50-6595-01A-12D-1855-08 | p.S768I        | TCGA-50-6595 |
| EGFR | Missense_Mutation | SNP | TCGA-50-6595-01A-12D-1855-08 | p.G719A        | TCGA-50-6595 |
| EGFR | In_Frame_Ins      | INS | TCGA-50-6673-01A-11D-1945-08 | p.772_773insT  | TCGA-50-6673 |
| EGFR | Missense_Mutation | SNP | TCGA-55-6968-01A-11D-1945-08 | p.E866K        | TCGA-55-6968 |
| EGFR | In_Frame_Del      | DEL | TCGA-55-6980-01A-11D-1945-08 | p.ET709del     | TCGA-55-6980 |
| EGFR | In_Frame_Del      | DEL | TCGA-55-6981-01A-11D-1945-08 | p.ELREAT746del | TCGA-55-6981 |
| EGFR | Missense_Mutation | SNP | TCGA-55-7570-01A-11D-2036-08 | p.V300M        | TCGA-55-7570 |
| EGFR | Missense_Mutation | SNP | TCGA-55-7570-01A-11D-2036-08 | p.V300M        | TCGA-55-7570 |
| EGFR | Missense_Mutation | SNP | TCGA-55-7573-01A-11D-2036-08 | p.K754E        | TCGA-55-7573 |
| EGFR | In_Frame_Del      | DEL | TCGA-55-7573-01A-11D-2036-08 | p.ELR746del    | TCGA-55-7573 |
| EGFR | Missense_Mutation | SNP | TCGA-55-8096-01A-11D-2238-08 | p.L858R        | TCGA-55-8096 |
| EGFR | In_Frame_Del      | DEL | TCGA-55-8206-01A-11D-2238-08 | p.ELREA746del  | TCGA-55-8206 |
| EGFR | Missense_Mutation | SNP | TCGA-55-8506-01A-11D-2393-08 | p.L858R        | TCGA-55-8506 |
| EGFR | Missense_Mutation | SNP | TCGA-55-A48Z-01A-12D-A24P-08 | p.G719A        | TCGA-55-A48Z |
| EGFR | Missense_Mutation | SNP | TCGA-62-8394-01A-11D-2323-08 | p.L858R        | TCGA-62-8394 |
| EGFR | In_Frame_Del      | DEL | TCGA-62-8402-01A-11D-2323-08 | p.KELREA745del | TCGA-62-8402 |
| EGFR | In_Frame_Del      | DEL | TCGA-62-A46U-01A-11D-A24D-08 | p.ELREA746del  | TCGA-62-A46U |
| EGFR | Missense_Mutation | SNP | TCGA-64-1681-01A-11D-2063-08 | p.L858R        | TCGA-64-1681 |
| EGFR | Missense_Mutation | SNP | TCGA-67-3770-01A-01W-0928-08 | p.L858R        | TCGA-67-3770 |
| EGFR | Missense_Mutation | SNP | TCGA-67-3770-01A-01D-0969-08 | p.L858R        | TCGA-67-3770 |
| EGFR | Missense_Mutation | SNP | TCGA-67-3770-01A-01W-0928-08 | p.L858R        | TCGA-67-3770 |
| EGFR | Missense_Mutation | SNP | TCGA-67-3770-01A-01D-0969-08 | p.L858R        | TCGA-67-3770 |
| EGFR | Missense_Mutation | SNP | TCGA-67-3772-01A-01W-0928-08 | p.L858R        | TCGA-67-3772 |
| EGFR | Missense_Mutation | SNP | TCGA-67-6217-01A-11D-1753-08 | p.L858R        | TCGA-67-6217 |
| EGFR | In_Frame_Del      | DEL | TCGA-69-7760-01A-11D-2167-08 | p.ET709del     | TCGA-69-7760 |
| EGFR | Nonsense_Mutation | SNP | TCGA-69-7765-01A-11D-2167-08 | p.Q486*        | TCGA-69-7765 |
| EGFR | Missense_Mutation | SNP | TCGA-71-8520-01A-11D-2393-08 | p.L858R        | TCGA-71-8520 |
| EGFR | Missense_Mutation | SNP | TCGA-71-8520-01A-11D-2393-08 | p.L62R         | TCGA-71-8520 |
| EGFR | In_Frame_Del      | DEL | TCGA-75-6207-01A-11D-1753-08 | p.KELREA745del | TCGA-75-6207 |
| EGFR | In_Frame_Del      | DEL | TCGA-75-6212-01A-11D-1753-08 | p.ELR746del    | TCGA-75-6212 |
| EGFR | In_Frame_Del      | DEL | TCGA-75-7025-01A-12D-1945-08 | p.KELREA745del | TCGA-75-7025 |
| EGFR | Missense_Mutation | SNP | TCGA-78-7147-01A-11D-2036-08 | p.L861Q        | TCGA-78-7147 |
| EGFR | Missense_Mutation | SNP | TCGA-78-7147-01A-11D-2036-08 | p.L387M        | TCGA-78-7147 |
| EGFR | Frame_Shift_Del   | DEL | TCGA-78-7147-01A-11D-2036-08 | p.D1084fs      | TCGA-78-7147 |

|      |                   |     |                              |                |              |
|------|-------------------|-----|------------------------------|----------------|--------------|
| EGFR | Missense_Mutation | SNP | TCGA-78-7155-01A-11D-2036-08 | p.Q432H        | TCGA-78-7155 |
| EGFR | Splice_Site       | SNP | TCGA-78-7155-01A-11D-2036-08 | p.G901_splice  | TCGA-78-7155 |
| EGFR | Missense_Mutation | SNP | TCGA-78-7155-01A-11D-2036-08 | p.K754I        | TCGA-78-7155 |
| EGFR | Missense_Mutation | SNP | TCGA-78-7158-01A-11D-2036-08 | p.L907M        | TCGA-78-7158 |
| EGFR | Missense_Mutation | SNP | TCGA-86-8055-01A-11D-2238-08 | p.L858R        | TCGA-86-8055 |
| EGFR | In_Frame_Del      | DEL | TCGA-86-8074-01A-11D-2238-08 | p.KELREA745del | TCGA-86-8074 |
| EGFR | Missense_Mutation | SNP | TCGA-86-8075-01A-11D-2238-08 | p.L858R        | TCGA-86-8075 |
| EGFR | In_Frame_Del      | DEL | TCGA-86-8280-01A-11D-2284-08 | p.KELREA745del | TCGA-86-8280 |
| EGFR | Missense_Mutation | SNP | TCGA-86-8668-01A-11D-2393-08 | p.L858R        | TCGA-86-8668 |
| EGFR | Frame_Shift_Del   | DEL | TCGA-86-A4JF-01A-11D-A24P-08 | p.SE677fs      | TCGA-86-A4JF |
| EGFR | In_Frame_Del      | DEL | TCGA-86-A4P7-01A-11D-A24P-08 | p.ET709del     | TCGA-86-A4P7 |
| EGFR | Missense_Mutation | SNP | TCGA-91-6835-01A-11D-1855-08 | p.L858R        | TCGA-91-6835 |
| EGFR | Missense_Mutation | SNP | TCGA-93-A4JP-01A-11D-A24P-08 | p.L861Q        | TCGA-93-A4JP |
| EGFR | Missense_Mutation | SNP | TCGA-95-7039-01A-11D-1945-08 | p.S921R        | TCGA-95-7039 |
| EGFR | Missense_Mutation | SNP | TCGA-95-7947-01A-11D-2184-08 | p.I91V         | TCGA-95-7947 |
| EGFR | Missense_Mutation | SNP | TCGA-95-7947-01A-11D-2184-08 | p.R1052I       | TCGA-95-7947 |
| EGFR | In_Frame_Del      | DEL | TCGA-97-8171-01A-11D-2284-08 | p.KELREA745del | TCGA-97-8171 |
| EGFR | Splice_Site       | SNP | TCGA-97-8172-01A-11D-2284-08 | p.G627_splice  | TCGA-97-8172 |
| EGFR | Missense_Mutation | SNP | TCGA-97-8177-01A-11D-2284-08 | p.L858R        | TCGA-97-8177 |
| EGFR | In_Frame_Del      | DEL | TCGA-97-8547-01A-11D-2393-08 | p.KELREA745del | TCGA-97-8547 |
| EGFR | In_Frame_Del      | DEL | TCGA-97-8552-01A-11D-2393-08 | p.ELREA746del  | TCGA-97-8552 |
| EGFR | Missense_Mutation | SNP | TCGA-97-A4M1-01A-11D-A24P-08 | p.L858R        | TCGA-97-A4M1 |
| EGFR | In_Frame_Del      | DEL | TCGA-97-A4M6-01A-11D-A24P-08 | p.KELREA745del | TCGA-97-A4M6 |
| EGFR | Missense_Mutation | SNP | TCGA-97-A4M7-01A-11D-A24P-08 | p.L858R        | TCGA-97-A4M7 |
| EGFR | In_Frame_Del      | DEL | TCGA-J2-8192-01A-11D-2238-08 | p.ELREA746del  | TCGA-J2-8192 |
| EGFR | Missense_Mutation | SNP | TCGA-MP-A4SW-01A-21D-A24P-08 | p.L858R        | TCGA-MP-A4SW |
| EGFR | In_Frame_Del      | DEL | TCGA-MP-A4T6-01A-32D-A25L-08 | p.ELR746del    | TCGA-MP-A4T6 |
| EGFR | Missense_Mutation | SNP | TCGA-MP-A4T9-01A-11D-A24P-08 | p.L858R        | TCGA-MP-A4T9 |
| KRAS | Missense_Mutation | SNP | TCGA-05-4244-01A-01D-1105-08 | p.G12C         | TCGA-05-4244 |
| KRAS | Missense_Mutation | SNP | TCGA-05-4249-01A-01D-1105-08 | p.G12C         | TCGA-05-4249 |
| KRAS | Missense_Mutation | SNP | TCGA-05-4250-01A-01D-1105-08 | p.G12C         | TCGA-05-4250 |
| KRAS | Missense_Mutation | SNP | TCGA-05-4390-01A-02D-1753-08 | p.G12V         | TCGA-05-4390 |
| KRAS | Missense_Mutation | SNP | TCGA-05-4395-01A-01D-1265-08 | p.G12V         | TCGA-05-4395 |
| KRAS | Missense_Mutation | SNP | TCGA-05-4403-01A-01D-1265-08 | p.G12C         | TCGA-05-4403 |
| KRAS | Missense_Mutation | SNP | TCGA-05-4415-01A-22D-1855-08 | p.G12C         | TCGA-05-4415 |
| KRAS | Missense_Mutation | SNP | TCGA-05-4417-01A-22D-1855-08 | p.G12C         | TCGA-05-4417 |

|      |                   |     |                              |        |              |
|------|-------------------|-----|------------------------------|--------|--------------|
| KRAS | Missense_Mutation | SNP | TCGA-05-4418-01A-01D-1265-08 | p.G12C | TCGA-05-4418 |
| KRAS | Missense_Mutation | SNP | TCGA-05-4427-01A-21D-1855-08 | p.G12V | TCGA-05-4427 |
| KRAS | Missense_Mutation | SNP | TCGA-05-4433-01A-22D-1855-08 | p.G12V | TCGA-05-4433 |
| KRAS | Missense_Mutation | SNP | TCGA-17-Z010-01A-01W-0746-08 | p.G12V | TCGA-17-Z010 |
| KRAS | Missense_Mutation | SNP | TCGA-17-Z014-01A-01W-0746-08 | p.Q61L | TCGA-17-Z014 |
| KRAS | Missense_Mutation | SNP | TCGA-17-Z017-01A-01W-0746-08 | p.G13C | TCGA-17-Z017 |
| KRAS | Missense_Mutation | SNP | TCGA-17-Z020-01A-01W-0746-08 | p.G12V | TCGA-17-Z020 |
| KRAS | Missense_Mutation | SNP | TCGA-17-Z022-01A-01W-0746-08 | p.G12C | TCGA-17-Z022 |
| KRAS | Missense_Mutation | SNP | TCGA-17-Z033-01A-01W-0746-08 | p.G12V | TCGA-17-Z033 |
| KRAS | Missense_Mutation | SNP | TCGA-17-Z036-01A-01W-0746-08 | p.G12C | TCGA-17-Z036 |
| KRAS | Missense_Mutation | SNP | TCGA-17-Z037-01A-01W-0746-08 | p.G12A | TCGA-17-Z037 |
| KRAS | Missense_Mutation | SNP | TCGA-17-Z042-01A-01W-0746-08 | p.G12C | TCGA-17-Z042 |
| KRAS | Missense_Mutation | SNP | TCGA-17-Z050-01A-01W-0747-08 | p.G12V | TCGA-17-Z050 |
| KRAS | Missense_Mutation | SNP | TCGA-17-Z060-01A-01W-0747-08 | p.G12D | TCGA-17-Z060 |
| KRAS | Missense_Mutation | SNP | TCGA-35-3615-01A-01W-0928-08 | p.G12C | TCGA-35-3615 |
| KRAS | Missense_Mutation | SNP | TCGA-35-3615-01A-01D-1040-01 | p.G12C | TCGA-35-3615 |
| KRAS | Missense_Mutation | SNP | TCGA-35-3615-01A-01W-0928-08 | p.G12C | TCGA-35-3615 |
| KRAS | Missense_Mutation | SNP | TCGA-35-3615-01A-01D-1040-01 | p.G12C | TCGA-35-3615 |
| KRAS | Missense_Mutation | SNP | TCGA-38-4626-01A-01D-1553-08 | p.G12V | TCGA-38-4626 |
| KRAS | Missense_Mutation | SNP | TCGA-44-2668-01A-01W-0928-08 | p.G12C | TCGA-44-2668 |
| KRAS | Missense_Mutation | SNP | TCGA-44-2668-01A-01D-0969-08 | p.G12C | TCGA-44-2668 |
| KRAS | Missense_Mutation | SNP | TCGA-44-2668-01A-01W-0928-08 | p.G12C | TCGA-44-2668 |
| KRAS | Missense_Mutation | SNP | TCGA-44-2668-01A-01D-0969-08 | p.G12C | TCGA-44-2668 |
| KRAS | Missense_Mutation | SNP | TCGA-44-2668-01A-01W-0928-08 | p.G12C | TCGA-44-2668 |
| KRAS | Missense_Mutation | SNP | TCGA-44-2668-01A-01D-0969-08 | p.G12C | TCGA-44-2668 |
| KRAS | Missense_Mutation | SNP | TCGA-44-6145-01A-11D-1753-08 | p.G12V | TCGA-44-6145 |
| KRAS | Missense_Mutation | SNP | TCGA-44-6145-01A-11D-1753-08 | p.G12V | TCGA-44-6145 |
| KRAS | Missense_Mutation | SNP | TCGA-44-6146-01A-11D-1753-08 | p.G12V | TCGA-44-6146 |
| KRAS | Missense_Mutation | SNP | TCGA-44-6146-01A-11D-1753-08 | p.G12V | TCGA-44-6146 |
| KRAS | Missense_Mutation | SNP | TCGA-44-6776-01A-11D-1855-08 | p.G12D | TCGA-44-6776 |
| KRAS | Missense_Mutation | SNP | TCGA-44-6776-01A-11D-1855-08 | p.G12D | TCGA-44-6776 |
| KRAS | Missense_Mutation | SNP | TCGA-44-6777-01A-11D-1855-08 | p.G12C | TCGA-44-6777 |
| KRAS | Missense_Mutation | SNP | TCGA-44-6777-01A-11D-1855-08 | p.G12C | TCGA-44-6777 |
| KRAS | Missense_Mutation | SNP | TCGA-44-7659-01A-11D-2063-08 | p.G12C | TCGA-44-7659 |
| KRAS | Missense_Mutation | SNP | TCGA-44-7661-01A-11D-2063-08 | p.G12V | TCGA-44-7661 |
| KRAS | Missense_Mutation | SNP | TCGA-44-7661-01A-11D-2063-08 | p.G12V | TCGA-44-7661 |



|      |                   |     |                              |        |              |
|------|-------------------|-----|------------------------------|--------|--------------|
| KRAS | Missense_Mutation | SNP | TCGA-44-7671-01A-11D-2063-08 | p.G12C | TCGA-44-7671 |
| KRAS | Missense_Mutation | SNP | TCGA-44-7671-01A-11D-2063-08 | p.G12C | TCGA-44-7671 |
| KRAS | Missense_Mutation | SNP | TCGA-44-7672-01A-11D-2063-08 | p.G12A | TCGA-44-7672 |
| KRAS | Missense_Mutation | SNP | TCGA-44-7672-01A-11D-2063-08 | p.G12A | TCGA-44-7672 |
| KRAS | Missense_Mutation | SNP | TCGA-44-8117-01A-11D-2238-08 | p.L19F | TCGA-44-8117 |
| KRAS | Missense_Mutation | SNP | TCGA-44-A47A-01A-21D-A24D-08 | p.G12D | TCGA-44-A47A |
| KRAS | Missense_Mutation | SNP | TCGA-44-A47F-01A-11D-A24D-08 | p.G12C | TCGA-44-A47F |
| KRAS | Missense_Mutation | SNP | TCGA-49-4505-01A-01D-1931-08 | p.G12C | TCGA-49-4505 |
| KRAS | Missense_Mutation | SNP | TCGA-49-4510-01A-01D-1265-08 | p.G12D | TCGA-49-4510 |
| KRAS | Missense_Mutation | SNP | TCGA-49-6761-01A-31D-1945-08 | p.G12D | TCGA-49-6761 |
| KRAS | Missense_Mutation | SNP | TCGA-50-5051-01A-21D-1855-08 | p.G12C | TCGA-50-5051 |
| KRAS | Missense_Mutation | SNP | TCGA-50-5932-01A-11D-1753-08 | p.G12C | TCGA-50-5932 |
| KRAS | Missense_Mutation | SNP | TCGA-50-5941-01A-11D-1753-08 | p.G12A | TCGA-50-5941 |
| KRAS | Missense_Mutation | SNP | TCGA-50-8457-01A-11D-2323-08 | p.G12A | TCGA-50-8457 |
| KRAS | Missense_Mutation | SNP | TCGA-50-8459-01A-11D-2323-08 | p.G12C | TCGA-50-8459 |
| KRAS | Missense_Mutation | SNP | TCGA-53-7813-01A-11D-2167-08 | p.G12A | TCGA-53-7813 |
| KRAS | Missense_Mutation | SNP | TCGA-55-1595-01A-01D-0969-08 | p.G12C | TCGA-55-1595 |
| KRAS | Missense_Mutation | SNP | TCGA-55-1595-01A-01D-0969-08 | p.G12C | TCGA-55-1595 |
| KRAS | Missense_Mutation | SNP | TCGA-55-6642-01A-11D-1855-08 | p.G12V | TCGA-55-6642 |
| KRAS | Missense_Mutation | SNP | TCGA-55-6970-01A-11D-1945-08 | p.G12V | TCGA-55-6970 |
| KRAS | Missense_Mutation | SNP | TCGA-55-6975-01A-11D-1945-08 | p.G13C | TCGA-55-6975 |
| KRAS | Missense_Mutation | SNP | TCGA-55-6983-01A-11D-1945-08 | p.G12C | TCGA-55-6983 |
| KRAS | Missense_Mutation | SNP | TCGA-55-6984-01A-11D-1945-08 | p.G12A | TCGA-55-6984 |
| KRAS | Missense_Mutation | SNP | TCGA-55-7281-01A-11D-2036-08 | p.G12C | TCGA-55-7281 |
| KRAS | Missense_Mutation | SNP | TCGA-55-7281-01A-11D-2036-08 | p.G12C | TCGA-55-7281 |
| KRAS | Missense_Mutation | SNP | TCGA-55-7283-01A-11D-2036-08 | p.G12S | TCGA-55-7283 |
| KRAS | Missense_Mutation | SNP | TCGA-55-7283-01A-11D-2036-08 | p.G12S | TCGA-55-7283 |
| KRAS | Missense_Mutation | SNP | TCGA-55-7284-01B-11D-2238-08 | p.G12D | TCGA-55-7284 |
| KRAS | Missense_Mutation | SNP | TCGA-55-7576-01A-11D-2063-08 | p.G12S | TCGA-55-7576 |
| KRAS | Missense_Mutation | SNP | TCGA-55-7576-01A-11D-2063-08 | p.G12S | TCGA-55-7576 |
| KRAS | Missense_Mutation | SNP | TCGA-55-7725-01A-11D-2167-08 | p.G12V | TCGA-55-7725 |
| KRAS | Missense_Mutation | SNP | TCGA-55-7726-01A-11D-2167-08 | p.G12C | TCGA-55-7726 |
| KRAS | Missense_Mutation | SNP | TCGA-55-7728-01A-11D-2184-08 | p.G12V | TCGA-55-7728 |
| KRAS | Missense_Mutation | SNP | TCGA-55-7815-01A-11D-2167-08 | p.G12V | TCGA-55-7815 |
| KRAS | Missense_Mutation | SNP | TCGA-55-7907-01A-11D-2167-08 | p.G12C | TCGA-55-7907 |
| KRAS | Missense_Mutation | SNP | TCGA-55-7910-01A-11D-2167-08 | p.G13C | TCGA-55-7910 |

|      |                   |     |                              |        |              |
|------|-------------------|-----|------------------------------|--------|--------------|
| KRAS | Nonsense_Mutation | SNP | TCGA-55-7911-01A-11D-2167-08 | p.K88* | TCGA-55-7911 |
| KRAS | Missense_Mutation | SNP | TCGA-55-7911-01A-11D-2167-08 | p.G12V | TCGA-55-7911 |
| KRAS | Missense_Mutation | SNP | TCGA-55-7914-01A-11D-2167-08 | p.G12C | TCGA-55-7914 |
| KRAS | Missense_Mutation | SNP | TCGA-55-8090-01A-11D-2238-08 | p.G12V | TCGA-55-8090 |
| KRAS | Missense_Mutation | SNP | TCGA-55-8094-01A-11D-2238-08 | p.G13C | TCGA-55-8094 |
| KRAS | Missense_Mutation | SNP | TCGA-55-8097-01A-11D-2238-08 | p.G12C | TCGA-55-8097 |
| KRAS | Missense_Mutation | SNP | TCGA-55-8203-01A-11D-2238-08 | p.G12C | TCGA-55-8203 |
| KRAS | Missense_Mutation | SNP | TCGA-55-8207-01A-11D-2238-08 | p.G12C | TCGA-55-8207 |
| KRAS | Missense_Mutation | SNP | TCGA-55-8299-01A-11D-2284-08 | p.G12C | TCGA-55-8299 |
| KRAS | Missense_Mutation | SNP | TCGA-55-8299-01A-11D-2284-08 | p.G12C | TCGA-55-8299 |
| KRAS | Missense_Mutation | SNP | TCGA-55-8302-01A-11D-2323-08 | p.G12C | TCGA-55-8302 |
| KRAS | Missense_Mutation | SNP | TCGA-55-8508-01A-11D-2393-08 | p.G12C | TCGA-55-8508 |
| KRAS | Missense_Mutation | SNP | TCGA-55-8512-01A-11D-2393-08 | p.G12V | TCGA-55-8512 |
| KRAS | Missense_Mutation | SNP | TCGA-55-8514-01A-11D-2393-08 | p.G12A | TCGA-55-8514 |
| KRAS | Missense_Mutation | SNP | TCGA-55-8615-01A-11D-2393-08 | p.G12C | TCGA-55-8615 |
| KRAS | Missense_Mutation | SNP | TCGA-55-8616-01A-11D-2393-08 | p.G12C | TCGA-55-8616 |
| KRAS | Missense_Mutation | SNP | TCGA-55-A490-01A-11D-A24D-08 | p.G12C | TCGA-55-A490 |
| KRAS | Missense_Mutation | SNP | TCGA-55-A494-01A-11D-A24P-08 | p.G12D | TCGA-55-A494 |
| KRAS | Missense_Mutation | SNP | TCGA-62-8398-01A-11D-2323-08 | p.G12D | TCGA-62-8398 |
| KRAS | Missense_Mutation | SNP | TCGA-62-A46R-01A-11D-A24D-08 | p.G12A | TCGA-62-A46R |
| KRAS | Missense_Mutation | SNP | TCGA-62-A46S-01A-11D-A24D-08 | p.G13D | TCGA-62-A46S |
| KRAS | Missense_Mutation | SNP | TCGA-64-5774-01A-01D-1625-08 | p.G12C | TCGA-64-5774 |
| KRAS | Missense_Mutation | SNP | TCGA-64-5775-01A-01D-1625-08 | p.Q61L | TCGA-64-5775 |
| KRAS | Missense_Mutation | SNP | TCGA-64-5778-01A-01D-1625-08 | p.G12C | TCGA-64-5778 |
| KRAS | Missense_Mutation | SNP | TCGA-64-5815-01A-01D-1625-08 | p.Q61L | TCGA-64-5815 |
| KRAS | Missense_Mutation | SNP | TCGA-67-3773-01A-01D-1040-01 | p.G12V | TCGA-67-3773 |
| KRAS | Missense_Mutation | SNP | TCGA-67-3773-01A-01D-1040-01 | p.G12V | TCGA-67-3773 |
| KRAS | Missense_Mutation | SNP | TCGA-67-3774-01A-01W-0928-08 | p.G12C | TCGA-67-3774 |
| KRAS | Missense_Mutation | SNP | TCGA-67-3774-01A-01W-0928-08 | p.G12V | TCGA-67-3774 |
| KRAS | Missense_Mutation | SNP | TCGA-67-3774-01A-01D-1040-01 | p.G12C | TCGA-67-3774 |
| KRAS | Missense_Mutation | SNP | TCGA-67-3774-01A-01D-1040-01 | p.G12V | TCGA-67-3774 |
| KRAS | Missense_Mutation | SNP | TCGA-67-3774-01A-01W-0928-08 | p.G12C | TCGA-67-3774 |
| KRAS | Missense_Mutation | SNP | TCGA-67-3774-01A-01W-0928-08 | p.G12V | TCGA-67-3774 |
| KRAS | Missense_Mutation | SNP | TCGA-67-3774-01A-01D-1040-01 | p.G12C | TCGA-67-3774 |
| KRAS | Missense_Mutation | SNP | TCGA-67-3774-01A-01D-1040-01 | p.G12V | TCGA-67-3774 |
| KRAS | Missense_Mutation | SNP | TCGA-67-4679-01B-01D-1753-08 | p.G12A | TCGA-67-4679 |

|      |                   |     |                              |         |              |
|------|-------------------|-----|------------------------------|---------|--------------|
| KRAS | Missense_Mutation | SNP | TCGA-69-7973-01A-11D-2184-08 | p.G12C  | TCGA-69-7973 |
| KRAS | Missense_Mutation | SNP | TCGA-69-7974-01A-11D-2184-08 | p.Q61H  | TCGA-69-7974 |
| KRAS | Missense_Mutation | SNP | TCGA-69-7978-01A-11D-2184-08 | p.G12C  | TCGA-69-7978 |
| KRAS | Missense_Mutation | SNP | TCGA-69-7980-01A-11D-2184-08 | p.G12A  | TCGA-69-7980 |
| KRAS | Missense_Mutation | SNP | TCGA-69-8253-01A-11D-2284-08 | p.G12D  | TCGA-69-8253 |
| KRAS | Missense_Mutation | SNP | TCGA-69-8254-01A-11D-2284-08 | p.G12D  | TCGA-69-8254 |
| KRAS | Missense_Mutation | SNP | TCGA-73-4659-01A-01D-1265-08 | p.G12V  | TCGA-73-4659 |
| KRAS | Missense_Mutation | SNP | TCGA-73-4662-01A-01D-1265-08 | p.G12C  | TCGA-73-4662 |
| KRAS | Missense_Mutation | SNP | TCGA-73-4670-01A-01D-1265-08 | p.A146P | TCGA-73-4670 |
| KRAS | Missense_Mutation | SNP | TCGA-73-4677-01A-01D-1265-08 | p.G12A  | TCGA-73-4677 |
| KRAS | Missense_Mutation | SNP | TCGA-73-7498-01A-12D-2184-08 | p.G12C  | TCGA-73-7498 |
| KRAS | Missense_Mutation | SNP | TCGA-75-5126-01A-01D-1753-08 | p.G12C  | TCGA-75-5126 |
| KRAS | Missense_Mutation | SNP | TCGA-75-6206-01A-11D-1753-08 | p.G13D  | TCGA-75-6206 |
| KRAS | Missense_Mutation | SNP | TCGA-75-7027-01A-11D-1945-08 | p.G12V  | TCGA-75-7027 |
| KRAS | Missense_Mutation | SNP | TCGA-75-7030-01A-11D-1945-08 | p.G12D  | TCGA-75-7030 |
| KRAS | Missense_Mutation | SNP | TCGA-78-7145-01A-11D-2036-08 | p.G12D  | TCGA-78-7145 |
| KRAS | Missense_Mutation | SNP | TCGA-78-7145-01A-11D-2036-08 | p.G12C  | TCGA-78-7145 |
| KRAS | Missense_Mutation | SNP | TCGA-78-7148-01A-11D-2036-08 | p.G12C  | TCGA-78-7148 |
| KRAS | Missense_Mutation | SNP | TCGA-78-7160-01A-11D-2036-08 | p.G12D  | TCGA-78-7160 |
| KRAS | Missense_Mutation | SNP | TCGA-78-7161-01A-11D-2036-08 | p.G12V  | TCGA-78-7161 |
| KRAS | Missense_Mutation | SNP | TCGA-78-7166-01A-12D-2063-08 | p.G12C  | TCGA-78-7166 |
| KRAS | Missense_Mutation | SNP | TCGA-78-7167-01A-11D-2063-08 | p.G12C  | TCGA-78-7167 |
| KRAS | Missense_Mutation | SNP | TCGA-78-7167-01A-11D-2063-08 | p.G12V  | TCGA-78-7167 |
| KRAS | Missense_Mutation | SNP | TCGA-78-7539-01A-11D-2063-08 | p.G12C  | TCGA-78-7539 |
| KRAS | Missense_Mutation | SNP | TCGA-78-7540-01A-11D-2063-08 | p.G12V  | TCGA-78-7540 |
| KRAS | Missense_Mutation | SNP | TCGA-78-8655-01A-11D-2393-08 | p.G12S  | TCGA-78-8655 |
| KRAS | Missense_Mutation | SNP | TCGA-80-5608-01A-31D-1945-08 | p.G12A  | TCGA-80-5608 |
| KRAS | Missense_Mutation | SNP | TCGA-83-5908-01A-21D-2284-08 | p.G12A  | TCGA-83-5908 |
| KRAS | Missense_Mutation | SNP | TCGA-86-7713-01A-11D-2063-08 | p.G12C  | TCGA-86-7713 |
| KRAS | Missense_Mutation | SNP | TCGA-86-7713-01A-11D-2063-08 | p.G12C  | TCGA-86-7713 |
| KRAS | Missense_Mutation | SNP | TCGA-86-7953-01A-11D-2184-08 | p.G12D  | TCGA-86-7953 |
| KRAS | Missense_Mutation | SNP | TCGA-86-8054-01A-11D-2238-08 | p.G12V  | TCGA-86-8054 |
| KRAS | Missense_Mutation | SNP | TCGA-86-8056-01A-11D-2238-08 | p.G12D  | TCGA-86-8056 |
| KRAS | Missense_Mutation | SNP | TCGA-86-8076-01A-31D-2238-08 | p.G12D  | TCGA-86-8076 |
| KRAS | Missense_Mutation | SNP | TCGA-86-8359-01A-11D-2323-08 | p.G12A  | TCGA-86-8359 |
| KRAS | Missense_Mutation | SNP | TCGA-86-8674-01A-21D-2393-08 | p.G13C  | TCGA-86-8674 |

|      |                   |     |                              |        |              |
|------|-------------------|-----|------------------------------|--------|--------------|
| KRAS | Missense_Mutation | SNP | TCGA-86-A456-01A-11D-A24D-08 | p.G12V | TCGA-86-A456 |
| KRAS | Missense_Mutation | SNP | TCGA-86-A4JF-01A-11D-A24P-08 | p.G12V | TCGA-86-A4JF |
| KRAS | Missense_Mutation | SNP | TCGA-91-6828-01A-11D-1855-08 | p.G12V | TCGA-91-6828 |
| KRAS | Missense_Mutation | SNP | TCGA-91-6828-01A-11D-1855-08 | p.G12V | TCGA-91-6828 |
| KRAS | Missense_Mutation | SNP | TCGA-91-6836-01A-21D-1855-08 | p.G12A | TCGA-91-6836 |
| KRAS | Missense_Mutation | SNP | TCGA-91-8497-01A-11D-2393-08 | p.G12C | TCGA-91-8497 |
| KRAS | Missense_Mutation | SNP | TCGA-93-7347-01A-11D-2184-08 | p.G12C | TCGA-93-7347 |
| KRAS | Missense_Mutation | SNP | TCGA-93-8067-01A-11D-2284-08 | p.G12V | TCGA-93-8067 |
| KRAS | Missense_Mutation | SNP | TCGA-93-A4JO-01A-21D-A24P-08 | p.G12D | TCGA-93-A4JO |
| KRAS | Missense_Mutation | SNP | TCGA-95-7039-01A-11D-1945-08 | p.D33E | TCGA-95-7039 |
| KRAS | Missense_Mutation | SNP | TCGA-95-7562-01A-11D-2238-08 | p.G12C | TCGA-95-7562 |
| KRAS | Missense_Mutation | SNP | TCGA-95-7567-01A-11D-2063-08 | p.G12V | TCGA-95-7567 |
| KRAS | Missense_Mutation | SNP | TCGA-95-A4VK-01A-11D-A25L-08 | p.G12V | TCGA-95-A4VK |
| KRAS | Missense_Mutation | SNP | TCGA-95-A4VN-01A-11D-A25L-08 | p.G12V | TCGA-95-A4VN |
| KRAS | Missense_Mutation | SNP | TCGA-95-A4VP-01A-21D-A25L-08 | p.G12V | TCGA-95-A4VP |
| KRAS | Missense_Mutation | SNP | TCGA-97-7554-01A-11D-2036-08 | p.G12V | TCGA-97-7554 |
| KRAS | Missense_Mutation | SNP | TCGA-97-7938-01A-11D-2167-08 | p.G12C | TCGA-97-7938 |
| KRAS | Missense_Mutation | SNP | TCGA-97-7941-01A-11D-2184-08 | p.G12A | TCGA-97-7941 |
| KRAS | Missense_Mutation | SNP | TCGA-97-8176-01A-11D-2393-08 | p.G12S | TCGA-97-8176 |
| KRAS | Missense_Mutation | SNP | TCGA-97-8179-01A-11D-2284-08 | p.L19F | TCGA-97-8179 |
| KRAS | Missense_Mutation | SNP | TCGA-97-A4M0-01A-11D-A24P-08 | p.G12C | TCGA-97-A4M0 |
| KRAS | Missense_Mutation | SNP | TCGA-97-A4M5-01A-11D-A24P-08 | p.G12C | TCGA-97-A4M5 |
| KRAS | Missense_Mutation | SNP | TCGA-99-7458-01A-11D-2036-08 | p.G12R | TCGA-99-7458 |
| KRAS | Missense_Mutation | SNP | TCGA-99-8025-01A-11D-2238-08 | p.G13C | TCGA-99-8025 |
| KRAS | Missense_Mutation | SNP | TCGA-99-8028-01A-11D-2238-08 | p.G12C | TCGA-99-8028 |
| KRAS | Missense_Mutation | SNP | TCGA-99-8032-01A-11D-2238-08 | p.G12C | TCGA-99-8032 |
| KRAS | Missense_Mutation | SNP | TCGA-99-8033-01A-11D-2238-08 | p.G13C | TCGA-99-8033 |
| KRAS | Missense_Mutation | SNP | TCGA-J2-8194-01A-11D-2238-08 | p.G12C | TCGA-J2-8194 |
| KRAS | Missense_Mutation | SNP | TCGA-J2-A4AG-01A-11D-A24D-08 | p.G12D | TCGA-J2-A4AG |
| KRAS | Missense_Mutation | SNP | TCGA-L9-A443-01A-12D-A24D-08 | p.G12V | TCGA-L9-A443 |
| KRAS | Missense_Mutation | SNP | TCGA-MN-A4N5-01A-11D-A24P-08 | p.G12C | TCGA-MN-A4N5 |
| KRAS | Missense_Mutation | SNP | TCGA-MP-A4SY-01A-21D-A24P-08 | p.G12D | TCGA-MP-A4SY |
| KRAS | Missense_Mutation | SNP | TCGA-MP-A4T4-01A-11D-A25L-08 | p.G12V | TCGA-MP-A4T4 |
| KRAS | Missense_Mutation | SNP | TCGA-MP-A4T7-01A-11D-A24P-08 | p.G12V | TCGA-MP-A4T7 |
| KRAS | Missense_Mutation | SNP | TCGA-MP-A4T8-01A-11D-A24P-08 | p.G12D | TCGA-MP-A4T8 |
| KRAS | Missense_Mutation | SNP | TCGA-MP-A4TD-01A-32D-A25L-08 | p.G12C | TCGA-MP-A4TD |

|      |                   |     |                              |        |              |
|------|-------------------|-----|------------------------------|--------|--------------|
| KRAS | Missense_Mutation | SNP | TCGA-MP-A4TE-01A-22D-A25L-08 | p.G12C | TCGA-MP-A4TE |
| KRAS | Missense_Mutation | SNP | TCGA-MP-A4TF-01A-11D-A25L-08 | p.G12C | TCGA-MP-A4TF |
| KRAS | Missense_Mutation | SNP | TCGA-MP-A4TI-01A-21D-A24P-08 | p.G12C | TCGA-MP-A4TI |
| KRAS | Missense_Mutation | SNP | TCGA-MP-A4TK-01A-11D-A24P-08 | p.G12V | TCGA-MP-A4TK |
| KRAS | Missense_Mutation | SNP | TCGA-NJ-A4YG-01A-22D-A25L-08 | p.G12D | TCGA-NJ-A4YG |
| KRAS | Missense_Mutation | SNP | TCGA-NJ-A4YI-01A-11D-A25L-08 | p.G12C | TCGA-NJ-A4YI |
| KRAS | Missense_Mutation | SNP | TCGA-NJ-A4YP-01A-11D-A25L-08 | p.L19F | TCGA-NJ-A4YP |
| KRAS | Missense_Mutation | SNP | TCGA-NJ-A4YP-01A-11D-A25L-08 | p.Q61E | TCGA-NJ-A4YP |
| KRAS | Missense_Mutation | SNP | TCGA-NJ-A55O-01A-11D-A25L-08 | p.G12C | TCGA-NJ-A55O |
| KRAS | Missense_Mutation | SNP | TCGA-NJ-A55R-01A-11D-A25L-08 | p.G12A | TCGA-NJ-A55R |

**Supplemental Table 12:** ALK fusion TCGA cases from the TCGA Fusion Gene Databased (MDACC)

For details, please see <http://54.84.12.177/PanCanFusV2/> or ref. 17

| <b>TCGA SampleId</b> | <b>FusionPair</b> | <b>E-value</b> | <b>Tier</b> | <b>Frame</b> | <b>5' Gene Junction</b> | <b>3' Gene Junction</b> |
|----------------------|-------------------|----------------|-------------|--------------|-------------------------|-------------------------|
| TCGA-50-8460-01A     | EML4__ALK         | 0.35           | tier1       | In-frame     | Chr2:42492091/1         | Chr2:29446394/-1        |
| TCGA-67-6215-01A     | EML4__ALK         | 0.35           | tier1       | In-frame     | Chr2:42491871/1         | Chr2:29446394/-1        |
| TCGA-67-6216-01A     | EML4__ALK         | 0.35           | tier1       | In-frame     | Chr2:42492091/1         | Chr2:29446394/-1        |
| TCGA-78-7163-01A     | EML4__ALK         | 0.35           | tier1       | In-frame     | Chr2:42522656/1         | Chr2:29446394/-1        |
| TCGA-86-A4P8-01A     | EML4__ALK         | 0.35           | tier3       | In-frame     | Chr2:42552694/1         | Chr2:29446394/-1        |

**Supplemental Table 13: multivariate Cox proportional hazards model including EGFR, KRAS, and ALK alteration status in full TCGA cohort**

|            | <b>multivariate</b>      |                                  |
|------------|--------------------------|----------------------------------|
|            | Hazard Ratio<br>(95% CI) | Likelihood ratio<br>test p-value |
| Stage      | 1.43 (1.18-1.74)         | 0.00027                          |
| Age        | 1.01 (0.99-1.03)         | 0.19                             |
| Gender     | 0.91 (0.62-1.33)         | 0.61                             |
| Risk Score | 2.13 (1.79-2.52)         | <0.0001                          |
| EGFRmt     | 2.03 (1.26-3.62)         | 0.0049                           |
| KRASmt     | 1.53 (0.99-2.38)         | 0.058                            |
| ALK+       | 0.00 (-Inf-+Inf)*        | 0.96                             |

\* Inf=infinity.
